# Supplementary material
Source: PubMed Central journal article supplement (PMC3711206)
Supplement: supp_126.14.3181_JCS125435.pdf [file supp_126.14.3181_JCS125435.pdf]

# Ficara\_Figure S1

## A Methycellulose colony assay

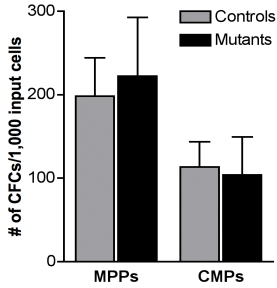

## B Time-course FACS analysis on cultured MPPs

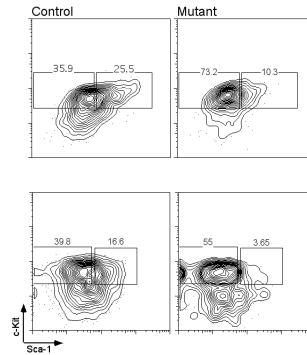

## C In vitro B-cell differentiation from LMPPs

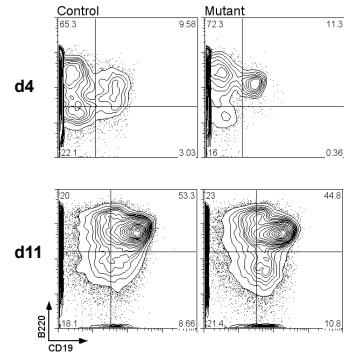

## D GMPs - Time-course FACS analysis upon liquid culture

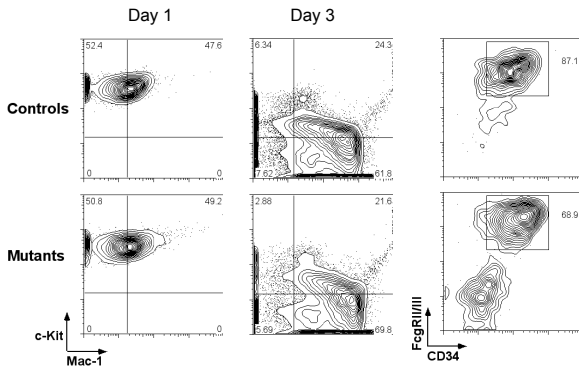

## E CMPs two days after labelling with CFSE

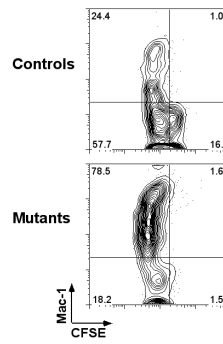

## F In vitro B-cell differentiation from CLPs

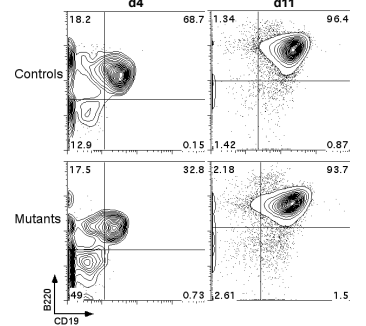

Figure S1. Differentiation of Pbx1-null progenitors. (A) Total number of colonies scored 7-9 days after plating prospectively isolated MPPs or CMPs, respectively, in methylcellulose. (B) Contour plots are referred to the Mac1-Gr1<sup>-</sup> gate shown in Fig. 2B (representative of two). (C) 1,000 prospectively isolated LMPPs (LKSfh) from control or mutant mice were seeded on GFP<sup>+</sup> OP9 stromal cell layers and their progeny analyzed by FACS four or eleven days later for the presence of B cell markers. Representative contour plots are referred to the hematopoietic gate (stromal cells were excluded based on light scatter characteristics and GFP expression). (D) FACS analysis is shown for the progeny of GMPs prospectively isolated from control or mutant mice (representative of two). Dot plots on the right are relative to the cKit+Mac1<sup>-</sup> gate at day 3, showing a higher proportion of Pbx1-null cells lacking the GMP immunophenotype compared to control cells. (E) FACS analysis (representative of two) is shown for the progeny of control or mutant CMPs two days after sorting and labeling with CFSE. (F) Prospectively isolated CLPs from control or mutant mice were seeded on OP9 stromal cells as described in (C).

## Ficara\_Figure S2

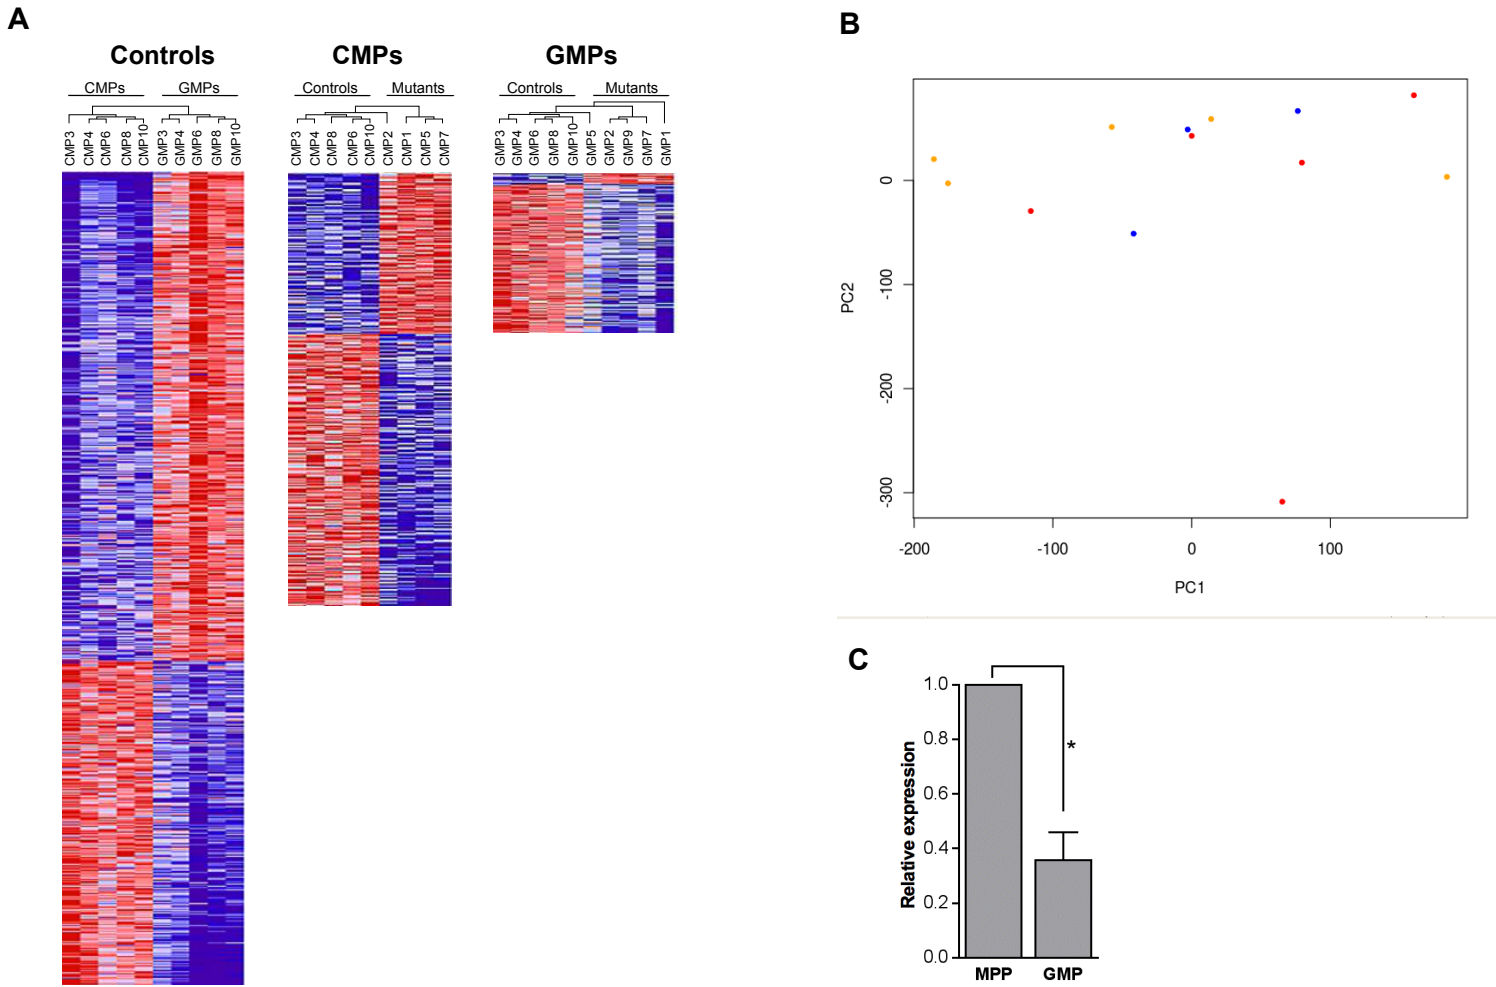

Figure S2. Gene expression profiles of CMPs and GMPs from control or Pbx1-null mice. (A) Heat maps show the expression of the CMP-to-GMP transition in control mice (left), and of Pbx1-regulated genes in CMPs (middle) and in GMPs (right) from control or mutant individual mice. Up-regulated and down-regulated genes are displayed in red and blue, respectively. (B) PCA analysis of control CMPs and GMPs (red and orange, respectively), and of Pbx1-null CMPs (blue). (C) The histogram shows Pbx1 transcript levels relative to MPPs as measured by real-time PCR (four biological replicates, each performed in duplicate; \* $p < 0.01$ ).

### Ficara\_Figure S3

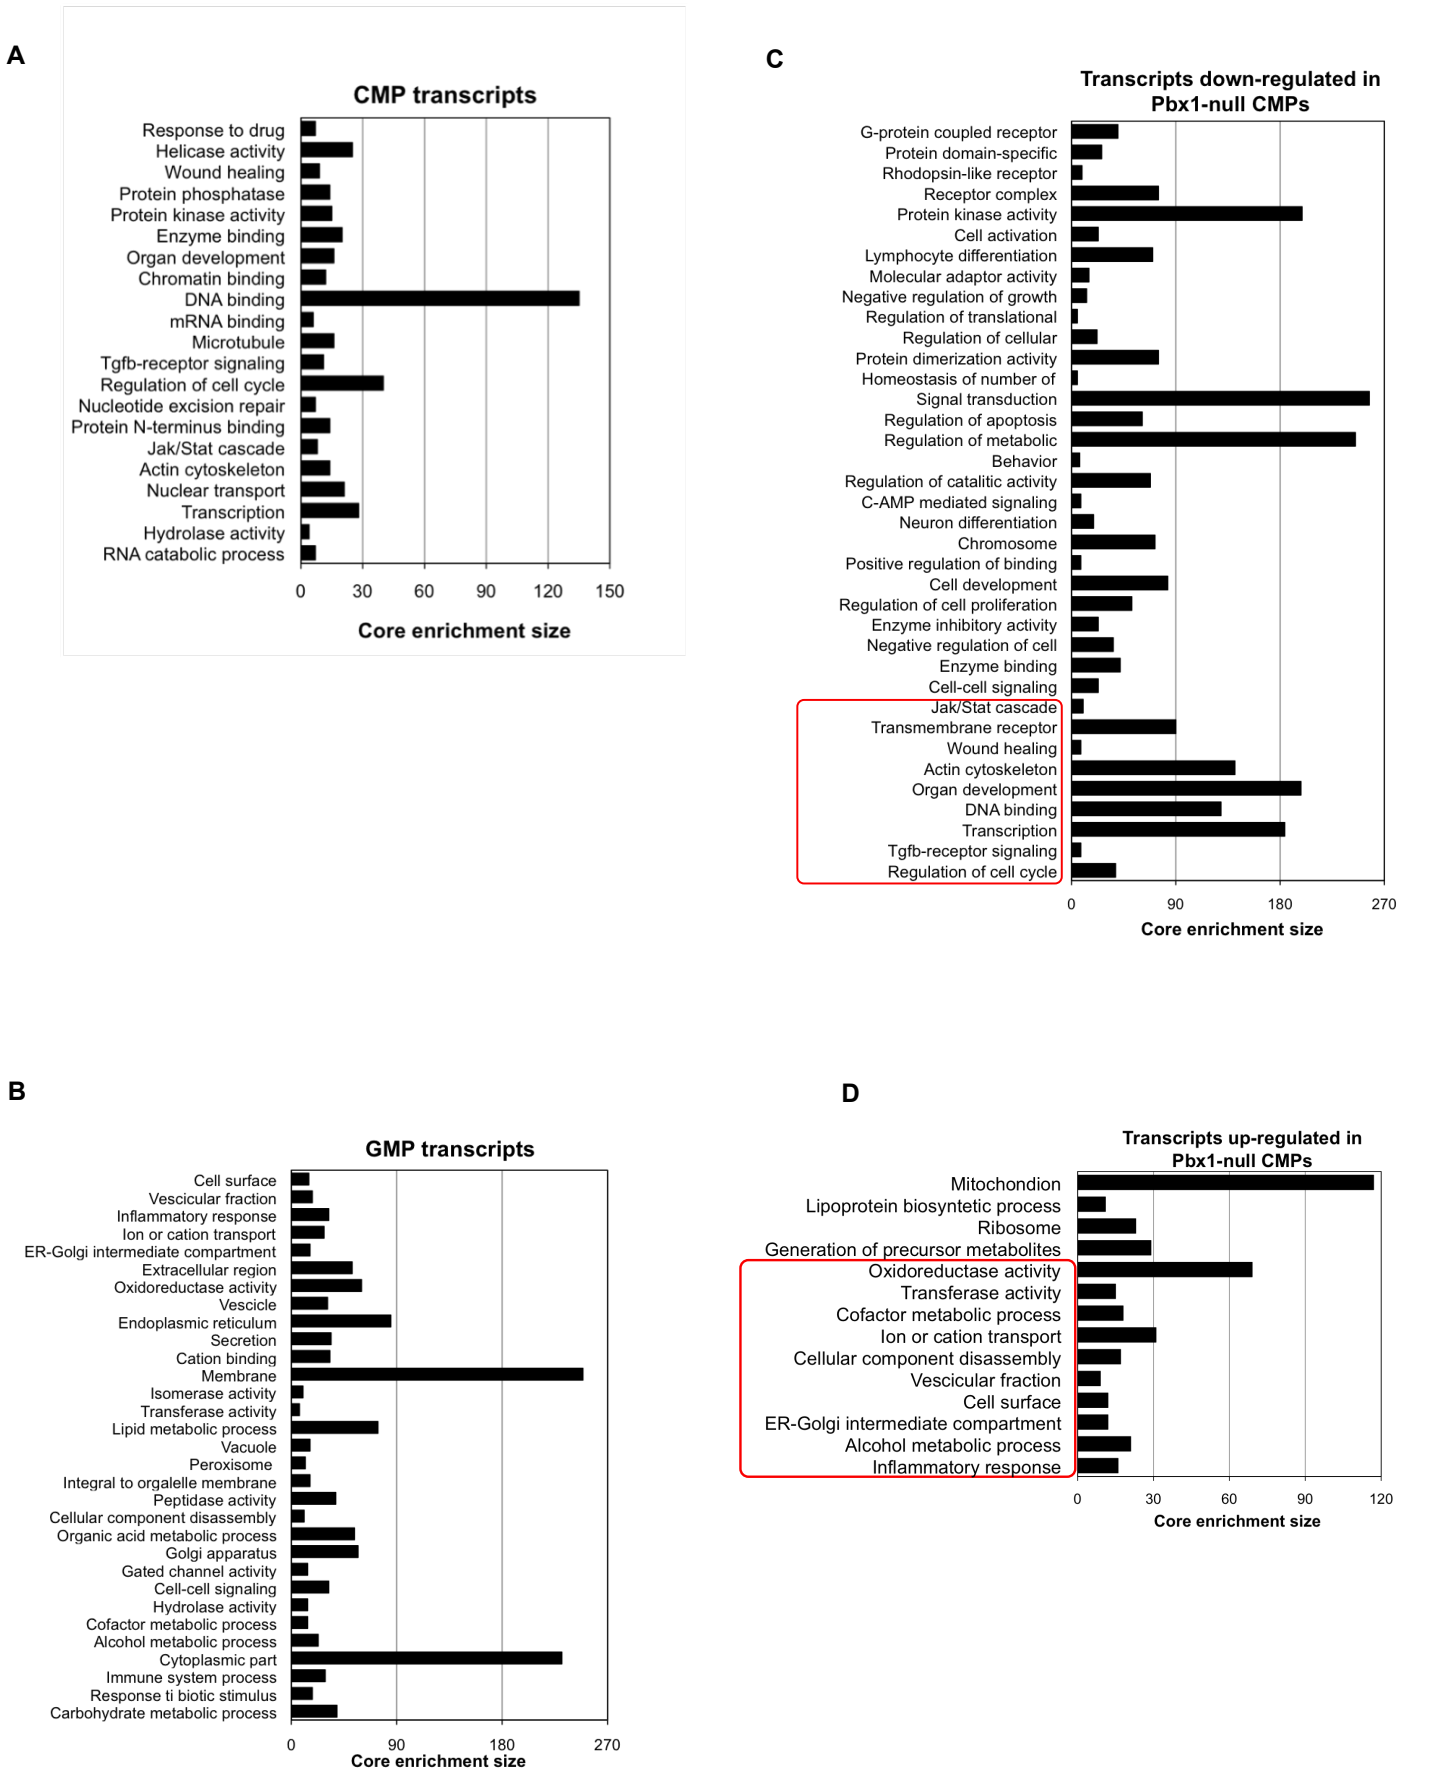

Figure S3. GO analysis. The distribution into GO groups is shown for (A) normal CMP transcripts (= down-regulated in control GMPs compared to control CMPs), (B) normal GMP transcripts (= up-regulated in control GMPs compared to control CMPs), (C) transcripts down-regulated in Pbx1-null CMPs compared to control CMPs, (D) transcripts up-regulated in Pbx1-null CMPs compared to control CMPs, as determined by GSEA. Bars indicate the number of leading edge transcripts (core enrichment size) belonging to each functional group. GO groups with FDR q-value  $\leq 0.23$  and Nominal p-value  $\leq 0.05$  were considered significantly enriched. GO annotations highlighted in red in C, D represent GO groups in common with those in A and B, respectively.

# Ficara\_Figure S4

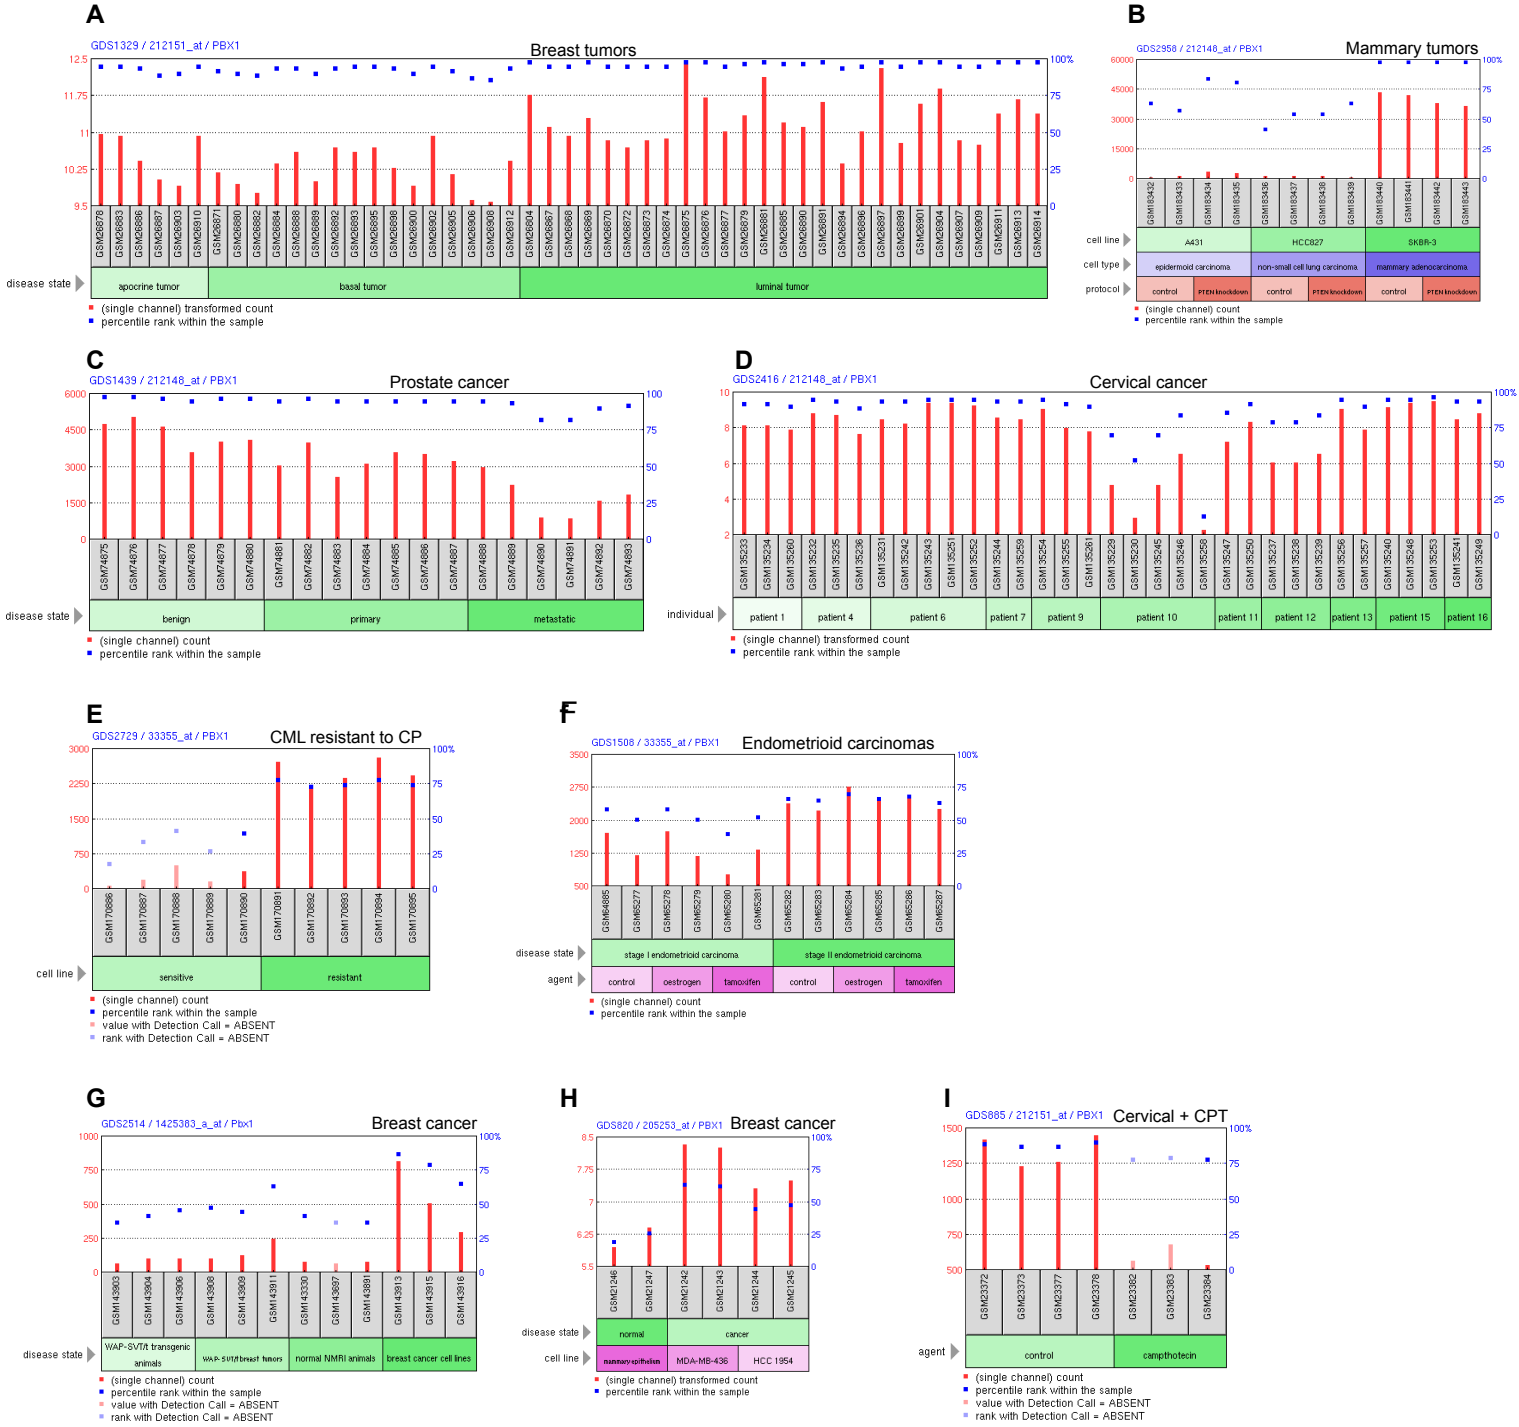

Figure S4. Pbx1 expression in cancer cells within the GEO dataset. The images represent the abundance profile for Pbx1 across each Sample in a DataSet. GEO accession numbers are in the top left corner of each profile. (A) Analysis of tumors of 49 breast cancer patients. Tumors classified into luminal, basal, and molecular apocrine classes. Apocrine tumors are estrogen receptor negative (ER-) and androgen receptor positive (AR+), while luminal tumors are ER+ and AR+, and basal tumors are ER- and AR-. (B) Analysis of carcinoma cell lines depleted for the tumor suppressor PTEN, showing that Pbx1 is expressed in mammary adenocarcinoma. (C) Expression profiling of prostate cancer tumors that are benign, clinically localized, or metastatic and refractory to hormones. (D) Analysis of 33 biopsies from 11 cervical cancer patients. Biopsies were obtained from different areas of each tumor. (E) Analysis of chronic myelogenous leukemia (CML) cells resistant to cyclophosphamide (CP), an alkylating anticancer drug. (F) Analysis of endometrial epithelial cells from stage I or II endometrioid carcinomas after treatment with oestrogen or tamoxifen. (G) Analysis of mammary gland segments from WAP-SVT/t transgenic animals. These animals selectively synthesize the SV40 T/t antigen in mammary gland epithelial cells and develop breast cancer after the first lactation. (H) Expression profiling of breast cancer cell lines in reference to mammary epithelial cells. (I) HeLa tumor cells treated with 10 mM topoisomerase poison camptothecin (CPT) for 8 hours.

Ficara\_Figure S5

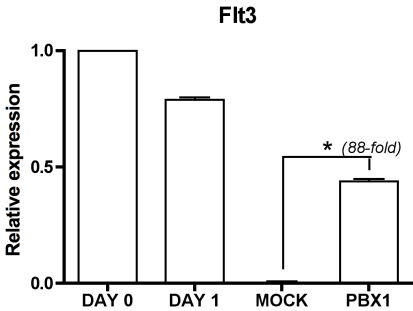

Figure S5. Flt3 expression level from the experiment described in Fig. 6B. \*p=0.0007.

Table S1. CMP to GMP transition gene signature in control mice.

**Genes up-regulated in GMPs compared to CMPs (= GMP gene signature)**

| Probe Set    | Gene Symbol                      | CMPs  |       |       |       |         | GMPs  |       |        |       |         | Av Cont | Av Mut  | Fold Diff | q-value(%)  |
|--------------|----------------------------------|-------|-------|-------|-------|---------|-------|-------|--------|-------|---------|---------|---------|-----------|-------------|
|              |                                  | CMP3  | CMP4  | CMP6  | CMP8  | CMP10   | GMP3  | GMP4  | GMP6   | GMP8  | GMP10   |         |         |           |             |
| 1449846_at   | Ear2                             | 86.67 | 69.24 | 60    | 73.64 | 60      | 1855  | 7024  | 20000  | 10883 | 12871.2 | 69.91   | 10526.6 | 150.57    | 6.981670997 |
| 1422411_s_at | Ear1 /// Ear12 /// Ear2 /// Ear3 | 70.9  | 71.91 | 60    | 60    | 60      | 1856  | 11815 | 16104  | 9478  | 7965.49 | 64.562  | 9443.79 | 146.27    | 4.305363781 |
| 1422873_at   | Prg2                             | 60    | 173.2 | 60    | 60    | 60      | 7242  | 13836 | 8674.2 | 12344 | 8865.6  | 82.646  | 10192.4 | 123.33    | 0           |
| 1449136_at   | Epx                              | 60    | 60    | 60    | 60    | 60      | 1855  | 2766  | 4885.8 | 4949  | 4717.1  | 60      | 3834.63 | 63.91     | 1.132990469 |
| 1449924_at   | Prg3                             | 60    | 144   | 60    | 80.26 | 127.69  | 586.4 | 1573  | 2210.6 | 2620  | 2920.55 | 94.38   | 1982.23 | 21.00     | 2.81898819  |
| 1448620_at   | Fcgr3                            | 140.2 | 485.6 | 484.1 | 289.3 | 388.79  | 2367  | 2602  | 2191   | 2894  | 2491.7  | 357.586 | 2509.24 | 7.02      | 0           |
| 1454713_s_at | Hdc                              | 580.9 | 1044  | 988.6 | 1169  | 800.59  | 5313  | 4807  | 5963.6 | 4744  | 6095.63 | 916.774 | 5384.7  | 5.87      | 0           |
| 1435749_at   | Gda                              | 526.9 | 899.6 | 397.8 | 420   | 153.38  | 1359  | 1291  | 4618.9 | 2734  | 3206.71 | 479.526 | 2641.98 | 5.51      | 6.981670997 |
| 1434510_at   | Papss2                           | 131   | 214.1 | 338.9 | 120.3 | 106.6   | 1164  | 789.2 | 900.17 | 966.5 | 832.34  | 182.188 | 930.338 | 5.11      | 0           |
| 1417389_at   | Gpc1                             | 103.6 | 239.6 | 259.9 | 103.2 | 92.56   | 385.8 | 451.2 | 1301.1 | 772.9 | 897     | 159.776 | 761.592 | 4.77      | 5.986067289 |
| 1438511_a_at | 1190002H23Rik                    | 504.4 | 695.9 | 558.6 | 486.7 | 243.03  | 1200  | 1651  | 3756.9 | 2120  | 2513.29 | 497.72  | 2248.31 | 4.52      | 4.305363781 |
| 1449184_at   | Pglyrp1                          | 60    | 158.9 | 173.5 | 131.6 | 85.44   | 211.6 | 323.4 | 942.82 | 669.6 | 603.8   | 121.888 | 550.232 | 4.51      | 8.934207489 |
| 1420572_at   | Ms4a3                            | 757.6 | 6415  | 4536  | 1656  | 1279.78 | 11740 | 11834 | 16868  | 12903 | 11569   | 2928.85 | 12982.9 | 4.43      | 0           |
| 1428781_at   | Dmkn                             | 60    | 165.2 | 163.3 | 66.4  | 60      | 389.7 | 406.6 | 781.98 | 345.1 | 292.94  | 102.984 | 443.244 | 4.30      | 5.876757684 |
| 1448330_at   | Gstm1                            | 252.2 | 1074  | 753.5 | 404.3 | 378.88  | 1724  | 2344  | 3438.3 | 2512  | 2146.32 | 572.632 | 2432.86 | 4.25      | 1.132990469 |
| 1415897_a_at | Mgst1                            | 320.5 | 627.5 | 847.7 | 568.6 | 426.84  | 1560  | 1809  | 2683.5 | 3102  | 2437.77 | 558.228 | 2318.39 | 4.15      | 1.132990469 |
| 1460271_at   | Trem3                            | 180.9 | 777.4 | 826   | 395.2 | 281.4   | 1136  | 1482  | 3053.2 | 2618  | 1879.36 | 492.174 | 2033.67 | 4.13      | 3.863788009 |
| 1451796_s_at | Hdc                              | 60    | 541.6 | 466   | 341.4 | 269.32  | 2414  | 1806  | 688.78 | 1160  | 831.73  | 335.664 | 1380.16 | 4.11      | 9.872171728 |
| 1418003_at   | 1190002H23Rik                    | 111.4 | 386.8 | 219.3 | 102.7 | 104.86  | 973   | 637.6 | 744.81 | 599   | 597.21  | 185.018 | 710.304 | 3.84      | 1.132990469 |
| 1417679_at   | Gfi1                             | 122   | 430.3 | 546.3 | 333.4 | 301.13  | 809.8 | 849   | 2158.6 | 1364  | 1423.93 | 346.612 | 1321.07 | 3.81      | 5.118264635 |
| 1416416_x_at | Gstm1                            | 856.9 | 3365  | 2246  | 1222  | 1110.41 | 7103  | 6240  | 8179.1 | 6086  | 5879.95 | 1759.88 | 6697.58 | 3.81      | 0           |
| 1418920_at   | Cldn15                           | 141.9 | 245.6 | 319.7 | 118.5 | 114.07  | 539.6 | 426.7 | 969.24 | 838.7 | 581.53  | 187.954 | 671.164 | 3.57      | 2.918890699 |
| 1418937_at   | Dio2                             | 206.3 | 566.8 | 381.7 | 220   | 181     | 1050  | 881.9 | 1543.8 | 947.8 | 1101.59 | 311.14  | 1105.08 | 3.55      | 1.132990469 |
| 1423954_at   | C3                               | 86.91 | 225.5 | 184.2 | 72.24 | 60.54   | 447.2 | 370.4 | 600.95 | 504.1 | 273.21  | 125.876 | 439.152 | 3.49      | 2.226912301 |
| 1416183_a_at | Ldhb                             | 298.1 | 552.5 | 577.7 | 422.6 | 571.81  | 1001  | 998   | 2171.5 | 2022  | 1827.57 | 484.538 | 1604.06 | 3.31      | 3.376755907 |
| 1448881_at   | Hp                               | 1017  | 2504  | 2696  | 1880  | 1072.38 | 7945  | 5182  | 6202.7 | 5895  | 4766.98 | 1833.9  | 5998.56 | 3.27      | 0           |
| 1441930_x_at | Vat1                             | 1385  | 1562  | 593   | 2444  | 822.25  | 1903  | 5045  | 4564   | 4572  | 5936.61 | 1361.21 | 4403.93 | 3.24      | 3.863788009 |
| 1425627_x_at | Gstm1                            | 138.9 | 354.7 | 340   | 373.7 | 353.72  | 456.6 | 789.6 | 1722.3 | 907   | 1105.85 | 312.198 | 996.266 | 3.19      | 8.934207489 |
| 1421571_a_at | LOC100041546 /// LOC10004        | 1473  | 7528  | 10068 | 2567  | 3220.99 | 11280 | 15021 | 20000  | 17183 | 14206.3 | 4971.58 | 15538.2 | 3.13      | 2.226912301 |
| 1429189_at   | Arsb                             | 421.9 | 1114  | 1569  | 791.7 | 1030.18 | 2374  | 2762  | 3866.8 | 3791  | 2565.66 | 985.368 | 3071.75 | 3.12      | 1.132990469 |
| 1448237_x_at | Ldhb                             | 346.3 | 425.7 | 481.3 | 466.6 | 372.15  | 636.8 | 630.6 | 1794.7 | 1491  | 1833.14 | 418.398 | 1277.23 | 3.05      | 8.934207489 |
| 1455235_x_at | Ldhb                             | 475.6 | 461.9 | 585.3 | 479.5 | 447.19  | 811   | 838.8 | 2129.3 | 1569  | 1954    | 489.888 | 1460.37 | 2.98      | 5.986067289 |
| 1421408_at   | Igsf6                            | 123.4 | 513.9 | 622.6 | 318.6 | 248.81  | 1043  | 1059  | 1010.2 | 1241  | 1084.93 | 365.458 | 1087.69 | 2.98      | 0           |
| 1458703_at   | ---                              | 61.65 | 102.4 | 69.67 | 65.63 | 60.97   | 117   | 108.5 | 338.99 | 208.8 | 298.48  | 72.06   | 214.356 | 2.97      | 11.33922971 |
| 1451858_at   | LOC668727 /// Mrgpra2            | 60    | 160.1 | 248   | 112.8 | 214.09  | 496.8 | 293   | 623.99 | 395.4 | 540.34  | 158.99  | 469.914 | 2.96      | 2.460207875 |
| 1439651_at   | ---                              | 102.6 | 104.1 | 111.6 | 153.7 | 129.74  | 285.8 | 232.3 | 314.9  | 319.3 | 603.68  | 120.35  | 351.186 | 2.92      | 6.981670997 |
| 1417542_at   | Rps6ka2                          | 238.4 | 590.1 | 423.9 | 572.2 | 293.62  | 644.4 | 817.5 | 2072.7 | 1100  | 1517.77 | 423.664 | 1230.43 | 2.90      | 9.872171728 |

Table S1. CMP to GMP transition gene signature in control mice.

**Genes up-regulated in GMPs compared to CMPs (= GMP gene signature)**

| Probe Set    | Gene Symbol                  | CMPs  |       |       |       |         | GMPs  |       |        |       |         | Av Cont | Av Mut  | Fold Diff | q-value(%)  |
|--------------|------------------------------|-------|-------|-------|-------|---------|-------|-------|--------|-------|---------|---------|---------|-----------|-------------|
|              |                              | CMP3  | CMP4  | CMP6  | CMP8  | CMP10   | GMP3  | GMP4  | GMP6   | GMP8  | GMP10   |         |         |           |             |
| 1448213_at   | Anxa1                        | 1433  | 3431  | 5578  | 3133  | 3482.01 | 9200  | 10756 | 9683.8 | 11773 | 7897.04 | 3411.43 | 9861.9  | 2.89      | 0           |
| 1429146_at   | 6620401M08Rik                | 512   | 535   | 566   | 726.9 | 549.66  | 880   | 909.3 | 2748.1 | 1807  | 1939.72 | 577.904 | 1656.77 | 2.87      | 9.872171728 |
| 1420641_a_at | Sqrdl                        | 172.4 | 270.7 | 353.2 | 277.8 | 205.12  | 586.3 | 429.5 | 1087   | 691.5 | 836.68  | 255.834 | 726.198 | 2.84      | 4.305363781 |
| 1420621_a_at | App                          | 60    | 123.1 | 212.8 | 67.03 | 94.52   | 273.7 | 208   | 500.74 | 305   | 287.57  | 111.494 | 314.99  | 2.83      | 5.986067289 |
| 1423726_at   | Vat1                         | 168.4 | 209.7 | 155.7 | 171.3 | 89.8    | 374.4 | 536.5 | 420.75 | 366.7 | 510.52  | 158.954 | 441.776 | 2.78      | 0           |
| 1457666_s_at | lfi202b                      | 238.7 | 558.3 | 442.5 | 315.2 | 288.99  | 486   | 897.4 | 1470.4 | 878.5 | 1308.53 | 368.722 | 1008.17 | 2.73      | 6.981670997 |
| 1424524_at   | 1200002N14Rik                | 164.5 | 473.2 | 434.9 | 350.9 | 235.23  | 578.4 | 611.9 | 1568.4 | 856.6 | 864.95  | 331.722 | 896.05  | 2.70      | 11.33922971 |
| 1435040_at   | Irak3                        | 152.8 | 479.2 | 426.8 | 363.6 | 275.21  | 780.9 | 864.1 | 987.25 | 905.1 | 1026.42 | 339.518 | 912.75  | 2.69      | 0           |
| 1444524_at   | LOC100043424 /// OTTMUSG     | 115.7 | 306.3 | 227.9 | 260.9 | 156.18  | 352.7 | 464   | 694.96 | 566   | 790.14  | 213.418 | 573.572 | 2.69      | 3.376755907 |
| 1442025_a_at | ---                          | 211.1 | 215.8 | 138.1 | 254.8 | 205.02  | 427.8 | 410.2 | 592.28 | 418.7 | 871.25  | 204.968 | 544.044 | 2.65      | 5.876757684 |
| 1425626_at   | Gstm1                        | 62.03 | 90.69 | 105.8 | 60    | 141.47  | 149.3 | 149.7 | 381.33 | 233.7 | 293.59  | 91.988  | 241.498 | 2.63      | 8.934207489 |
| 1436584_at   | Spry2                        | 73.4  | 88.84 | 132.9 | 60    | 69.37   | 246.4 | 150.4 | 291.53 | 211.3 | 207.67  | 84.906  | 221.464 | 2.61      | 1.832069694 |
| 1453072_at   | Gpr160                       | 175.1 | 578   | 766.5 | 333.3 | 594.6   | 1206  | 992.6 | 1764.9 | 1246  | 1075.8  | 489.522 | 1256.89 | 2.57      | 2.81898819  |
| 1420407_at   | Ltb4r1                       | 432.8 | 394.1 | 301.8 | 355.8 | 256.5   | 923.1 | 650.5 | 1069.5 | 898   | 894.51  | 348.2   | 887.108 | 2.55      | 0           |
| 1439859_at   | 9630033F20Rik /// LOC67742   | 83.97 | 107.3 | 133.8 | 153.2 | 93.43   | 181.9 | 155.7 | 428.78 | 267.7 | 342.32  | 114.33  | 275.284 | 2.41      | 9.872171728 |
| 1421551_s_at | lfi202b                      | 89.53 | 339.1 | 341.9 | 79    | 162.16  | 357.7 | 612.4 | 593.07 | 388.9 | 427.8   | 202.33  | 475.968 | 2.35      | 6.981670997 |
| 1417124_at   | Dstn                         | 632.6 | 1947  | 2121  | 575.6 | 1041.91 | 3119  | 2606  | 3383.1 | 3708  | 1812.71 | 1263.61 | 2925.86 | 2.32      | 5.986067289 |
| 1460283_at   | Mefv                         | 108.4 | 149.8 | 184.7 | 133.3 | 84.47   | 273.6 | 226.2 | 461.75 | 292   | 274.58  | 132.146 | 305.602 | 2.31      | 4.305363781 |
| 1450753_at   | Nkg7                         | 2518  | 4290  | 3138  | 1517  | 1934.27 | 7000  | 7289  | 6855.5 | 5374  | 4392.76 | 2679.27 | 6182.14 | 2.31      | 2.226912301 |
| 1419537_at   | Tcfec                        | 142.8 | 349.5 | 449.3 | 248   | 160.69  | 665   | 626   | 672.21 | 698.5 | 431.87  | 270.05  | 618.702 | 2.29      | 2.460207875 |
| 1417741_at   | Pygl                         | 470.3 | 1007  | 1123  | 730.3 | 1012.85 | 1549  | 1688  | 2435.1 | 2466  | 1809.23 | 868.762 | 1989.46 | 2.29      | 2.226912301 |
| 1449392_at   | Hsd17b1                      | 66.98 | 140.4 | 141.1 | 172.7 | 147.95  | 247.1 | 219.7 | 378.44 | 271.6 | 406.66  | 133.812 | 304.676 | 2.28      | 3.863788009 |
| 1435477_s_at | Fcgr2b                       | 214.1 | 772.6 | 1075  | 686.8 | 732.88  | 1560  | 1798  | 1549   | 1590  | 1417.06 | 696.222 | 1582.83 | 2.27      | 1.132990469 |
| 1454311_at   | ---                          | 61.65 | 118.2 | 111.4 | 122.5 | 107.7   | 160.7 | 159.9 | 258.94 | 242.2 | 352.88  | 104.276 | 234.91  | 2.25      | 6.981670997 |
| 1422433_s_at | ldh1                         | 2523  | 2658  | 3752  | 2898  | 2276.41 | 5581  | 5395  | 7122.6 | 7175  | 6368.19 | 2821.63 | 6328.35 | 2.24      | 0           |
| 1453049_at   | 6620401M08Rik                | 624.9 | 367.7 | 237.6 | 551.9 | 190.3   | 639.8 | 573   | 1143.3 | 862.1 | 1197.98 | 394.46  | 883.228 | 2.24      | 8.934207489 |
| 1418888_a_at | Sepx1                        | 764   | 1433  | 1024  | 1222  | 835.76  | 2334  | 2410  | 2516.3 | 2266  | 2220.96 | 1055.69 | 2349.36 | 2.23      | 0           |
| 1450387_s_at | Ak3l1 /// LOC100047616 /// L | 206.3 | 483   | 367.2 | 277.6 | 180.5   | 582   | 768   | 779.82 | 560.2 | 676.04  | 302.92  | 673.2   | 2.22      | 1.832069694 |
| 1417702_a_at | Hnmt                         | 60    | 107.5 | 82.29 | 60    | 60      | 194.7 | 200.1 | 190.45 | 158.6 | 77.51   | 73.952  | 164.276 | 2.22      | 5.986067289 |
| 1427747_a_at | Lcn2                         | 60    | 60    | 64.61 | 60    | 60      | 126.7 | 97.21 | 153.83 | 198.3 | 97.98   | 60.922  | 134.814 | 2.21      | 5.118264635 |
| 1449773_s_at | Gadd45b                      | 304.5 | 180.2 | 182.2 | 190.9 | 141.15  | 387.9 | 259.8 | 620.14 | 348.8 | 567.62  | 199.782 | 436.842 | 2.19      | 8.934207489 |
| 1424975_at   | Siglec5                      | 216.9 | 344.6 | 350.3 | 319.6 | 256.16  | 673.6 | 891.7 | 578.84 | 575.2 | 519.53  | 297.516 | 647.764 | 2.18      | 2.226912301 |
| 1460330_at   | Anxa3                        | 516.7 | 2385  | 2747  | 1473  | 1421.09 | 4384  | 4305  | 3036.7 | 4153  | 2696.19 | 1708.56 | 3714.85 | 2.17      | 5.118264635 |
| 1448914_a_at | Csf1                         | 71.07 | 75.3  | 71.64 | 78.32 | 69.7    | 212.9 | 166.7 | 110.25 | 138.6 | 163.57  | 73.206  | 158.398 | 2.16      | 2.226912301 |
| 1423233_at   | Cebpd                        | 534.1 | 622.6 | 632.2 | 724.5 | 347.12  | 1500  | 1017  | 1229.9 | 1224  | 1200.69 | 572.098 | 1234.2  | 2.16      | 0           |
| 1421855_at   | Fgl2                         | 85.9  | 256.2 | 366.9 | 78.22 | 115.91  | 453.7 | 396.3 | 473.96 | 357.2 | 258.86  | 180.636 | 387.99  | 2.15      | 9.872171728 |
| 1424032_at   | Hvcn1                        | 260.6 | 458.9 | 476.1 | 258.5 | 297.24  | 910   | 717.7 | 806.97 | 696.6 | 628.28  | 350.256 | 751.902 | 2.15      | 1.132990469 |

Table S1. CMP to GMP transition gene signature in control mice.

**Genes up-regulated in GMPs compared to CMPs (= GMP gene signature)**

| Probe Set    | Gene Symbol                   | CMPs  |       |       |       |         | GMPs  |       |        |       |         | Av Cont | Av Mut  | Fold Diff | q-value(%)  |
|--------------|-------------------------------|-------|-------|-------|-------|---------|-------|-------|--------|-------|---------|---------|---------|-----------|-------------|
|              |                               | CMP3  | CMP4  | CMP6  | CMP8  | CMP10   | GMP3  | GMP4  | GMP6   | GMP8  | GMP10   |         |         |           |             |
| 1447253_x_at | Nup54                         | 116.7 | 119.9 | 149.8 | 130.1 | 154.6   | 235.9 | 199.2 | 440.09 | 258.2 | 304.76  | 134.214 | 287.636 | 2.14      | 5.986067289 |
| 1422645_at   | Hfe                           | 60    | 174.6 | 227   | 105.9 | 99.7    | 317   | 298   | 379.55 | 245.1 | 186.2   | 133.438 | 285.162 | 2.14      | 6.981670997 |
| 1419874_x_at | Zbtb16                        | 106   | 86.36 | 70.37 | 82.25 | 74.57   | 183.3 | 119.8 | 171.29 | 162.7 | 257.39  | 83.914  | 178.888 | 2.13      | 3.863788009 |
| 1441850_x_at | Tcn2                          | 332.4 | 353.8 | 262   | 340.6 | 241.86  | 642.7 | 635.8 | 663.76 | 682.5 | 635.38  | 306.126 | 652.016 | 2.13      | 0           |
| 1420678_a_at | Il17rb                        | 151.4 | 105.7 | 108.9 | 98.95 | 77.37   | 237.8 | 197.7 | 246.68 | 203.5 | 268.6   | 108.45  | 230.856 | 2.13      | 0           |
| 1423141_at   | Lipa                          | 165   | 207.6 | 183   | 244.5 | 248.04  | 245.5 | 342   | 651.78 | 436.2 | 554.45  | 209.614 | 445.982 | 2.13      | 8.934207489 |
| 1455282_x_at | Alas1                         | 365.6 | 573.7 | 690.6 | 340.1 | 333.13  | 1143  | 783.7 | 1017.8 | 975   | 976.56  | 460.624 | 979.236 | 2.13      | 1.132990469 |
| 1426261_s_at | LOC632297 /// Ugt1a1 /// Ugt1 | 98.4  | 260.8 | 372.7 | 206.3 | 221.16  | 431.4 | 471.2 | 449.67 | 676.3 | 434.43  | 231.86  | 492.576 | 2.12      | 3.863788009 |
| 1420981_a_at | Lmo4                          | 475.4 | 385.2 | 516.1 | 311.5 | 380.29  | 1319  | 966.2 | 615.78 | 657.7 | 825.38  | 413.712 | 876.848 | 2.12      | 6.981670997 |
| 1453120_at   | Txndc13                       | 786.9 | 3078  | 3415  | 1199  | 1755.83 | 4359  | 4772  | 4754.4 | 4751  | 3052.98 | 2046.95 | 4337.97 | 2.12      | 5.876757684 |
| 1455889_at   | Mlstd1                        | 60    | 60    | 60    | 60    | 60      | 164.4 | 99.94 | 173.91 | 137.4 | 60      | 60      | 127.14  | 2.12      | 8.934207489 |
| 1419029_at   | Ero1l                         | 123.9 | 409.6 | 431.7 | 341.7 | 258.18  | 560.4 | 474.1 | 898.01 | 730.4 | 647.49  | 313.01  | 662.07  | 2.12      | 5.118264635 |
| 1423239_at   | Impdh1                        | 641.4 | 998.8 | 989.3 | 1238  | 1238.76 | 1140  | 1813  | 2559.4 | 2382  | 2848.12 | 1021.21 | 2148.5  | 2.10      | 6.981670997 |
| 1436305_at   | Rnf217                        | 60    | 101.8 | 109.8 | 74.13 | 91.33   | 161.1 | 168.1 | 200.75 | 175.5 | 213.54  | 87.41   | 183.778 | 2.10      | 0           |
| 1426223_at   | 2810439F02Rik                 | 60    | 104.5 | 121.8 | 60    | 60      | 187.9 | 201.3 | 170.19 | 185.5 | 106.15  | 81.254  | 170.22  | 2.09      | 3.863788009 |
| 1434197_at   | Atrn                          | 60    | 113.4 | 241.2 | 79.2  | 155.63  | 309.1 | 221.2 | 323.57 | 309.9 | 194.84  | 129.874 | 271.704 | 2.09      | 6.981670997 |
| 1419609_at   | Ccr1                          | 86.76 | 478.9 | 387.7 | 312.6 | 398.65  | 622.3 | 904.8 | 436.75 | 851.9 | 655.77  | 332.93  | 694.312 | 2.09      | 8.035551262 |
| 1442118_at   | ---                           | 60    | 65.72 | 95.03 | 77.71 | 64.17   | 156.6 | 100.1 | 149.05 | 174   | 176.43  | 72.526  | 151.248 | 2.09      | 1.832069694 |
| 1424783_a_at | LOC632297 /// Ugt1a1 /// Ugt1 | 1135  | 2376  | 2573  | 3141  | 2096.82 | 2193  | 4430  | 5732.3 | 5397  | 5825.6  | 2264.43 | 4715.57 | 2.08      | 8.934207489 |
| 1421824_at   | Bace1                         | 165.1 | 399.6 | 457.4 | 203.1 | 224.61  | 575.1 | 616.9 | 705.49 | 679.5 | 439.79  | 289.95  | 603.348 | 2.08      | 3.376755907 |
| 1456735_x_at | Acpl2                         | 1021  | 1372  | 1864  | 1767  | 1016.56 | 2010  | 2590  | 4667.2 | 2917  | 2418.72 | 1408.02 | 2920.46 | 2.07      | 9.872171728 |
| 1457825_x_at | Tcn2                          | 859.8 | 737.5 | 530.9 | 860   | 597.05  | 1561  | 1286  | 1627.2 | 1521  | 1413.24 | 717.044 | 1481.79 | 2.07      | 0           |
| 1449233_at   | Bhlhb8                        | 105.4 | 157.3 | 138.7 | 158.1 | 131.47  | 283.8 | 195.4 | 378.01 | 252   | 311.46  | 138.18  | 284.122 | 2.06      | 2.81898819  |
| 1441962_at   | Alox5                         | 253.5 | 346.1 | 242.1 | 492.8 | 270.33  | 567.4 | 658.6 | 594.77 | 634.3 | 841.79  | 320.97  | 659.374 | 2.05      | 1.832069694 |
| 1415901_at   | Plod3                         | 628.7 | 1035  | 1053  | 839.1 | 887.87  | 1723  | 1798  | 1732.5 | 2182  | 1686.6  | 888.596 | 1824.38 | 2.05      | 0           |
| 1460273_a_at | Naip2                         | 335.1 | 304.6 | 238.3 | 201.6 | 119.26  | 439.9 | 411   | 609.46 | 500.4 | 498.59  | 239.768 | 491.858 | 2.05      | 2.226912301 |
| 1448200_at   | Tcn2                          | 353.6 | 751.2 | 628.9 | 647.3 | 620.32  | 1301  | 1307  | 1028.1 | 1456  | 1060.27 | 600.254 | 1230.52 | 2.05      | 1.132990469 |
| 1450639_at   | RP23-357114.1 /// Slc28a2     | 220.4 | 406.7 | 491.3 | 274.8 | 256.34  | 754.4 | 773.4 | 606.83 | 724.8 | 503.5   | 329.9   | 672.57  | 2.04      | 2.226912301 |
| 1457270_at   | Gas7                          | 60    | 60    | 64.76 | 63.65 | 60      | 115.9 | 80.58 | 190.69 | 105.1 | 135.43  | 61.682  | 125.532 | 2.04      | 6.981670997 |
| 1460401_at   | Edem3                         | 562.1 | 750.5 | 1049  | 661.8 | 980.62  | 2141  | 2003  | 931.18 | 1717  | 1344.08 | 800.782 | 1627.22 | 2.03      | 6.981670997 |
| 1441412_s_at | Trim45                        | 290.4 | 347.3 | 276.9 | 257.6 | 183.66  | 555.3 | 492.1 | 637.19 | 562.8 | 496.34  | 271.186 | 548.722 | 2.02      | 0           |
| 1428749_at   | Dmxl2                         | 60    | 86.47 | 100.3 | 60    | 67.34   | 143.5 | 105.4 | 199.75 | 167   | 137.76  | 74.812  | 150.66  | 2.01      | 3.376755907 |
| 1435476_a_at | Fcgr2b                        | 258.6 | 542.5 | 626.6 | 611.4 | 719.98  | 901.1 | 1058  | 1163.1 | 1211  | 1221.02 | 551.812 | 1110.83 | 2.01      | 1.132990469 |
| 1419078_at   | Nin                           | 136.7 | 409.2 | 428.8 | 325.9 | 251.31  | 696   | 633   | 640.22 | 637.1 | 513.56  | 310.384 | 623.97  | 2.01      | 1.832069694 |
| 1435259_s_at | Tmem141                       | 151.4 | 231.6 | 186.2 | 220.1 | 154.4   | 425.2 | 360   | 428.4  | 340   | 340.77  | 188.718 | 378.87  | 2.01      | 0           |
| 1434362_at   | ---                           | 363.1 | 460.6 | 641   | 672.7 | 513.61  | 664.7 | 738.5 | 1559.6 | 1154  | 1200.82 | 530.192 | 1063.48 | 2.01      | 9.872171728 |
| 1442798_x_at | Hk3                           | 2263  | 2438  | 2403  | 2490  | 1416.92 | 4210  | 4162  | 5371.1 | 4026  | 4266.74 | 2202.23 | 4407.21 | 2.00      | 0           |



Table S1. CMP to GMP transition gene signature in control mice.

**Genes up-regulated in GMPs compared to CMPs (= GMP gene signature)**

| Probe Set    | Gene Symbol             | CMPs  |       |       |       |         | GMPs  |       |        |       |         | Av Cont | Av Mut  | Fold Diff | q-value(%)  |
|--------------|-------------------------|-------|-------|-------|-------|---------|-------|-------|--------|-------|---------|---------|---------|-----------|-------------|
|              |                         | CMP3  | CMP4  | CMP6  | CMP8  | CMP10   | GMP3  | GMP4  | GMP6   | GMP8  | GMP10   |         |         |           |             |
| 1428154_s_at | Ppapdc1                 | 171.2 | 284.8 | 334.9 | 118   | 167.91  | 404.1 | 410.7 | 519.61 | 469.3 | 350.08  | 215.36  | 430.768 | 2.00      | 3.376755907 |
| 1456792_at   | LOC100045317 /// Tbc1d2 | 395.5 | 342.4 | 266.9 | 349.1 | 262.63  | 516.8 | 488.4 | 655.03 | 812.6 | 759.9   | 323.302 | 646.524 | 2.00      | 2.460207875 |
| 1418982_at   | Cebpa                   | 936.1 | 676.9 | 1026  | 1058  | 1150    | 1138  | 1688  | 2388.4 | 1913  | 2566.17 | 969.456 | 1938.55 | 2.00      | 5.986067289 |
| 1433833_at   | Fndc3b                  | 309.1 | 516.8 | 684   | 587.8 | 520.37  | 875   | 782.9 | 1358.7 | 1013  | 1203.57 | 523.622 | 1046.7  | 2.00      | 3.376755907 |
| 1455737_at   | Ppm1h                   | 676.2 | 1110  | 1517  | 1330  | 1355    | 1626  | 1731  | 3260.6 | 2663  | 2641.37 | 1197.56 | 2384.48 | 1.99      | 6.981670997 |
| 1431167_at   | Dgkg                    | 123   | 150.5 | 117.1 | 67.69 | 67.15   | 229   | 167.5 | 225.26 | 226.1 | 192.91  | 105.098 | 208.142 | 1.98      | 1.832069694 |
| 1434559_at   | Stx3                    | 60    | 137.3 | 181.1 | 78.42 | 141.37  | 285   | 215.1 | 172.02 | 281.1 | 221.05  | 119.622 | 234.844 | 1.96      | 5.876757684 |
| 1448355_at   | Prss16                  | 79.36 | 111.5 | 144.7 | 123   | 125.26  | 209.5 | 146.8 | 320.6  | 206.1 | 262.49  | 116.75  | 229.104 | 1.96      | 5.986067289 |
| 1448377_at   | Slpi                    | 1315  | 1960  | 1567  | 1537  | 1495.23 | 2103  | 2670  | 4525.1 | 3023  | 3100.8  | 1574.64 | 3084.34 | 1.96      | 5.986067289 |
| 1429190_at   | Arsb                    | 60    | 79.1  | 71.04 | 63.91 | 60      | 166.3 | 120.8 | 169.05 | 103.6 | 91.77   | 66.81   | 130.31  | 1.95      | 5.118264635 |
| 1454901_at   | Ypel2                   | 60    | 84.52 | 105.7 | 67.29 | 60      | 96.22 | 128.6 | 199.69 | 175.7 | 135.87  | 75.496  | 147.21  | 1.95      | 5.986067289 |
| 1455763_at   | Rnf41                   | 60    | 111.5 | 127   | 149.1 | 142.56  | 188.2 | 167.3 | 311.42 | 197.4 | 274.35  | 118.032 | 227.728 | 1.93      | 6.981670997 |
| 1455436_at   | Diras2                  | 166.3 | 167.5 | 139.7 | 103   | 136.17  | 329.1 | 225.2 | 245.7  | 245.5 | 326.98  | 142.528 | 274.504 | 1.93      | 1.832069694 |
| 1451006_at   | Xdh                     | 60    | 65.89 | 85.56 | 60    | 60      | 115.8 | 113.7 | 112.43 | 199.9 | 95.26   | 66.29   | 127.41  | 1.92      | 8.934207489 |
| 1416737_at   | Gys1                    | 227.4 | 402.6 | 425   | 475.7 | 346.75  | 577.1 | 554.6 | 934.35 | 830.8 | 698.71  | 375.492 | 719.116 | 1.92      | 3.863788009 |
| 1455660_at   | Csf2rb                  | 383.3 | 914.6 | 1367  | 1067  | 1290.63 | 1833  | 1625  | 1937   | 2192  | 2028.83 | 1004.48 | 1923.17 | 1.91      | 2.460207875 |
| 1431188_a_at | EG545878 /// Tom1       | 83.17 | 171   | 239.7 | 163.1 | 202.65  | 267.3 | 254.9 | 450.54 | 365.6 | 302.62  | 171.934 | 328.184 | 1.91      | 6.981670997 |
| 1439814_at   | Atp8b4                  | 1581  | 2470  | 3327  | 2422  | 2478.05 | 4365  | 5268  | 4634.8 | 4644  | 4407.45 | 2455.64 | 4663.85 | 1.90      | 0           |
| 1433832_at   | Unc84b                  | 2035  | 3390  | 3454  | 4596  | 3595.96 | 4592  | 5028  | 8254.9 | 7384  | 7111.18 | 3414.22 | 6473.92 | 1.90      | 5.876757684 |
| 1434630_at   | Ankrd28                 | 208.1 | 617.9 | 734.9 | 452.7 | 570.95  | 691   | 1094  | 1135.4 | 1013  | 937.09  | 516.88  | 974.102 | 1.88      | 5.118264635 |
| 1455332_x_at | Fcgr2b                  | 60    | 336.3 | 394.9 | 228   | 277.09  | 459.7 | 572   | 545.73 | 528.5 | 326.57  | 259.258 | 486.5   | 1.88      | 8.934207489 |
| 1458040_at   | ---                     | 101.9 | 96.96 | 105.6 | 93.52 | 86.25   | 185.7 | 130.8 | 208.36 | 171.4 | 212.36  | 96.854  | 181.718 | 1.88      | 1.132990469 |
| 1437119_at   | Ern1                    | 740.5 | 2657  | 2991  | 2626  | 2819.85 | 2934  | 4170  | 5911.1 | 4559  | 4550.01 | 2367.03 | 4424.78 | 1.87      | 8.035551262 |
| 1418099_at   | Tnfrsf1b                | 271.9 | 704.5 | 621.4 | 519.8 | 723.75  | 1100  | 799.2 | 1317.9 | 1006  | 1087.01 | 568.272 | 1062.05 | 1.87      | 3.376755907 |
| 1427484_at   | Eml5                    | 84.69 | 60    | 63.14 | 61.52 | 60      | 105.6 | 79.84 | 169.86 | 134.5 | 123.7   | 65.87   | 122.69  | 1.86      | 5.986067289 |
| 1447284_at   | Trem1                   | 165.8 | 206.8 | 251.7 | 252.4 | 220.83  | 278.6 | 365.2 | 538.64 | 424.8 | 425.45  | 219.496 | 406.532 | 1.85      | 3.863788009 |
| 1433772_at   | Stch                    | 457.1 | 1094  | 1538  | 885.7 | 1151.91 | 1701  | 1697  | 2474.4 | 2056  | 1538.74 | 1025.49 | 1893.33 | 1.85      | 5.986067289 |
| 1424431_at   | Csgalnact2              | 1117  | 1724  | 2207  | 1173  | 1441.39 | 2786  | 3842  | 2576.7 | 2627  | 2307.42 | 1532.28 | 2827.79 | 1.85      | 5.118264635 |
| 1437868_at   | BC023892                | 831   | 749.4 | 624.7 | 932.4 | 633.37  | 1055  | 1378  | 1539.6 | 1494  | 1489.93 | 754.158 | 1391.21 | 1.84      | 1.132990469 |
| 1447800_x_at | ---                     | 3733  | 2702  | 1811  | 3498  | 2154.78 | 4861  | 4522  | 5760.9 | 4514  | 5935.44 | 2780.02 | 5118.54 | 1.84      | 2.226912301 |
| 1448470_at   | Fbp1                    | 133.7 | 240.1 | 247.2 | 299.9 | 216.4   | 378.6 | 427.4 | 625.9  | 315.2 | 341.31  | 227.468 | 417.688 | 1.84      | 9.872171728 |
| 1434418_at   | Lass6                   | 155.1 | 280.9 | 361.9 | 238.6 | 235.27  | 429.7 | 458.1 | 656.6  | 427.4 | 360.87  | 254.344 | 466.542 | 1.83      | 6.981670997 |
| 1429352_at   | Mocos                   | 83.83 | 96.05 | 120.5 | 136.4 | 116.04  | 175.4 | 180.8 | 232.01 | 204.7 | 219.8   | 110.58  | 202.538 | 1.83      | 0           |
| 1458718_at   | ---                     | 249   | 343.9 | 386.7 | 408.7 | 299.51  | 432.4 | 474.1 | 776.85 | 685.6 | 718.39  | 337.568 | 617.446 | 1.83      | 5.876757684 |
| 1415741_at   | Tmem165                 | 922.6 | 2398  | 3203  | 1442  | 2608.05 | 2887  | 3419  | 4931.8 | 4591  | 3499.61 | 2114.8  | 3865.64 | 1.83      | 9.872171728 |
| 1428129_at   | Lman1                   | 77.99 | 146.2 | 153.9 | 79.56 | 97.47   | 198.3 | 187.8 | 245.28 | 201.9 | 175.1   | 111.03  | 201.67  | 1.82      | 2.81898819  |
| 1416635_at   | Smpdl3a                 | 653.3 | 714.4 | 659   | 316.1 | 407.54  | 1126  | 1100  | 1114.8 | 919.5 | 727.3   | 550.074 | 997.444 | 1.81      | 3.863788009 |

Table S1. CMP to GMP transition gene signature in control mice.

**Genes up-regulated in GMPs compared to CMPs (= GMP gene signature)**

| Probe Set    | Gene Symbol                   | CMPs  |       |       |       |         | GMPs  |       |        |       |         | Av Cont | Av Mut  | Fold Diff | q-value(%)  |
|--------------|-------------------------------|-------|-------|-------|-------|---------|-------|-------|--------|-------|---------|---------|---------|-----------|-------------|
|              |                               | CMP3  | CMP4  | CMP6  | CMP8  | CMP10   | GMP3  | GMP4  | GMP6   | GMP8  | GMP10   |         |         |           |             |
| 1435084_at   | C730049O14Rik                 | 1973  | 2329  | 1040  | 1173  | 1047.82 | 2322  | 3294  | 3051.4 | 2499  | 2545.46 | 1512.52 | 2742.48 | 1.81      | 5.876757684 |
| 1449983_a_at | Nqo2                          | 60    | 153.8 | 168.6 | 131.3 | 113.54  | 217.4 | 186.3 | 319.26 | 211.6 | 195.99  | 125.44  | 226.104 | 1.80      | 8.035551262 |
| 1426260_a_at | LOC632297 /// Ugt1a1 /// Ugt1 | 617.6 | 1771  | 2693  | 1537  | 2020.72 | 2926  | 2708  | 2919   | 4136  | 2876.55 | 1727.94 | 3113.05 | 1.80      | 8.934207489 |
| 1424650_at   | Pdia5                         | 256.2 | 564   | 494.8 | 506.8 | 510.87  | 854.5 | 668.4 | 917.18 | 910.5 | 841.68  | 466.538 | 838.462 | 1.80      | 1.832069694 |
| 1449084_s_at | Sh3d19                        | 118.1 | 110.6 | 131.6 | 60    | 60      | 253.8 | 157   | 157.82 | 155.9 | 138.55  | 96.05   | 172.612 | 1.80      | 11.33922971 |
| 1444040_at   | Lair1                         | 103.3 | 104.7 | 109.1 | 60    | 66.79   | 197.3 | 127.8 | 213.33 | 158.2 | 99.91   | 88.782  | 159.282 | 1.79      | 11.33922971 |
| 1438164_x_at | Flot2                         | 2597  | 1999  | 1532  | 2743  | 1314.51 | 2811  | 2835  | 4648.2 | 3684  | 4292.65 | 2037.26 | 3654.08 | 1.79      | 6.981670997 |
| 1446434_at   | ---                           | 125.6 | 367.6 | 326.9 | 320   | 250.92  | 385.1 | 362.6 | 594.71 | 490   | 658.93  | 278.186 | 498.254 | 1.79      | 9.872171728 |
| 1460252_s_at | Zfp105                        | 70.11 | 60    | 87.07 | 74.46 | 75.9    | 137.3 | 69.54 | 124.3  | 179.5 | 147.3   | 73.508  | 131.596 | 1.79      | 9.872171728 |
| 1426350_at   | Mgat2                         | 270   | 230.6 | 393.9 | 280.8 | 313.84  | 372.1 | 507.6 | 646.03 | 505.8 | 622.62  | 297.832 | 530.816 | 1.78      | 3.863788009 |
| 1419202_at   | Cst7                          | 3028  | 7742  | 6351  | 4731  | 5321.8  | 12432 | 12004 | 7576.5 | 9440  | 6849.75 | 5434.66 | 9660.49 | 1.78      | 9.872171728 |
| 1452054_at   | Ube2w                         | 331.4 | 315.3 | 370.7 | 362.4 | 342.33  | 430.1 | 551.9 | 773.96 | 608.7 | 689.3   | 344.436 | 610.78  | 1.77      | 2.81898819  |
| 1416843_at   | Pde6d                         | 341   | 433.9 | 412.1 | 309.9 | 269.32  | 880   | 729.8 | 482.37 | 605.6 | 427.21  | 353.234 | 624.982 | 1.77      | 9.872171728 |
| 1435490_at   | Hk3                           | 1026  | 2371  | 2773  | 1668  | 1329.12 | 4064  | 3615  | 2524.4 | 3583  | 2399.9  | 1833.33 | 3237.32 | 1.77      | 9.872171728 |
| 1445181_at   | Eml5                          | 66.9  | 86.47 | 94.12 | 74.23 | 91.62   | 115.2 | 109.7 | 197.29 | 152   | 155.25  | 82.668  | 145.886 | 1.76      | 5.876757684 |
| 1452783_at   | Fndc3b                        | 60    | 171.3 | 188.8 | 111.7 | 153.75  | 193.7 | 208.1 | 296.34 | 282   | 225.15  | 137.106 | 241.06  | 1.76      | 8.035551262 |
| 1417544_a_at | Flot2                         | 736.1 | 756.4 | 754.2 | 735   | 861.83  | 1112  | 1309  | 1606.6 | 1418  | 1298.99 | 768.712 | 1349.07 | 1.75      | 0           |
| 1428544_at   | 0610007L01Rik                 | 378.5 | 549.1 | 542   | 491.4 | 434.99  | 669.2 | 659.9 | 1075.7 | 899.8 | 891.66  | 479.192 | 839.264 | 1.75      | 3.376755907 |
| 1448744_at   | Galns                         | 159.5 | 255.3 | 306.5 | 284   | 250.08  | 472.8 | 436.9 | 384.63 | 439.9 | 462.67  | 251.084 | 439.38  | 1.75      | 0           |
| 1416381_a_at | Prdx5                         | 2318  | 2461  | 2466  | 2435  | 2194.66 | 3355  | 3569  | 5674.1 | 4516  | 3645.77 | 2374.97 | 4151.83 | 1.75      | 3.863788009 |
| 1425128_at   | B3gnt8                        | 77.11 | 128.9 | 157.4 | 151.4 | 116.7   | 253.2 | 220.2 | 213.86 | 205.5 | 210.07  | 126.294 | 220.562 | 1.75      | 1.132990469 |
| 1437956_at   | Pik3r6                        | 71.92 | 102.9 | 174.6 | 83.9  | 97.67   | 217.7 | 142.3 | 225.39 | 193.8 | 146.68  | 106.188 | 185.18  | 1.74      | 8.934207489 |
| 1418076_at   | St14                          | 215.4 | 232.6 | 185.4 | 246.6 | 152.43  | 389   | 237.9 | 485.93 | 334.9 | 350.79  | 206.494 | 359.688 | 1.74      | 6.981670997 |
| 1416382_at   | Ctsc                          | 1724  | 2560  | 3354  | 1950  | 2877.7  | 3580  | 4684  | 4909.5 | 4882  | 3621.81 | 2492.85 | 4335.29 | 1.74      | 2.918890699 |
| 1448123_s_at | Tgfb1                         | 270.6 | 166   | 305.7 | 370   | 249.55  | 479.5 | 350.5 | 371.5  | 625.2 | 535.04  | 272.392 | 472.36  | 1.73      | 8.035551262 |
| 1419030_at   | Ero1l                         | 60    | 96.5  | 173.3 | 74.29 | 85.8    | 165.6 | 162   | 198.33 | 179.9 | 139.72  | 97.968  | 169.1   | 1.73      | 8.934207489 |
| 1430718_s_at | Dph4                          | 176.3 | 367.9 | 423.6 | 369.8 | 346.24  | 436.1 | 544.9 | 777.97 | 573.1 | 552.22  | 336.762 | 576.846 | 1.71      | 6.981670997 |
| 1456980_at   | 9830134C10Rik                 | 1093  | 1080  | 1204  | 1192  | 1382.41 | 2052  | 2216  | 1203   | 2159  | 2552.64 | 1190.29 | 2036.64 | 1.71      | 5.876757684 |
| 1448439_at   | D17Wsu104e                    | 703.9 | 714.8 | 797.9 | 634   | 690.53  | 1116  | 778.8 | 1766.3 | 1182  | 1194.98 | 708.196 | 1207.53 | 1.71      | 9.872171728 |
| 1449324_at   | Ero1l                         | 506.1 | 766   | 1018  | 661.7 | 687.14  | 1069  | 1040  | 1521   | 1510  | 1057.12 | 727.862 | 1239.43 | 1.70      | 5.986067289 |
| 1429863_at   | Lonrf3                        | 60    | 99.63 | 115.2 | 76.61 | 65.87   | 148.7 | 116.1 | 150.21 | 156   | 134.5   | 83.462  | 141.112 | 1.69      | 2.81898819  |
| 1435091_at   | Zfp568                        | 337.8 | 570.4 | 573.3 | 561.4 | 637.56  | 634.3 | 727.5 | 1228.5 | 917   | 1014.86 | 536.088 | 904.442 | 1.69      | 8.934207489 |
| 1424835_at   | Gstm4                         | 294.1 | 281.7 | 241.6 | 324.1 | 252.74  | 316   | 365.1 | 646.72 | 519.4 | 491.6   | 278.836 | 467.76  | 1.68      | 9.872171728 |
| 1423706_a_at | Pgd                           | 1698  | 2622  | 3949  | 2346  | 3305.37 | 4070  | 3962  | 5665.7 | 5469  | 4077.84 | 2784.18 | 4648.96 | 1.67      | 6.981670997 |
| 1417110_at   | Man1a                         | 146.7 | 566.2 | 559.4 | 459.5 | 413.5   | 784.6 | 707.3 | 627.81 | 839.4 | 612.35  | 429.058 | 714.276 | 1.66      | 8.934207489 |
| 1454934_at   | Ppm1f                         | 481.3 | 697.1 | 775.1 | 643.5 | 708.09  | 1169  | 1018  | 1010.2 | 1117  | 1176.52 | 661.028 | 1098.05 | 1.66      | 0           |
| 1437225_x_at | Gnai3                         | 93.12 | 113.5 | 123.1 | 69.5  | 85.27   | 180.5 | 170.3 | 154.45 | 200.6 | 98.77   | 96.892  | 160.908 | 1.66      | 8.934207489 |

Table S1. CMP to GMP transition gene signature in control mice.

**Genes up-regulated in GMPs compared to CMPs (= GMP gene signature)**

| Probe Set    | Gene Symbol             | CMPs  |       |       |       |         | GMPs  |       |        |       |         | Av Cont | Av Mut  | Fold Diff | q-value(%)  |
|--------------|-------------------------|-------|-------|-------|-------|---------|-------|-------|--------|-------|---------|---------|---------|-----------|-------------|
|              |                         | CMP3  | CMP4  | CMP6  | CMP8  | CMP10   | GMP3  | GMP4  | GMP6   | GMP8  | GMP10   |         |         |           |             |
| 1423883_at   | Acsl1                   | 1250  | 1593  | 1084  | 1424  | 1057.19 | 1698  | 1870  | 2522.1 | 2482  | 2056.38 | 1281.69 | 2125.62 | 1.66      | 2.918890699 |
| 1420703_at   | Csf2ra                  | 395.1 | 423.8 | 426.6 | 293.2 | 250.29  | 577.9 | 707.4 | 623.73 | 506.1 | 538.67  | 357.784 | 590.77  | 1.65      | 2.460207875 |
| 1425448_x_at | Atp6v0b                 | 303.4 | 268.4 | 244.8 | 379.2 | 306.13  | 431.5 | 373.2 | 633.92 | 501   | 521.82  | 300.388 | 492.288 | 1.64      | 5.118264635 |
| 1416917_at   | 1700123O20Rik           | 1210  | 1695  | 1645  | 1102  | 1501.06 | 2997  | 2700  | 1759.7 | 2457  | 1808.18 | 1430.52 | 2344.36 | 1.64      | 8.035551262 |
| 1421947_at   | Gng12                   | 1029  | 982.3 | 891.3 | 839.3 | 729.85  | 1709  | 2002  | 1209.8 | 1204  | 1198.74 | 894.306 | 1464.89 | 1.64      | 8.035551262 |
| 1417588_at   | Galnt3                  | 124.9 | 159.1 | 177.2 | 154.8 | 141.32  | 180.2 | 200   | 315.66 | 264   | 278.74  | 151.458 | 247.716 | 1.64      | 5.986067289 |
| 1422519_at   | Cask                    | 91.46 | 118.6 | 126.4 | 179.4 | 152.18  | 169.2 | 188.1 | 266.24 | 263.9 | 199.24  | 133.602 | 217.34  | 1.63      | 8.035551262 |
| 1447842_x_at | ---                     | 1867  | 1434  | 930   | 2100  | 1177.27 | 2104  | 2180  | 2608.3 | 2576  | 2677.77 | 1501.71 | 2429.13 | 1.62      | 5.876757684 |
| 1416108_a_at | Tmed3                   | 3319  | 4719  | 4586  | 2916  | 2942.33 | 7167  | 5704  | 6752.4 | 5404  | 4835.52 | 3696.36 | 5972.55 | 1.62      | 5.118264635 |
| 1417191_at   | Dnajb9                  | 364   | 655.4 | 656.8 | 509.1 | 865.43  | 850.1 | 843.3 | 1260.3 | 907.1 | 1063.78 | 610.148 | 984.91  | 1.61      | 8.934207489 |
| 1418437_a_at | Mlx                     | 389.5 | 401   | 475.6 | 410.6 | 410.35  | 461.2 | 586.4 | 793.85 | 849   | 675.09  | 417.396 | 673.094 | 1.61      | 5.986067289 |
| 1416392_a_at | Atp6v0c /// Atp6v0c-ps2 | 4472  | 4823  | 6349  | 5708  | 5662.34 | 7115  | 7190  | 10429  | 9916  | 8893.57 | 5402.97 | 8708.75 | 1.61      | 2.918890699 |
| 1417441_at   | Dnajc12                 | 188.5 | 502.4 | 367.7 | 271.6 | 274.55  | 434   | 492.7 | 628.97 | 572   | 455.62  | 320.956 | 516.664 | 1.61      | 9.872171728 |
| 1455164_at   | Cdgap                   | 110.7 | 330.8 | 340.8 | 279.7 | 259.48  | 456.1 | 415.6 | 498.98 | 385.7 | 364.35  | 264.296 | 424.142 | 1.60      | 8.035551262 |
| 1436915_x_at | Laptm4b                 | 136.2 | 194.6 | 212.3 | 274.7 | 162.52  | 260.8 | 327.7 | 426.06 | 253.4 | 303.58  | 196.056 | 314.298 | 1.60      | 9.872171728 |
| 1416654_at   | Slc31a2                 | 111.1 | 232   | 260.3 | 275.9 | 252.54  | 301   | 332.1 | 430.86 | 335.5 | 414.78  | 226.348 | 362.856 | 1.60      | 6.981670997 |
| 1433806_x_at | Calr                    | 6659  | 9057  | 10650 | 9381  | 9239.85 | 13307 | 11806 | 15066  | 15398 | 16536.8 | 8997.16 | 14422.8 | 1.60      | 1.832069694 |
| 1449259_at   | Rab3d                   | 617.4 | 559.9 | 500.7 | 641.5 | 408.64  | 869.7 | 688.5 | 974.86 | 843.2 | 974.11  | 545.64  | 870.058 | 1.59      | 2.226912301 |
| 1417205_at   | Kdelr2                  | 219   | 405.4 | 471.2 | 359.6 | 346.43  | 452.7 | 559.8 | 659.67 | 682.3 | 513.39  | 360.322 | 573.558 | 1.59      | 5.986067289 |
| 1439616_at   | ---                     | 613.9 | 625.5 | 536.8 | 807.7 | 415.21  | 681.9 | 944.8 | 1066.8 | 934.8 | 1123.99 | 599.814 | 950.448 | 1.58      | 5.986067289 |
| 1428600_at   | Nin                     | 658.9 | 1066  | 1079  | 922.1 | 1107.93 | 1117  | 1453  | 1693.2 | 1908  | 1462.3  | 966.804 | 1526.64 | 1.58      | 5.986067289 |
| 1447846_x_at | Mboat7                  | 127.8 | 129.5 | 108.3 | 120   | 115.23  | 142   | 156.6 | 236.29 | 198.4 | 212.41  | 120.164 | 189.148 | 1.57      | 5.118264635 |
| 1451000_at   | Tmem126a                | 1390  | 1559  | 1607  | 1707  | 1401.75 | 1872  | 2517  | 2504.3 | 2554  | 2612.86 | 1532.83 | 2412.12 | 1.57      | 1.132990469 |
| 1426746_at   | 1810026J23Rik           | 784.1 | 1753  | 2021  | 1515  | 2139.7  | 2077  | 2384  | 3071   | 2655  | 2725.01 | 1642.64 | 2582.2  | 1.57      | 8.934207489 |
| 1431997_at   | 3000002C10Rik           | 683.8 | 729.8 | 952.8 | 665.4 | 1063.65 | 1092  | 1347  | 1252.3 | 1519  | 1211.27 | 819.094 | 1284.47 | 1.57      | 2.918890699 |
| 1417266_at   | Ccl6                    | 195.6 | 111.3 | 249.4 | 268.3 | 252.54  | 253.4 | 329.8 | 414.44 | 333.7 | 357.53  | 215.44  | 337.768 | 1.57      | 8.934207489 |
| 1452281_at   | Sos2                    | 266   | 257.1 | 367   | 163.1 | 274.51  | 392.7 | 499.1 | 442.65 | 366   | 378.83  | 265.536 | 415.844 | 1.57      | 5.876757684 |
| 1427509_at   | Baiap3                  | 97.49 | 97.37 | 80.16 | 92.69 | 88.77   | 137.5 | 148.6 | 148.66 | 120.8 | 158.65  | 91.296  | 142.846 | 1.56      | 0           |
| 1452283_at   | Rassf8                  | 128.1 | 208   | 250   | 173.7 | 175.26  | 276   | 258.8 | 356.44 | 282.6 | 288.14  | 187.008 | 292.388 | 1.56      | 4.305363781 |
| 1437968_at   | Grin1                   | 82.05 | 91.54 | 78.63 | 130.7 | 104.59  | 124.8 | 122.3 | 192.21 | 155.2 | 166.6   | 97.51   | 152.226 | 1.56      | 8.035551262 |
| 1416592_at   | Glxr                    | 722   | 1052  | 934.9 | 866.7 | 737.97  | 1182  | 1645  | 1551.7 | 1297  | 1051.62 | 862.778 | 1345.39 | 1.56      | 5.876757684 |
| 1418520_at   | LOC100038890 /// Tgoln1 | 60.55 | 128.9 | 105.3 | 70.92 | 90.31   | 149.8 | 164   | 120.46 | 164   | 108.85  | 91.182  | 141.424 | 1.55      | 11.33922971 |
| 1425099_a_at | Arntl                   | 122.3 | 173.3 | 183.7 | 183   | 246.92  | 249.6 | 307.6 | 289.05 | 283.3 | 275.8   | 181.838 | 281.048 | 1.55      | 2.81898819  |
| 1437434_a_at | Gpr177                  | 228.1 | 336.1 | 331.2 | 215.4 | 247.36  | 428.6 | 366   | 484.05 | 456.6 | 362.95  | 271.644 | 419.634 | 1.54      | 3.863788009 |
| 1439456_x_at | Atp6ap2                 | 8128  | 9584  | 10144 | 8972  | 8079.3  | 10874 | 11382 | 18262  | 13944 | 14907.1 | 8981.45 | 13873.8 | 1.54      | 5.986067289 |
| 1429123_at   | Rab27a                  | 1042  | 1152  | 1050  | 834.8 | 1071.28 | 1545  | 1286  | 1661.4 | 2040  | 1411.05 | 1030.05 | 1588.8  | 1.54      | 4.305363781 |
| 1433451_at   | Cdk5r1                  | 338.1 | 339.6 | 270   | 343.5 | 247.97  | 417.4 | 352.4 | 587.34 | 502.3 | 509.33  | 307.832 | 473.744 | 1.54      | 5.876757684 |

Table S1. CMP to GMP transition gene signature in control mice.

**Genes up-regulated in GMPs compared to CMPs (= GMP gene signature)**

| Probe Set    | Gene Symbol              | CMPs  |       |       |       |         | GMPs  |       |        |       |         | Av Cont | Av Mut  | Fold Diff | q-value(%)  |
|--------------|--------------------------|-------|-------|-------|-------|---------|-------|-------|--------|-------|---------|---------|---------|-----------|-------------|
|              |                          | CMP3  | CMP4  | CMP6  | CMP8  | CMP10   | GMP3  | GMP4  | GMP6   | GMP8  | GMP10   |         |         |           |             |
| 1434589_x_at | Surf4                    | 1285  | 859.8 | 850   | 1121  | 849.92  | 1587  | 1337  | 1704.7 | 1331  | 1671.45 | 993.178 | 1526.24 | 1.54      | 2.918890699 |
| 1428643_at   | Mgat5                    | 1138  | 1456  | 1779  | 1569  | 1268.38 | 1809  | 2585  | 2612.2 | 2095  | 1956.94 | 1441.92 | 2211.56 | 1.53      | 5.118264635 |
| 1424988_at   | Myliip                   | 507.9 | 426.4 | 457.8 | 469.2 | 605.59  | 960.8 | 747.8 | 640.22 | 711.7 | 710.06  | 493.384 | 754.102 | 1.53      | 3.863788009 |
| 1425215_at   | Ffar2                    | 275.3 | 320.6 | 332.9 | 259.4 | 265.44  | 438.3 | 423.5 | 483.08 | 372.8 | 496.03  | 290.706 | 442.74  | 1.52      | 1.132990469 |
| 1434642_at   | Hsd17b11                 | 4448  | 5091  | 3460  | 4806  | 3122.3  | 7089  | 5660  | 6995.1 | 5626  | 6224.98 | 4185.49 | 6319.1  | 1.51      | 3.376755907 |
| 1426440_at   | Dhrs7                    | 320.9 | 618.1 | 719.2 | 629.2 | 742.3   | 809.1 | 742.2 | 1060.7 | 1078  | 883.64  | 605.926 | 914.74  | 1.51      | 9.872171728 |
| 1416511_a_at | Cdc42ep4                 | 245.8 | 344.9 | 255.1 | 227.8 | 255.74  | 446   | 436   | 399.22 | 377.3 | 346.82  | 265.864 | 401.068 | 1.51      | 2.226912301 |
| 1437688_x_at | Atp6ap2                  | 9922  | 12805 | 11710 | 10644 | 10551.1 | 14054 | 14720 | 20000  | 17022 | 18104.8 | 11126.3 | 16780.3 | 1.51      | 2.460207875 |
| 1447277_s_at | Pcyox1                   | 2887  | 3359  | 4607  | 3303  | 4416.25 | 4409  | 4769  | 6997.3 | 5602  | 6162.02 | 3714.56 | 5587.9  | 1.50      | 8.934207489 |
| 1444089_at   | Spnb2                    | 60    | 90.9  | 89.38 | 71.93 | 71.42   | 113.3 | 80.97 | 120.97 | 123.8 | 138.04  | 76.726  | 115.42  | 1.50      | 6.981670997 |
| 1433887_at   | Dnajc3a                  | 604.2 | 693.2 | 757.4 | 565.5 | 533.82  | 1131  | 726.4 | 1161.3 | 880.6 | 838.95  | 630.816 | 947.74  | 1.50      | 8.035551262 |
| 1455072_at   | Cep350                   | 1296  | 2016  | 2086  | 1725  | 2382.63 | 2018  | 2531  | 3389.2 | 3147  | 3161.12 | 1900.92 | 2849.36 | 1.50      | 9.872171728 |
| 1415961_at   | Iitm2c                   | 2155  | 2630  | 2483  | 3065  | 2293.17 | 4598  | 4640  | 2918.3 | 3727  | 3041.72 | 2525.1  | 3784.88 | 1.50      | 8.934207489 |
| 1428608_at   | Mylc2b                   | 8227  | 11408 | 11697 | 9649  | 8111.03 | 14257 | 15527 | 14740  | 14188 | 14841.6 | 9818.54 | 14710.8 | 1.50      | 0           |
| 1451475_at   | Plxnd1                   | 209.7 | 229.6 | 229.7 | 368.6 | 208.28  | 433.4 | 318.8 | 373.48 | 333.6 | 406.64  | 249.178 | 373.172 | 1.50      | 8.035551262 |
| 1417813_at   | Ikbke                    | 154.9 | 201.8 | 211.8 | 201.7 | 106.39  | 278.3 | 220.3 | 237.01 | 284.6 | 291.7   | 175.332 | 262.382 | 1.50      | 5.986067289 |
| 1448210_at   | Rab1                     | 412.4 | 581.8 | 623.2 | 423.6 | 605.5   | 850.9 | 734.1 | 1031.2 | 722   | 616.91  | 529.312 | 791.032 | 1.49      | 9.872171728 |
| 1455435_s_at | Chdh                     | 1740  | 1993  | 2713  | 1722  | 1757.28 | 2553  | 2620  | 2728.1 | 3657  | 3240.22 | 1985.34 | 2959.55 | 1.49      | 6.981670997 |
| 1435230_at   | Ankrd12 /// Ankrd12-like | 245.9 | 351   | 358.1 | 234.9 | 262.97  | 468   | 478.8 | 447.3  | 337.1 | 431.98  | 290.564 | 432.654 | 1.49      | 5.118264635 |
| 1460316_at   | Acsl1                    | 169.3 | 112.7 | 123.8 | 135.3 | 152.26  | 184.7 | 179.4 | 198.64 | 254.6 | 214.46  | 138.662 | 206.372 | 1.49      | 4.305363781 |
| 1423394_at   | Pcyox1                   | 420.3 | 508.9 | 554.5 | 470.4 | 584.85  | 719   | 734   | 823.06 | 800.6 | 700.86  | 507.8   | 755.512 | 1.49      | 0           |
| 1422465_a_at | Nxn                      | 350.8 | 545.1 | 521.8 | 362   | 569.05  | 702.9 | 674.8 | 657.85 | 825.1 | 625.23  | 469.766 | 697.168 | 1.48      | 5.118264635 |
| 1448477_at   | Chst12                   | 347.5 | 566.3 | 660.4 | 663.3 | 654.54  | 639.1 | 765.3 | 907.16 | 978.2 | 1001.27 | 578.404 | 858.196 | 1.48      | 9.872171728 |
| 1439506_at   | Gm98                     | 64.31 | 72.08 | 70.38 | 83.78 | 87.58   | 86.76 | 97.78 | 140.45 | 99.74 | 135.79  | 75.626  | 112.104 | 1.48      | 9.872171728 |
| 1439060_s_at | Wipi1                    | 211.2 | 177.8 | 151   | 176.1 | 150.99  | 265.9 | 219.1 | 272.81 | 252.5 | 274.7   | 173.4   | 257.01  | 1.48      | 1.132990469 |
| 1422821_s_at | Stard5                   | 129.7 | 222.4 | 206.2 | 263.1 | 228.64  | 279.9 | 250.5 | 363.72 | 318.5 | 338.69  | 209.986 | 310.268 | 1.48      | 8.035551262 |
| 1437741_at   | Rab21                    | 742.2 | 987.9 | 1432  | 876.5 | 1027.15 | 1112  | 1640  | 1760.3 | 1530  | 1434.22 | 1013.1  | 1495.25 | 1.48      | 11.33922971 |
| 1428690_at   | Tysnd1                   | 118.3 | 138.8 | 166.6 | 199.3 | 162.24  | 182.6 | 215.1 | 256.11 | 243.8 | 261.35  | 157.052 | 231.79  | 1.48      | 5.876757684 |
| 1457676_at   | Tirap                    | 344.8 | 302.4 | 321.8 | 351.3 | 393.15  | 423.9 | 421   | 584    | 519.3 | 576.15  | 342.696 | 504.852 | 1.47      | 3.376755907 |
| 1437223_s_at | Xbp1                     | 3750  | 3183  | 3924  | 3397  | 3148.65 | 5686  | 4875  | 5687.8 | 4919  | 4435.08 | 3480.3  | 5120.63 | 1.47      | 1.132990469 |
| 1447223_at   | ---                      | 68.67 | 88.08 | 90.61 | 121.3 | 104.1   | 133.5 | 137   | 158.65 | 142.2 | 123.51  | 94.556  | 138.988 | 1.47      | 3.376755907 |
| 1423871_at   | Tmem63a                  | 505.5 | 629.8 | 573.2 | 669.6 | 600.02  | 678.8 | 760.1 | 1044.1 | 911.8 | 981.03  | 595.63  | 875.162 | 1.47      | 5.118264635 |
| 1456876_at   | P42pop                   | 64.44 | 66.16 | 66.94 | 87.8  | 88.82   | 82.54 | 100.6 | 117.18 | 116.5 | 132.21  | 74.832  | 109.802 | 1.47      | 6.981670997 |
| 1450626_at   | Manba                    | 353.6 | 749.6 | 738.4 | 700.1 | 762.32  | 990.4 | 1090  | 891.12 | 1009  | 857.45  | 660.8   | 967.604 | 1.46      | 6.981670997 |
| 1423967_at   | Palm                     | 511.5 | 635.4 | 530.3 | 662.4 | 542.87  | 832.2 | 726.3 | 800.71 | 845.9 | 1015.22 | 576.49  | 844.072 | 1.46      | 2.226912301 |
| 1425187_at   | Sel1l                    | 147.4 | 157.7 | 208.3 | 225.8 | 205.86  | 274.5 | 232.1 | 333.57 | 272.5 | 270.69  | 189.016 | 276.664 | 1.46      | 5.118264635 |
| 1417632_at   | Atp6v0a1                 | 244.4 | 226.6 | 202.2 | 324.5 | 200.41  | 301.1 | 399.1 | 308.79 | 317.5 | 423.64  | 239.62  | 350.002 | 1.46      | 8.934207489 |

Table S1. CMP to GMP transition gene signature in control mice.

**Genes up-regulated in GMPs compared to CMPs (= GMP gene signature)**

| Probe Set    | Gene Symbol             | CMPs  |       |       |       |         | GMPs  |       |        |       |         | Av Cont | Av Mut  | Fold Diff | q-value(%)  |
|--------------|-------------------------|-------|-------|-------|-------|---------|-------|-------|--------|-------|---------|---------|---------|-----------|-------------|
|              |                         | CMP3  | CMP4  | CMP6  | CMP8  | CMP10   | GMP3  | GMP4  | GMP6   | GMP8  | GMP10   |         |         |           |             |
| 1434698_at   | Mia3                    | 169.6 | 297.4 | 258.4 | 231.4 | 293.37  | 306.5 | 400.8 | 352.1  | 390.2 | 375.23  | 250.01  | 364.966 | 1.46      | 4.305363781 |
| 1434815_a_at | Mapkapk3                | 8380  | 12472 | 10461 | 10444 | 5685.88 | 14283 | 15499 | 14851  | 13304 | 11313.5 | 9488.81 | 13849.9 | 1.46      | 8.934207489 |
| 1436143_at   | 4933425L03Rik           | 534.2 | 496   | 388.1 | 406.6 | 432.07  | 591.9 | 542   | 797.79 | 684.2 | 677.55  | 451.41  | 658.664 | 1.46      | 4.305363781 |
| 1449476_at   | Rage                    | 77.02 | 88.47 | 109.3 | 118.6 | 89.75   | 131.2 | 125.8 | 174.02 | 135.6 | 136.03  | 96.634  | 140.528 | 1.45      | 5.118264635 |
| 1444197_at   | 5830482F20Rik           | 60    | 60    | 60    | 60    | 60      | 73.3  | 78.78 | 108.79 | 78.41 | 95.17   | 60      | 86.89   | 1.45      | 3.863788009 |
| 1428518_at   | Mif1ip                  | 657.3 | 770.1 | 628.6 | 953.7 | 644.05  | 923.8 | 1080  | 1098.1 | 990.1 | 1192.38 | 730.754 | 1056.89 | 1.45      | 3.376755907 |
| 1424654_at   | Acp2                    | 213.9 | 261.5 | 240.1 | 322.6 | 218.46  | 331.9 | 317.4 | 459.96 | 314   | 391.45  | 251.316 | 362.94  | 1.44      | 8.934207489 |
| 1427213_at   | Pfkfb1                  | 60    | 117.3 | 138.4 | 144   | 134.05  | 183.3 | 167.4 | 156.36 | 195.8 | 153.44  | 118.742 | 171.262 | 1.44      | 9.872171728 |
| 1424058_at   | Prrc1                   | 571   | 930.5 | 823.2 | 760.7 | 731.13  | 1121  | 895.7 | 1100.6 | 1267  | 1119.96 | 763.282 | 1100.88 | 1.44      | 4.305363781 |
| 1451382_at   | Chac1                   | 60    | 73.43 | 60.82 | 71.04 | 66.21   | 79    | 73.83 | 121.41 | 91.92 | 111.9   | 66.3    | 95.612  | 1.44      | 9.872171728 |
| 1424172_at   | Hagh                    | 488.5 | 513.1 | 500.3 | 376   | 459.85  | 651.7 | 613.5 | 711.9  | 725.5 | 661.77  | 467.55  | 672.86  | 1.44      | 0           |
| 1416385_a_at | M6pr                    | 2115  | 3138  | 3939  | 2439  | 3182.29 | 4477  | 4074  | 4481.7 | 4862  | 3400.5  | 2962.85 | 4258.98 | 1.44      | 8.934207489 |
| 1427323_s_at | Wipi1                   | 94.81 | 110.3 | 91.8  | 99.92 | 111.49  | 147.6 | 118.1 | 163.76 | 159.4 | 140.71  | 101.66  | 145.926 | 1.44      | 2.226912301 |
| 1435327_at   | AW112037 /// Lpgat1     | 248.4 | 408.7 | 530.3 | 396.2 | 396.36  | 585.5 | 489.6 | 662.23 | 591.8 | 510.35  | 395.984 | 567.9   | 1.43      | 8.934207489 |
| 1435402_at   | Gramd1b                 | 67.46 | 106.1 | 107.2 | 85.53 | 90.27   | 151.6 | 125.7 | 144.81 | 126.4 | 105.97  | 91.3    | 130.902 | 1.43      | 5.986067289 |
| 1428667_at   | Maoa                    | 340   | 437.9 | 565.4 | 505.4 | 525.92  | 501.1 | 679.2 | 681    | 729.5 | 802.7   | 474.91  | 678.702 | 1.43      | 8.934207489 |
| 1450919_at   | Mpp1                    | 548.5 | 587.9 | 584.7 | 631.7 | 638.75  | 869.2 | 704.9 | 906.7  | 913.3 | 873.48  | 598.308 | 853.504 | 1.43      | 0           |
| 1456393_at   | 2310002J21Rik           | 9535  | 13353 | 11471 | 5795  | 10687.4 | 14212 | 13409 | 15584  | 16132 | 13015.3 | 10168.5 | 14470.7 | 1.42      | 9.872171728 |
| 1428644_at   | Mgat5                   | 1192  | 1135  | 1062  | 1069  | 1089.86 | 1136  | 1687  | 1963.3 | 1632  | 1473.43 | 1109.62 | 1578.23 | 1.42      | 6.981670997 |
| 1417203_at   | Ethe1                   | 451.9 | 573.7 | 731.5 | 663.5 | 600.14  | 889.6 | 780.9 | 826.28 | 963.4 | 834.82  | 604.152 | 859.01  | 1.42      | 2.81898819  |
| 1432845_at   | ---                     | 76.44 | 88.98 | 78.7  | 84.85 | 96.62   | 102.4 | 102.3 | 160.4  | 121.4 | 118.38  | 85.118  | 120.966 | 1.42      | 8.934207489 |
| 1424655_at   | Acp2                    | 88.5  | 200   | 176.5 | 196.4 | 156.21  | 209.5 | 221   | 254.63 | 219.4 | 256.31  | 163.542 | 232.154 | 1.42      | 9.872171728 |
| 1434511_at   | Phkb                    | 283   | 386.5 | 373.8 | 339.5 | 289.04  | 477.9 | 435.6 | 621.15 | 406.1 | 429.58  | 334.364 | 474.056 | 1.42      | 8.934207489 |
| 1456170_x_at | Calr                    | 10113 | 15271 | 14866 | 14549 | 15022.6 | 20000 | 18527 | 20000  | 20000 | 20000   | 13964.1 | 19705.4 | 1.41      | 1.132990469 |
| 1436225_at   | Trpm2                   | 87.95 | 87.68 | 84.88 | 109.1 | 88.63   | 120.2 | 107.6 | 173.32 | 115.4 | 129.87  | 91.646  | 129.274 | 1.41      | 9.872171728 |
| 1450498_at   | Mthfr                   | 76.73 | 88.19 | 92.97 | 132.4 | 103.79  | 116.8 | 119.5 | 146.44 | 159.3 | 154.25  | 98.812  | 139.238 | 1.41      | 9.872171728 |
| 1416059_at   | LOC100048726 /// Sec23b | 1640  | 2631  | 3369  | 2444  | 2897.84 | 3478  | 4128  | 3735.7 | 3901  | 3016.74 | 2596.42 | 3652.02 | 1.41      | 9.872171728 |
| 1428508_at   | Tbc1d2b                 | 669.2 | 635.1 | 530.4 | 493.1 | 627.49  | 657.6 | 692.6 | 976.24 | 908.9 | 916.35  | 591.054 | 830.34  | 1.40      | 8.035551262 |
| 1448339_at   | Tmem30a                 | 353.6 | 380.3 | 382.5 | 415.3 | 349.05  | 493.9 | 553.4 | 589.36 | 514.5 | 490.97  | 376.146 | 528.41  | 1.40      | 0           |
| 1415987_at   | Hdlbp                   | 1813  | 2592  | 2453  | 2064  | 2267.37 | 3161  | 3354  | 2852.3 | 3355  | 2993.81 | 2237.89 | 3143.27 | 1.40      | 1.832069694 |
| 1432332_a_at | Nudt19                  | 279.1 | 400.9 | 453.8 | 354.2 | 390.11  | 586.7 | 572.7 | 492.25 | 549.7 | 431.92  | 375.62  | 526.65  | 1.40      | 5.876757684 |
| 1455590_at   | Nqo2                    | 234.4 | 286.2 | 365.4 | 247.5 | 292.63  | 429.8 | 398.6 | 408.57 | 333.1 | 428.82  | 285.228 | 399.758 | 1.40      | 4.305363781 |
| 1419513_a_at | Ect2                    | 700.2 | 541.4 | 841.5 | 585.1 | 758.07  | 938.6 | 899.4 | 1209.7 | 869.4 | 878.68  | 685.258 | 959.144 | 1.40      | 8.934207489 |
| 1428240_at   | Nrxn1                   | 116.5 | 114.2 | 139.7 | 128.8 | 153.75  | 184.7 | 174.2 | 193.47 | 187.3 | 173.51  | 130.582 | 182.638 | 1.40      | 0           |
| 1429524_at   | Myo1f                   | 512.7 | 410.4 | 456.7 | 653.2 | 532.67  | 606.9 | 599.5 | 892.26 | 739.7 | 744.48  | 513.124 | 716.552 | 1.40      | 11.33922971 |
| 1449702_at   | Zfand2a                 | 198.2 | 338.6 | 308.2 | 322.5 | 350.3   | 378.9 | 399.8 | 434.06 | 422   | 481.97  | 303.554 | 423.346 | 1.39      | 5.876757684 |
| 1453974_at   | 1700023A20Rik           | 87.96 | 86.9  | 68.35 | 88.11 | 90.98   | 114.6 | 130.6 | 100.35 | 109.1 | 134.23  | 84.46   | 117.788 | 1.39      | 2.918890699 |

Table S1. CMP to GMP transition gene signature in control mice.

**Genes up-regulated in GMPs compared to CMPs (= GMP gene signature)**

| Probe Set    | Gene Symbol                  | CMPs  |       |       |       |         | GMPs  |       |        |       |         | Av Cont | Av Mut  | Fold Diff | q-value(%)  |
|--------------|------------------------------|-------|-------|-------|-------|---------|-------|-------|--------|-------|---------|---------|---------|-----------|-------------|
|              |                              | CMP3  | CMP4  | CMP6  | CMP8  | CMP10   | GMP3  | GMP4  | GMP6   | GMP8  | GMP10   |         |         |           |             |
| 1436797_a_at | Surf4                        | 839.5 | 926   | 957.3 | 717   | 858.2   | 1372  | 1085  | 1122.9 | 1197  | 1208.72 | 859.614 | 1197.16 | 1.39      | 1.832069694 |
| 1434223_at   | 1810007P19Rik /// LOC10004   | 74.5  | 64.79 | 80.22 | 64.56 | 83.79   | 121.9 | 85.33 | 97.63  | 109.6 | 97.52   | 73.572  | 102.394 | 1.39      | 5.118264635 |
| 1424495_a_at | Cklf                         | 475.4 | 657.8 | 639.7 | 546   | 592.44  | 759   | 781.7 | 1071.2 | 775   | 664.72  | 582.258 | 810.322 | 1.39      | 11.33922971 |
| 1418392_a_at | Gbp3                         | 867.1 | 1069  | 1395  | 888.4 | 1019.87 | 1241  | 1507  | 1732   | 1396  | 1407.94 | 1047.88 | 1456.68 | 1.39      | 8.035551262 |
| 1452056_s_at | Ppp3ca                       | 719.2 | 575.6 | 559.2 | 543.3 | 629.08  | 737.8 | 745   | 1029   | 833.9 | 859.42  | 605.28  | 841.022 | 1.39      | 5.118264635 |
| 1444486_at   | Klhl5                        | 60    | 60    | 83.77 | 65.57 | 60      | 96.76 | 86.53 | 108.25 | 97.54 | 67.81   | 65.868  | 91.378  | 1.39      | 9.872171728 |
| 1436102_at   | Sec22c                       | 178.7 | 315.5 | 226.9 | 288.6 | 210.77  | 372.2 | 330.8 | 376.2  | 309.9 | 304.26  | 244.12  | 338.662 | 1.39      | 8.934207489 |
| 1459522_s_at | Gyg                          | 6707  | 8032  | 7436  | 8322  | 6793.76 | 11739 | 11447 | 8467.3 | 10660 | 9379.74 | 7458.16 | 10338.5 | 1.39      | 3.863788009 |
| 1423140_at   | Lipa                         | 106   | 104.2 | 121.1 | 116.9 | 90.61   | 180.1 | 121.3 | 155.4  | 152.3 | 137.51  | 107.754 | 149.316 | 1.39      | 5.876757684 |
| 1423333_at   | Ergic1                       | 351.7 | 420.6 | 416.5 | 431.9 | 401.29  | 441.6 | 484   | 593.44 | 581.7 | 692.13  | 404.37  | 558.562 | 1.38      | 8.035551262 |
| 1438188_x_at | Slc25a29                     | 81.59 | 83.38 | 87.78 | 83.3  | 74.69   | 139.1 | 106.6 | 100.41 | 126.8 | 93.89   | 82.148  | 113.352 | 1.38      | 5.986067289 |
| 1456036_x_at | Gsto1                        | 3656  | 4060  | 4138  | 4575  | 2956.23 | 4193  | 5574  | 6007.2 | 5135  | 5784.8  | 3877.04 | 5338.72 | 1.38      | 6.981670997 |
| 1454268_a_at | Cyba                         | 2683  | 3238  | 3900  | 3303  | 4243.16 | 4457  | 4710  | 5598.8 | 5147  | 3966.17 | 3473.58 | 4775.84 | 1.37      | 8.035551262 |
| 1418956_at   | Tssk6                        | 60    | 72.31 | 69.99 | 74.81 | 60.54   | 82.7  | 80.59 | 106.44 | 97.54 | 96.53   | 67.53   | 92.76   | 1.37      | 2.918890699 |
| 1415853_at   | Def8                         | 361.4 | 369.1 | 439   | 294.1 | 357.48  | 460.6 | 478.8 | 518.88 | 624.7 | 417.58  | 364.21  | 500.122 | 1.37      | 8.934207489 |
| 1452440_at   | LOC100048347 /// Tnfsf12 /// | 61.65 | 60.23 | 60    | 88.53 | 62.46   | 97.64 | 81.37 | 104.45 | 79.31 | 94.27   | 66.574  | 91.408  | 1.37      | 8.035551262 |
| 1428502_at   | Actr6                        | 620.6 | 585.8 | 641.1 | 621.1 | 724.75  | 796.5 | 898.6 | 1034.5 | 846.4 | 806.25  | 638.644 | 876.454 | 1.37      | 2.226912301 |
| 1436623_at   | Entpd7                       | 92.73 | 109.9 | 141.9 | 107.3 | 98.78   | 166.3 | 124.1 | 175.6  | 148.1 | 140.57  | 110.108 | 150.922 | 1.37      | 8.934207489 |
| 1421846_at   | Wsb2                         | 135.7 | 103.4 | 109.4 | 82.59 | 95.58   | 139.7 | 136.8 | 139.69 | 136.6 | 167.08  | 105.338 | 143.984 | 1.37      | 5.986067289 |
| 1448967_at   | Nipsnap3a                    | 651   | 697.3 | 998.9 | 746.5 | 866.48  | 1064  | 1105  | 1288.1 | 958.1 | 993.64  | 792.032 | 1081.78 | 1.37      | 6.981670997 |
| 1428385_at   | March8                       | 365   | 348.4 | 432.3 | 217.5 | 288.03  | 451.6 | 439   | 504.37 | 423.3 | 431.52  | 330.236 | 449.954 | 1.36      | 9.872171728 |
| 1451243_at   | Rnpep                        | 726.8 | 895.1 | 1016  | 760.3 | 862.48  | 1424  | 1147  | 1188.2 | 1014  | 1027.09 | 852.14  | 1160.25 | 1.36      | 6.981670997 |
| 1424708_at   | Tmed10                       | 1209  | 1189  | 1046  | 1201  | 1092.38 | 1415  | 1577  | 1685.7 | 1450  | 1663.08 | 1147.35 | 1558.19 | 1.36      | 0           |
| 1447226_at   | ---                          | 118.4 | 94.27 | 88.66 | 129.2 | 120.91  | 135.6 | 130.6 | 160.14 | 137.9 | 184.67  | 110.294 | 149.774 | 1.36      | 9.872171728 |
| 1453949_s_at | Lypla1                       | 105.5 | 171.8 | 183.9 | 203.8 | 160.59  | 247.5 | 222.6 | 233.39 | 189.7 | 225.68  | 165.126 | 223.772 | 1.36      | 9.872171728 |
| 1451307_at   | Mrpl14                       | 289.5 | 338.7 | 269.7 | 359.9 | 293.72  | 435   | 463.4 | 425.3  | 328.7 | 447.17  | 310.318 | 419.92  | 1.35      | 5.876757684 |
| 1418890_a_at | Rab3d                        | 605.3 | 509.8 | 432.2 | 453.8 | 444.18  | 695.1 | 634.4 | 634.71 | 669.5 | 668.91  | 489.068 | 660.508 | 1.35      | 1.832069694 |
| 1460194_at   | Phyh                         | 345.1 | 375.5 | 301.7 | 267.8 | 242.63  | 452.3 | 450.7 | 442.37 | 370.9 | 348.95  | 306.518 | 413.03  | 1.35      | 8.934207489 |
| 1418319_at   | Ufsp2                        | 658.5 | 790.5 | 1024  | 629.3 | 808.93  | 1025  | 921   | 1194.1 | 1060  | 1067.15 | 782.326 | 1053.51 | 1.35      | 8.035551262 |
| 1448378_at   | Fscn1                        | 89.89 | 102.6 | 94.09 | 132.1 | 122.52  | 119.2 | 128.7 | 165.87 | 161.4 | 152.99  | 108.25  | 145.628 | 1.35      | 9.872171728 |
| 1418621_at   | Rab2a                        | 2522  | 3061  | 3667  | 2494  | 3087.01 | 4013  | 4222  | 4048.9 | 4293  | 3354.65 | 2966.01 | 3986.27 | 1.34      | 5.876757684 |
| 1423252_at   | Hdgrfp3                      | 91.79 | 105.4 | 104.3 | 116.1 | 106.82  | 164   | 121.4 | 153.05 | 128.6 | 137.64  | 104.888 | 140.928 | 1.34      | 3.863788009 |
| 1420174_s_at | Tax1bp1                      | 286.5 | 375.2 | 376   | 417.2 | 443.28  | 524.3 | 506.4 | 590.08 | 435.6 | 493.21  | 379.644 | 509.914 | 1.34      | 5.986067289 |
| 1429012_at   | Arhgef6                      | 1576  | 2138  | 2133  | 2300  | 2063.44 | 2190  | 2638  | 3314.3 | 2849  | 2697.43 | 2042.05 | 2737.72 | 1.34      | 8.934207489 |
| 1417426_at   | Srgn                         | 12297 | 18575 | 14743 | 12100 | 13267.6 | 20000 | 20000 | 18560  | 19365 | 17065.5 | 14196.6 | 18998   | 1.34      | 5.876757684 |
| 1441281_s_at | Ninj1                        | 1104  | 1067  | 1076  | 1267  | 1254.38 | 1163  | 1536  | 1436.1 | 1786  | 1799.69 | 1153.92 | 1544.04 | 1.34      | 9.872171728 |
| 1450987_a_at | 2310004I24Rik                | 421.3 | 560.5 | 557.4 | 612.2 | 547.78  | 784.3 | 676   | 880.7  | 689.4 | 579.21  | 539.814 | 721.932 | 1.34      | 9.872171728 |

Table S1. CMP to GMP transition gene signature in control mice.

**Genes up-regulated in GMPs compared to CMPs (= GMP gene signature)**

| Probe Set    | Gene Symbol        | CMPs  |       |       |       |         | GMPs  |       |        |       |         | Av Cont | Av Mut  | Fold Diff | q-value(%)  |
|--------------|--------------------|-------|-------|-------|-------|---------|-------|-------|--------|-------|---------|---------|---------|-----------|-------------|
|              |                    | CMP3  | CMP4  | CMP6  | CMP8  | CMP10   | GMP3  | GMP4  | GMP6   | GMP8  | GMP10   |         |         |           |             |
| 1436301_at   | Ripk5              | 367.2 | 409.4 | 426.1 | 325.6 | 397.05  | 538   | 379.6 | 600.83 | 547.7 | 502.65  | 385.06  | 513.752 | 1.33      | 9.872171728 |
| 1418857_at   | Slc13a2            | 78.12 | 69.93 | 69.89 | 73.53 | 60.09   | 82.77 | 84.63 | 106.15 | 91.47 | 103.78  | 70.312  | 93.76   | 1.33      | 3.863788009 |
| 1458132_at   | ENSMUSG00000067124 | 67.74 | 94.49 | 65.18 | 88.16 | 90.31   | 84.18 | 122.1 | 111.39 | 107.9 | 115.47  | 81.176  | 108.21  | 1.33      | 9.872171728 |
| 1423358_at   | Ece2               | 812.2 | 1039  | 1121  | 811   | 1117.34 | 1251  | 1580  | 1184.1 | 1299  | 1203.95 | 980.214 | 1303.67 | 1.33      | 8.934207489 |
| 1428146_s_at | Acaa2              | 1570  | 1835  | 1779  | 1453  | 1599.8  | 1983  | 2162  | 2138.3 | 2531  | 2134.85 | 1647.38 | 2189.7  | 1.33      | 2.226912301 |
| 1456896_at   | 6720462K09Rik      | 87.89 | 84.65 | 69.93 | 91.1  | 87.53   | 116.8 | 90.34 | 140.46 | 104.8 | 107.08  | 84.22   | 111.906 | 1.33      | 9.872171728 |
| 1456251_x_at | Tspo               | 6924  | 5047  | 5219  | 5714  | 3700.77 | 7540  | 7074  | 7054.4 | 6916  | 6686.74 | 5321.07 | 7054.18 | 1.33      | 8.934207489 |
| 1417386_at   | Npepps             | 806.2 | 905.1 | 686.9 | 716   | 796.71  | 1085  | 853.5 | 1184.9 | 979.1 | 1074.98 | 782.162 | 1035.46 | 1.32      | 5.876757684 |
| 1434031_at   | Zfp692             | 619.5 | 582   | 556.1 | 437.1 | 587.81  | 605.6 | 633.3 | 808.64 | 758.5 | 873.78  | 556.514 | 735.962 | 1.32      | 11.33922971 |
| 1448318_at   | Adfp               | 3356  | 3425  | 3459  | 3081  | 2930.74 | 4619  | 4511  | 4545.5 | 4213  | 3528.65 | 3250.16 | 4283.5  | 1.32      | 2.81898819  |
| 1450792_at   | Tyrobp             | 6107  | 5771  | 6495  | 7283  | 6828.35 | 8042  | 9154  | 8577.5 | 8939  | 8078.4  | 6496.94 | 8558.26 | 1.32      | 1.132990469 |
| 1448583_at   | AA960436           | 555.7 | 450   | 466.1 | 469.2 | 530.51  | 629.6 | 567.9 | 615.68 | 679.2 | 759.67  | 494.298 | 650.394 | 1.32      | 3.863788009 |
| 1416465_a_at | Vapa               | 6853  | 5418  | 6354  | 6112  | 5388.96 | 6681  | 7287  | 8492.8 | 9098  | 8048.62 | 6025.14 | 7921.39 | 1.31      | 5.876757684 |
| 1427737_a_at | 1200011M11Rik      | 173.5 | 222.3 | 245.6 | 263.8 | 239.82  | 306.2 | 323.8 | 342.39 | 258.9 | 272.07  | 229.02  | 300.676 | 1.31      | 8.035551262 |
| 1452139_at   | Slc35c1            | 384.9 | 439.1 | 477.3 | 381.1 | 453.6   | 520.1 | 508.1 | 597.9  | 666.5 | 505.49  | 427.206 | 559.616 | 1.31      | 5.986067289 |
| 1439375_x_at | Aldoa /// Aldoart1 | 6140  | 7170  | 6373  | 5843  | 5886.29 | 8929  | 7499  | 7763.3 | 9229  | 7723.73 | 6282.42 | 8228.89 | 1.31      | 2.81898819  |
| 1427870_x_at | Igh-6              | 157   | 111.1 | 120.4 | 137.3 | 156.95  | 174.9 | 149.1 | 207.42 | 190.8 | 172.12  | 136.558 | 178.866 | 1.31      | 9.872171728 |
| 1449712_s_at | Atp6v1e1           | 2454  | 2433  | 2583  | 2450  | 2535.09 | 2701  | 2904  | 4157.4 | 3357  | 3125.17 | 2490.98 | 3249    | 1.30      | 11.33922971 |
| 1426434_at   | Tmem43             | 424.9 | 434.3 | 554.2 | 420.4 | 467.92  | 646.3 | 571.2 | 612.72 | 607.8 | 559.68  | 460.324 | 599.524 | 1.30      | 2.226912301 |
| 1444601_at   | ---                | 140.4 | 158.1 | 129.2 | 167.4 | 142.34  | 158.1 | 172.4 | 221.44 | 188.9 | 219.39  | 147.482 | 192.048 | 1.30      | 9.872171728 |
| 1451557_at   | Tat                | 61.69 | 60    | 60    | 64.99 | 72.79   | 80.17 | 70.63 | 77.6   | 95    | 92.53   | 63.894  | 83.186  | 1.30      | 5.876757684 |
| 1417781_at   | Lass4              | 122.2 | 120.5 | 125.6 | 149.8 | 144.19  | 151.4 | 165.3 | 199.93 | 174.3 | 171.25  | 132.446 | 172.414 | 1.30      | 4.305363781 |
| 1456867_x_at | Ergic3             | 3001  | 3138  | 2699  | 3493  | 3457.53 | 4196  | 4674  | 4433.9 | 3752  | 3432.58 | 3157.55 | 4097.72 | 1.30      | 6.981670997 |
| 1435089_at   | 2010111I01Rik      | 118.1 | 154.9 | 153.3 | 157.1 | 140.74  | 198.4 | 203.7 | 197.7  | 188.7 | 148.88  | 144.836 | 187.48  | 1.29      | 6.981670997 |
| 1416328_a_at | Atp6v0e            | 3931  | 4274  | 3666  | 4610  | 3530.56 | 4697  | 6107  | 5088.9 | 4622  | 5308.04 | 4002.35 | 5164.57 | 1.29      | 6.981670997 |
| 1420012_at   | Xbp1               | 61.4  | 71.62 | 78.79 | 79.39 | 65.36   | 106.6 | 81.22 | 104.09 | 78.91 | 89.07   | 71.312  | 91.976  | 1.29      | 9.872171728 |
| 1423833_a_at | Brp44              | 2106  | 3111  | 3419  | 3019  | 3115.7  | 3416  | 4182  | 3788.5 | 4208  | 3434.13 | 2954.14 | 3805.74 | 1.29      | 9.872171728 |
| 1418929_at   | Ift57              | 406.2 | 420.3 | 413.7 | 399.7 | 511.22  | 540.4 | 558.5 | 567.52 | 549.1 | 554.2   | 430.224 | 553.93  | 1.29      | 1.132990469 |
| 1449140_at   | Nudcd2             | 331.9 | 366.3 | 500.8 | 410.6 | 434.86  | 522.5 | 560.6 | 584.15 | 468.3 | 492.84  | 408.87  | 525.664 | 1.29      | 8.934207489 |
| 1448391_at   | Rab9               | 1304  | 1174  | 1261  | 919.3 | 1194.68 | 1573  | 1451  | 1735.6 | 1416  | 1338.55 | 1170.54 | 1503    | 1.28      | 6.981670997 |
| 1440520_a_at | 1700051A21Rik      | 75.79 | 70.52 | 80.42 | 101.2 | 99.7    | 100.1 | 108.3 | 123.31 | 108   | 108.85  | 85.524  | 109.702 | 1.28      | 8.035551262 |
| 1438640_x_at | Pgk1               | 12203 | 13839 | 14381 | 15105 | 13210.8 | 14287 | 16014 | 20000  | 18113 | 19693.9 | 13747.7 | 17621.6 | 1.28      | 8.934207489 |
| 1426697_a_at | Lrpap1             | 344.9 | 408.2 | 362.4 | 398.5 | 392.83  | 515.1 | 410.2 | 499.65 | 490.1 | 523.54  | 381.356 | 487.72  | 1.28      | 2.81898819  |
| 1445614_at   | ---                | 60    | 76.51 | 73.81 | 73.79 | 91.76   | 96.75 | 86.8  | 93.41  | 91.26 | 112.37  | 75.174  | 96.118  | 1.28      | 9.872171728 |
| 1415941_s_at | Zfand2a            | 188.2 | 163.1 | 181.8 | 187.1 | 203.82  | 252.2 | 197.6 | 243.99 | 225   | 262.04  | 184.772 | 236.154 | 1.28      | 5.118264635 |
| 1451624_a_at | Phospho2           | 124.8 | 160.2 | 178   | 133.5 | 162.43  | 182.8 | 173.7 | 216.12 | 218.3 | 178.37  | 151.782 | 193.868 | 1.28      | 9.872171728 |
| 1422467_at   | Ppt1               | 335.5 | 512.3 | 456.1 | 508.4 | 499.53  | 627.2 | 569.4 | 554.13 | 658.7 | 528.53  | 462.356 | 587.6   | 1.27      | 9.872171728 |

Table S1. CMP to GMP transition gene signature in control mice.

**Genes up-regulated in GMPs compared to CMPs (= GMP gene signature)**

| Probe Set    | Gene Symbol                | CMPs  |       |       |       |         | GMPs  |       |        |       |         | Av Cont | Av Mut  | Fold Diff | q-value(%)  |
|--------------|----------------------------|-------|-------|-------|-------|---------|-------|-------|--------|-------|---------|---------|---------|-----------|-------------|
|              |                            | CMP3  | CMP4  | CMP6  | CMP8  | CMP10   | GMP3  | GMP4  | GMP6   | GMP8  | GMP10   |         |         |           |             |
| 1456520_at   | Zfp652                     | 194.1 | 214.4 | 228.7 | 183.4 | 209.84  | 266.8 | 246.8 | 314.68 | 245.9 | 233.46  | 206.092 | 261.53  | 1.27      | 8.035551262 |
| 1426558_x_at | 0610010B08Rik /// LOC10003 | 338.4 | 260.5 | 344.1 | 331.5 | 269.41  | 389.7 | 387   | 422.48 | 344   | 415.78  | 308.796 | 391.794 | 1.27      | 5.986067289 |
| 1425950_at   | 1700019H03Rik              | 123.9 | 126.8 | 138.9 | 131.3 | 109.28  | 168.5 | 130.4 | 189.02 | 154.1 | 156.94  | 126.018 | 159.786 | 1.27      | 9.872171728 |
| 1437055_x_at | Mfsd1                      | 135.1 | 144   | 163.6 | 150.1 | 130.33  | 181.1 | 167.4 | 214.38 | 191.5 | 161.48  | 144.632 | 183.164 | 1.27      | 6.981670997 |
| 1449024_a_at | Hexa                       | 7266  | 11515 | 10986 | 9287  | 9351.09 | 12737 | 11401 | 12604  | 12977 | 11494.5 | 9680.88 | 12242.8 | 1.26      | 9.872171728 |
| 1418096_at   | Dok3                       | 383.3 | 349.6 | 349.4 | 421.8 | 347.7   | 460.1 | 429.2 | 421.11 | 550.4 | 477.36  | 370.348 | 467.642 | 1.26      | 5.986067289 |
| 1453318_at   | Tmem102                    | 85.53 | 88.8  | 89.22 | 105.1 | 107.66  | 123.9 | 112.5 | 145.04 | 113.5 | 106.55  | 95.268  | 120.276 | 1.26      | 9.872171728 |
| 1455714_at   | Vstm2l                     | 96.59 | 93.35 | 91.35 | 110   | 101.13  | 118.6 | 105.4 | 121.3  | 130.1 | 145.06  | 98.484  | 124.104 | 1.26      | 6.981670997 |
| 1440442_at   | Map2k7                     | 115.4 | 129.4 | 129.4 | 161.7 | 142.05  | 146   | 162.6 | 193.43 | 183.9 | 167.07  | 135.568 | 170.608 | 1.26      | 9.872171728 |
| 1422484_at   | Cyca                       | 5377  | 4877  | 6105  | 4557  | 4630.01 | 7275  | 6260  | 6623   | 5921  | 6051.55 | 5109.29 | 6426.03 | 1.26      | 6.981670997 |
| 1460695_a_at | 2010111I01Rik              | 538.6 | 733.6 | 612.1 | 710.5 | 767.06  | 727.2 | 911.9 | 877.28 | 870.5 | 828.74  | 672.34  | 843.142 | 1.25      | 8.934207489 |
| 1417606_a_at | Calr                       | 12535 | 17557 | 16264 | 16527 | 16877.3 | 20000 | 20000 | 20000  | 20000 | 20000   | 15952   | 20000   | 1.25      | 2.460207875 |
| 1436120_at   | Setdb2                     | 620.6 | 562.6 | 500.8 | 528   | 654.59  | 659.8 | 634.1 | 810.92 | 698.8 | 788.72  | 573.308 | 718.476 | 1.25      | 8.934207489 |
| 1452143_at   | Spnb2                      | 2832  | 3619  | 4113  | 3141  | 3950.77 | 4767  | 4244  | 4363.7 | 4706  | 3999.85 | 3531.06 | 4415.97 | 1.25      | 8.934207489 |
| 1448948_at   | Rag1ap1                    | 302   | 365.4 | 315.2 | 339.5 | 393.87  | 422.2 | 409.4 | 447.17 | 400.2 | 463.87  | 343.198 | 428.576 | 1.25      | 3.863788009 |
| 1452375_at   | Aldh4a1                    | 70.51 | 93.01 | 91.51 | 99.27 | 91.18   | 117.6 | 119.9 | 103.88 | 112   | 102.69  | 89.096  | 111.216 | 1.25      | 5.876757684 |
| 1417182_at   | Dnaja2                     | 373.4 | 380.9 | 424.1 | 318   | 437.11  | 495   | 465.8 | 546.18 | 428.7 | 476.55  | 386.718 | 482.44  | 1.25      | 8.035551262 |
| 1431893_a_at | Pdss1                      | 269.4 | 268.8 | 330.7 | 276   | 298.19  | 319   | 389.4 | 374.56 | 311.5 | 405.66  | 288.604 | 360.008 | 1.25      | 8.934207489 |
| 1419429_at   | Cntfr                      | 74.86 | 65.72 | 60.05 | 73.2  | 70.89   | 89.79 | 83.37 | 78.51  | 87.82 | 90.28   | 68.944  | 85.954  | 1.25      | 2.226912301 |
| 1422241_a_at | Ndufa1                     | 13460 | 15622 | 14500 | 14392 | 15111.9 | 18281 | 16949 | 20000  | 17078 | 18805.4 | 14617.3 | 18222.7 | 1.25      | 1.832069694 |
| 1448422_at   | Tmed4                      | 1351  | 1467  | 1284  | 1576  | 1423.12 | 1847  | 1794  | 1796.7 | 1860  | 1531.32 | 1420.14 | 1765.71 | 1.24      | 2.918890699 |
| 1416547_at   | Ndufb3                     | 2606  | 3122  | 2364  | 2816  | 2424.51 | 3470  | 3752  | 3122.6 | 3096  | 3080.7  | 2666.47 | 3304.37 | 1.24      | 8.035551262 |
| 1451031_at   | Sfrp4                      | 100.9 | 102.3 | 98.27 | 103.5 | 99.15   | 132.9 | 123.4 | 146.94 | 112.3 | 108.49  | 100.816 | 124.802 | 1.24      | 8.035551262 |
| 1416189_a_at | Sec61a1                    | 11540 | 11002 | 10625 | 12153 | 9355.41 | 12333 | 11955 | 14959  | 13304 | 15129.9 | 10935.1 | 13536.3 | 1.24      | 8.934207489 |
| 1429568_x_at | Ube2f                      | 894.4 | 677.2 | 744.6 | 787.9 | 783.27  | 943   | 918.2 | 1073.2 | 898.9 | 977.99  | 777.456 | 962.258 | 1.24      | 4.305363781 |
| 1438753_at   | ---                        | 84.43 | 76.83 | 77.21 | 71.24 | 83.98   | 91.87 | 87.01 | 106.6  | 103.7 | 95.89   | 78.738  | 97.004  | 1.23      | 3.863788009 |
| 1436452_x_at | LOC100042343 /// Tmed2     | 9786  | 13004 | 12445 | 10341 | 9703.7  | 12334 | 14178 | 14207  | 14149 | 13227.6 | 11055.7 | 13619.2 | 1.23      | 8.934207489 |
| 1456865_x_at | Rrs1                       | 6956  | 6745  | 6354  | 7197  | 6183.19 | 7369  | 7492  | 8305.8 | 9967  | 8013.72 | 6686.98 | 8229.46 | 1.23      | 9.872171728 |
| 1447399_at   | ---                        | 71.36 | 71.16 | 67.62 | 79.7  | 91.83   | 87.4  | 85.83 | 101.57 | 91.91 | 101.66  | 76.334  | 93.674  | 1.23      | 9.872171728 |
| 1416441_at   | Pgcp                       | 807.2 | 896.3 | 797.5 | 689.1 | 826.63  | 1081  | 1086  | 943.28 | 933.2 | 883     | 803.366 | 985.402 | 1.23      | 6.981670997 |
| 1454676_s_at | Ticam1                     | 181.6 | 247.3 | 210.5 | 222.6 | 249.18  | 280.1 | 265.1 | 300.82 | 239.3 | 275.65  | 222.234 | 272.186 | 1.22      | 9.872171728 |
| 1441175_at   | Arx                        | 65.45 | 76.36 | 80.14 | 85.84 | 76.07   | 80.85 | 87.04 | 99.07  | 100.9 | 101.73  | 76.772  | 93.908  | 1.22      | 8.934207489 |
| 1460204_at   | Tec                        | 720.3 | 682.6 | 632.2 | 669.3 | 791.17  | 919.9 | 799.7 | 818.48 | 834.8 | 896.86  | 699.118 | 853.952 | 1.22      | 2.918890699 |
| 1427503_at   | Al324046                   | 75.44 | 67.27 | 62.43 | 77.23 | 68.16   | 75.17 | 84.54 | 88.67  | 80.39 | 98.7    | 70.106  | 85.494  | 1.22      | 8.934207489 |
| 1424026_s_at | BC013529                   | 169.2 | 165.7 | 158.5 | 178.5 | 138.11  | 220.9 | 191.4 | 198.36 | 191.9 | 182.41  | 162.014 | 197.012 | 1.22      | 5.876757684 |
| 1452758_s_at | Eif4g2                     | 15646 | 13503 | 12811 | 12606 | 11954   | 15348 | 15667 | 16561  | 15906 | 17336.8 | 13303.8 | 16163.7 | 1.21      | 4.305363781 |
| 1449272_at   | Cadm3                      | 60    | 61.21 | 60    | 72.77 | 66.32   | 69.1  | 72.92 | 76.37  | 79.49 | 91.03   | 64.06   | 77.782  | 1.21      | 9.872171728 |



Table S1. CMP to GMP transition gene signature in control mice.

**Genes up-regulated in GMPs compared to CMPs (= GMP gene signature)**

| Probe Set    | Gene Symbol               | CMPs  |       |       |       |         | GMPs  |       |        |       |         | Av Cont | Av Mut  | Fold Diff | q-value(%)  |
|--------------|---------------------------|-------|-------|-------|-------|---------|-------|-------|--------|-------|---------|---------|---------|-----------|-------------|
|              |                           | CMP3  | CMP4  | CMP6  | CMP8  | CMP10   | GMP3  | GMP4  | GMP6   | GMP8  | GMP10   |         |         |           |             |
| 1449441_a_at | Wbp1                      | 660.4 | 649.8 | 612.7 | 642.3 | 737.94  | 673.7 | 772.8 | 919.88 | 828.2 | 810.27  | 660.64  | 800.964 | 1.21      | 9.872171728 |
| 1452753_at   | Foxk2                     | 280.8 | 288.3 | 256.3 | 292.9 | 274.71  | 371.5 | 333.3 | 345.76 | 281.7 | 353.16  | 278.594 | 337.088 | 1.21      | 5.986067289 |
| 1427965_at   | Ssbp1                     | 10619 | 10853 | 11032 | 10770 | 11169.9 | 11172 | 11859 | 14829  | 13509 | 14340   | 10888.7 | 13141.8 | 1.21      | 8.934207489 |
| 1416727_a_at | Cyb5                      | 2002  | 2356  | 1923  | 2463  | 2276.86 | 2480  | 3029  | 2635.2 | 2588  | 2563.32 | 2204.34 | 2659.18 | 1.21      | 8.934207489 |
| 1437278_a_at | Uba2                      | 5270  | 4826  | 4773  | 5354  | 4086.06 | 5187  | 6580  | 5790.4 | 5821  | 5699.93 | 4861.9  | 5815.58 | 1.20      | 11.33922971 |
| 1449593_at   | ---                       | 111.1 | 133.1 | 110.8 | 137.4 | 130.28  | 160.3 | 139.3 | 142.56 | 156.3 | 145.16  | 124.52  | 148.722 | 1.19      | 6.981670997 |
| 1436443_a_at | Kdelc1                    | 3876  | 3553  | 3106  | 3430  | 3058.24 | 3798  | 3974  | 4471.6 | 3942  | 4010.16 | 3404.59 | 4039.1  | 1.19      | 8.035551262 |
| 1454661_at   | Atp5g3                    | 14516 | 17667 | 16903 | 14773 | 18191.4 | 20000 | 19565 | 20000  | 19110 | 18177.7 | 16410.2 | 19370.7 | 1.18      | 5.986067289 |
| 1428075_at   | LOC100041273 /// LOC10004 | 4109  | 3369  | 3571  | 3581  | 3414.16 | 4089  | 4494  | 4312.7 | 3953  | 4394.13 | 3608.97 | 4248.55 | 1.18      | 5.118264635 |
| 1419644_at   | Cstf2                     | 205.8 | 216.3 | 208.4 | 214.7 | 188.55  | 281.4 | 235.2 | 220.2  | 239.4 | 237.42  | 206.73  | 242.72  | 1.17      | 8.934207489 |
| 1455968_x_at | LOC100042343 /// Tmed2    | 12809 | 15690 | 15392 | 14052 | 12364.8 | 15404 | 16245 | 17651  | 15724 | 17069.6 | 14061.7 | 16418.8 | 1.17      | 11.33922971 |
| 1448795_a_at | LOC100046166 /// Tbrg4    | 734.1 | 679.2 | 668   | 685.8 | 660.14  | 711   | 775.3 | 789.98 | 872.1 | 828.37  | 685.444 | 795.35  | 1.16      | 5.876757684 |
| 1426606_at   | Crtac1                    | 71.13 | 71.12 | 64.14 | 67.15 | 74.71   | 76.39 | 76.2  | 84.95  | 86.23 | 78.63   | 69.65   | 80.48   | 1.16      | 5.876757684 |
| 1426346_at   | Prepl                     | 75.84 | 83.75 | 74.05 | 74.13 | 70.68   | 91.21 | 85.01 | 85.52  | 78.41 | 89.31   | 75.69   | 85.892  | 1.13      | 8.934207489 |
| 1438794_x_at | EG625298 /// LOC100039924 | 17370 | 15717 | 14876 | 16873 | 17152.4 | 17300 | 19027 | 18617  | 17769 | 18776   | 16397.7 | 18298.1 | 1.12      | 8.035551262 |
| 1439270_x_at | LOC100045999 /// LOC64020 | 14734 | 15320 | 14598 | 14605 | 14909.2 | 15771 | 16476 | 16040  | 16224 | 16474.9 | 14833.3 | 16197.3 | 1.09      | 0           |

Table S1. CMP to GMP transition gene signature in control mice.

**Genes down-regulated in GMPs compared to CMPs (= CMPs gene signature)**

| Probe Set    | Gene Symbol       | CMPs   |        |        |        |        | GMPs   |        |        |        |        | Av Cont | Av Mut | Fold Diff | q-value(%)  |
|--------------|-------------------|--------|--------|--------|--------|--------|--------|--------|--------|--------|--------|---------|--------|-----------|-------------|
|              |                   | CMP3   | CMP4   | CMP6   | CMP8   | CMP10  | GMP3   | GMP4   | GMP6   | GMP8   | GMP10  |         |        |           |             |
| 1449757_x_at | Dntt              | 627.99 | 338.64 | 406.35 | 847.91 | 917.21 | 60     | 60     | 60     | 60     | 60     | 627.62  | 60     | 10.46     | 2.583218269 |
| 1428114_at   | Slc14a1           | 2145.6 | 2007.1 | 1090.4 | 671.68 | 1077.8 | 563.66 | 222.65 | 60     | 62.3   | 60     | 1398.52 | 193.72 | 7.22      | 5.876757684 |
| 1448640_at   | Slc14a1           | 1078.2 | 1099.2 | 607.72 | 277.16 | 587.76 | 228.48 | 104.17 | 60     | 60     | 60     | 730.01  | 102.53 | 7.12      | 5.876757684 |
| 1454630_at   | Samd14            | 1325.1 | 928.22 | 381.98 | 434.06 | 437.15 | 219.79 | 113.54 | 60     | 60     | 60     | 701.302 | 102.67 | 6.83      | 11.33922971 |
| 1442000_at   | Gm1964            | 2191.2 | 2125.9 | 966.65 | 687.18 | 1064.9 | 494.1  | 360.76 | 60     | 60     | 60     | 1407.16 | 206.97 | 6.80      | 6.981670997 |
| 1422817_at   | Gp5               | 1284.1 | 975.48 | 432.9  | 423.15 | 512.31 | 287.59 | 101.28 | 60     | 60     | 60     | 725.59  | 113.77 | 6.38      | 8.934207489 |
| 1448995_at   | Pf4               | 18559  | 15072  | 9858.7 | 11817  | 11546  | 7331.5 | 3419   | 453.17 | 215.78 | 169.41 | 13370.5 | 2317.8 | 5.77      | 2.583218269 |
| 1450545_a_at | Dntt              | 147.95 | 338.9  | 407.31 | 249.78 | 579.49 | 60     | 60     | 60     | 60     | 60     | 344.686 | 60     | 5.74      | 5.876757684 |
| 1421461_at   | Mpl               | 1012   | 697.79 | 532.25 | 681.3  | 1002.6 | 162.53 | 127.34 | 86.34  | 131.45 | 185    | 785.176 | 138.53 | 5.67      | 1.655909147 |
| 1451046_at   | Zfpm1             | 1784.2 | 1601   | 851.4  | 842.59 | 1303.7 | 458.01 | 393.56 | 60     | 116.12 | 130.49 | 1276.56 | 231.64 | 5.51      | 2.583218269 |
| 1440037_at   | Pbx1              | 1372.3 | 1249.9 | 368.78 | 1297.2 | 1025.1 | 218.66 | 196.03 | 145.25 | 154.74 | 270.75 | 1062.68 | 197.09 | 5.39      | 2.81898819  |
| 1417155_at   | Mycn              | 328.18 | 583.72 | 448.81 | 298.64 | 704.17 | 164.92 | 108.56 | 60     | 60     | 60     | 472.704 | 90.696 | 5.21      | 2.81898819  |
| 1418199_at   | Hemgn             | 1197.8 | 1176.7 | 863.49 | 833.65 | 1181.1 | 425.98 | 364.05 | 61.97  | 87.55  | 72.21  | 1050.53 | 202.35 | 5.19      | 0           |
| 1455900_x_at | Tgm2              | 544.15 | 350.82 | 186.39 | 320.36 | 143.42 | 60     | 60     | 60     | 60     | 60     | 309.028 | 60     | 5.15      | 8.035551262 |
| 1417235_at   | Ehd3              | 1001.3 | 1111.7 | 407.09 | 466.75 | 443.58 | 283.43 | 127.61 | 137.55 | 60     | 64.96  | 686.086 | 134.71 | 5.09      | 8.035551262 |
| 1450852_s_at | F2r               | 3621.8 | 2590.4 | 1237.7 | 1882.9 | 1648.3 | 1063.2 | 480.32 | 220.04 | 188.83 | 214.62 | 2196.21 | 433.4  | 5.07      | 5.876757684 |
| 1433428_x_at | Tgm2              | 383.04 | 350.21 | 197.32 | 335.76 | 177.17 | 60     | 60     | 60     | 60     | 60     | 288.7   | 60     | 4.81      | 2.583218269 |
| 1437308_s_at | F2r               | 16274  | 15397  | 12740  | 14415  | 15134  | 8162.4 | 4708.2 | 651.8  | 691.01 | 1622.8 | 14792   | 3167.2 | 4.67      | 0           |
| 1455257_at   | Itgb3             | 2573.4 | 1712.6 | 599.81 | 1326.3 | 1054   | 600.7  | 319.38 | 232.01 | 258.66 | 272.55 | 1453.22 | 336.66 | 4.32      | 9.872171728 |
| 1448748_at   | Plek              | 3085.7 | 3762.7 | 2379.7 | 2379.2 | 3005.5 | 1136.1 | 905.46 | 386.58 | 515.17 | 519.53 | 2922.57 | 692.56 | 4.22      | 0           |
| 1428209_at   | Bex4              | 760.5  | 629.53 | 453.87 | 350.23 | 408.12 | 252.69 | 125.44 | 66.98  | 101.39 | 94.1   | 520.45  | 128.12 | 4.06      | 2.81898819  |
| 1437277_x_at | Tgm2              | 341.14 | 335.79 | 143.34 | 242.79 | 126.75 | 60     | 60     | 60     | 60     | 60     | 237.962 | 60     | 3.97      | 5.876757684 |
| 1448471_a_at | Ctla2a            | 3957.1 | 1974.8 | 1040.2 | 1884.1 | 2587.1 | 1121.8 | 855.41 | 175.4  | 308.79 | 555.65 | 2288.67 | 603.42 | 3.79      | 9.872171728 |
| 1452352_at   | Ctla2b            | 1720.6 | 913.63 | 476.66 | 858.67 | 848.59 | 372.43 | 377.57 | 152.91 | 214.58 | 253.41 | 963.638 | 274.18 | 3.51      | 9.872171728 |
| 1457933_at   | Gm1964            | 366.45 | 245.44 | 151.74 | 153.4  | 220.39 | 86.24  | 60.03  | 60     | 60     | 60     | 227.484 | 65.254 | 3.49      | 5.118264635 |
| 1419538_at   | Flt3              | 2276.5 | 1964.5 | 2318.3 | 3822   | 3114.8 | 1148.9 | 1182.3 | 479.23 | 561.59 | 503.96 | 2699.24 | 775.19 | 3.48      | 2.583218269 |
| 1423213_at   | Plxnc1            | 1726   | 2028.4 | 1605.8 | 1088.5 | 1323.4 | 714.99 | 572.3  | 371.5  | 361.77 | 299.62 | 1554.42 | 464.04 | 3.35      | 1.655909147 |
| 1450992_a_at | Meis1             | 1131   | 1129   | 954.09 | 689.23 | 989.26 | 504.11 | 422.15 | 99.36  | 233.2  | 240.8  | 978.528 | 299.92 | 3.26      | 1.655909147 |
| 1428647_at   | Pbx1              | 3159.8 | 4136.2 | 1799.8 | 1769.1 | 2368.5 | 1141.9 | 1006.3 | 813.3  | 490.64 | 605.68 | 2646.69 | 811.56 | 3.26      | 5.876757684 |
| 1428867_at   | Exoc3l2           | 417.21 | 365.98 | 246.41 | 127.63 | 185.51 | 165.39 | 62.32  | 60     | 62.03  | 65.54  | 268.548 | 83.056 | 3.23      | 11.33922971 |
| 1416811_s_at | Ctla2a /// Ctla2b | 1958   | 1820.2 | 941.36 | 1052.6 | 1654.8 | 1060   | 725.15 | 60     | 224.02 | 230.69 | 1485.38 | 459.98 | 3.23      | 6.981670997 |
| 1457052_at   | Kcng1             | 397    | 241.36 | 238.21 | 336.98 | 367.95 | 179.91 | 131.33 | 60     | 66.93  | 68.82  | 316.3   | 101.4  | 3.12      | 2.583218269 |
| 1425742_a_at | Tsc22d1           | 2989.6 | 3056.3 | 1591.4 | 2072.9 | 2404.8 | 1244.9 | 1228   | 438.05 | 498.3  | 505.16 | 2422.97 | 782.89 | 3.09      | 2.583218269 |
| 1450644_at   | Zfp36l1           | 558.78 | 396.06 | 376.96 | 368.23 | 358.03 | 180.7  | 186.38 | 90.03  | 102.86 | 111.83 | 411.612 | 134.36 | 3.06      | 1.655909147 |
| 1424923_at   | Serpina3g         | 6916.9 | 4386.3 | 4632.4 | 4793.4 | 5275.9 | 2688.7 | 1730.6 | 1144.6 | 1336.6 | 1641.6 | 5200.96 | 1708.4 | 3.04      | 1.655909147 |
| 1426801_at   | Sept8             | 508.59 | 396.28 | 429.92 | 154.83 | 421.57 | 250.39 | 171.62 | 60     | 84.68  | 68.23  | 382.238 | 126.98 | 3.01      | 6.981670997 |
| 1436515_at   | Bach2             | 231.37 | 304.17 | 264.46 | 423.11 | 300.34 | 149.39 | 175.41 | 60     | 62.36  | 69.08  | 304.69  | 103.25 | 2.95      | 2.583218269 |

Table S1. CMP to GMP transition gene signature in control mice.

**Genes down-regulated in GMPs compared to CMPs (= CMPs gene signature)**

| Probe Set    | Gene Symbol     | CMPs   |        |        |        |        | GMPs   |        |        |        |        | Av Cont | Av Mut | Fold Diff | q-value(%)  |
|--------------|-----------------|--------|--------|--------|--------|--------|--------|--------|--------|--------|--------|---------|--------|-----------|-------------|
|              |                 | CMP3   | CMP4   | CMP6   | CMP8   | CMP10  | GMP3   | GMP4   | GMP6   | GMP8   | GMP10  |         |        |           |             |
| 1453841_at   | 2310050P20Rik   | 510.55 | 368.37 | 176.19 | 499.82 | 355.7  | 87.69  | 135.67 | 60     | 135.62 | 229.08 | 382.126 | 129.61 | 2.95      | 5.986067289 |
| 1451428_x_at | Egfl7           | 1237.9 | 1050.4 | 1282.1 | 1554.1 | 2055.7 | 637.5  | 630.8  | 286.58 | 389.14 | 496.9  | 1436.04 | 488.18 | 2.94      | 2.583218269 |
| 1451506_at   | Mef2c           | 1460.2 | 968.22 | 834.52 | 841.17 | 1305.3 | 421.06 | 379.25 | 369.25 | 362.86 | 345.38 | 1081.87 | 375.56 | 2.88      | 2.583218269 |
| 1416333_at   | Dok2            | 633.65 | 383.34 | 337.51 | 284.54 | 242.65 | 154.3  | 128.09 | 145.96 | 117.81 | 108.22 | 376.338 | 130.88 | 2.88      | 8.035551262 |
| 1421498_a_at | 2010204K13Rik   | 942.52 | 665.9  | 432.11 | 839.64 | 496.88 | 325.85 | 231.54 | 177.77 | 187.72 | 267.17 | 675.41  | 238.01 | 2.84      | 3.863788009 |
| 1449198_a_at | St3gal5         | 436.3  | 218.38 | 286.94 | 295.03 | 317.2  | 128.73 | 123.12 | 120.53 | 89.45  | 103.41 | 310.77  | 113.05 | 2.75      | 2.583218269 |
| 1428284_at   | 8430427H17Rik   | 850.21 | 507.74 | 369.77 | 518.18 | 432.82 | 344.41 | 174.67 | 119.14 | 160.68 | 193.42 | 535.744 | 198.46 | 2.70      | 6.981670997 |
| 1447584_s_at | Myct1           | 279.17 | 164.07 | 190.12 | 202.41 | 190.98 | 110.35 | 92.85  | 60     | 60     | 61.06  | 205.35  | 76.852 | 2.67      | 2.002494782 |
| 1417872_at   | Fhl1            | 264.64 | 179.23 | 144.58 | 122.09 | 114.56 | 70.34  | 60     | 60     | 60     | 60     | 165.02  | 62.068 | 2.66      | 5.986067289 |
| 1460651_at   | Lat             | 685.45 | 703.27 | 345.06 | 423.85 | 363.86 | 369.13 | 228.81 | 107.54 | 121.65 | 131.54 | 504.298 | 191.73 | 2.63      | 8.934207489 |
| 1418294_at   | Epb4.1l4b       | 342.51 | 567.98 | 523.51 | 470.57 | 754.76 | 236.48 | 339.33 | 95.22  | 188.97 | 153.27 | 531.866 | 202.65 | 2.62      | 4.305363781 |
| 1433645_at   | Slc44a1         | 408.09 | 277.63 | 194.93 | 265.31 | 218.19 | 138.79 | 117.17 | 85.18  | 102.71 | 79.31  | 272.83  | 104.63 | 2.61      | 3.863788009 |
| 1418773_at   | Fads3           | 217.21 | 160.74 | 144.6  | 157.5  | 187.63 | 78.07  | 77.25  | 60     | 60     | 60     | 173.536 | 67.064 | 2.59      | 0           |
| 1424852_at   | Mef2c           | 4256   | 5658.5 | 4329.7 | 3459   | 5660.1 | 1838.1 | 1864.9 | 1729.6 | 1812.4 | 1784   | 4672.66 | 1805.8 | 2.59      | 1.655909147 |
| 1428650_at   | Tns1            | 455.86 | 643.77 | 448.28 | 643.23 | 888.03 | 323.39 | 286.55 | 106.42 | 243.94 | 230.95 | 615.834 | 238.25 | 2.58      | 3.863788009 |
| 1440285_at   | Ppp1r9a         | 819.38 | 422.33 | 303.44 | 491.19 | 403.99 | 115.26 | 238.44 | 249.12 | 175.34 | 168.78 | 488.066 | 189.39 | 2.58      | 9.872171728 |
| 1451507_at   | Mef2c           | 123.47 | 254.79 | 228.17 | 237.98 | 266.32 | 123.78 | 107.06 | 60     | 79.74  | 65.06  | 222.146 | 87.128 | 2.55      | 2.81898819  |
| 1454971_x_at | Tsc22d1         | 8484.7 | 8045.7 | 5477.1 | 8323.2 | 7767.3 | 3285.5 | 4093   | 1961   | 2569.3 | 3055.3 | 7619.58 | 2992.8 | 2.55      | 0           |
| 1437667_a_at | Bach2           | 234.76 | 255.25 | 184.96 | 278.81 | 201.62 | 151.42 | 122.94 | 60     | 60     | 60     | 231.08  | 90.872 | 2.54      | 2.583218269 |
| 1448765_at   | Fyn             | 882.78 | 510.5  | 456.02 | 352.93 | 587.14 | 373.16 | 252.19 | 87.13  | 184.72 | 204.96 | 557.874 | 220.43 | 2.53      | 9.872171728 |
| 1456634_at   | 9830001H06Rik   | 260.9  | 253.75 | 208.75 | 185.75 | 117.1  | 139.32 | 85.36  | 60     | 60     | 64.43  | 205.25  | 81.822 | 2.51      | 5.118264635 |
| 1420649_at   | Zfhx3           | 562.96 | 316.93 | 198.33 | 418.46 | 262.28 | 151.88 | 121.08 | 150.55 | 124.31 | 154.66 | 351.792 | 140.5  | 2.50      | 9.872171728 |
| 1428572_at   | Basp1 /// LOC10 | 1014.6 | 484.83 | 958.82 | 805.38 | 831.04 | 377.7  | 434.15 | 227.12 | 233.86 | 368    | 818.942 | 328.17 | 2.50      | 2.81898819  |
| 1419137_at   | Shank3          | 240.2  | 163.49 | 146.03 | 108.86 | 119.51 | 72.74  | 60     | 60     | 60     | 60     | 155.618 | 62.548 | 2.49      | 5.876757684 |
| 1439449_at   | Satb1           | 443.97 | 213.7  | 245.38 | 362.23 | 291.44 | 96.4   | 133.94 | 73.55  | 159.32 | 163.78 | 311.344 | 125.4  | 2.48      | 5.118264635 |
| 1450905_at   | Plxnc1          | 1826.3 | 1759.9 | 1021.2 | 1346.7 | 1134.4 | 548.81 | 591.24 | 783.14 | 367.38 | 589.7  | 1417.69 | 576.05 | 2.46      | 2.81898819  |
| 1418012_at   | Sh3glb1         | 368.59 | 510.15 | 349.63 | 416.23 | 316.04 | 271.08 | 193.61 | 71.6   | 136.16 | 132.95 | 392.128 | 161.08 | 2.43      | 2.81898819  |
| 1456072_at   | Ppp1r9a         | 644.04 | 369.73 | 241.44 | 366.14 | 322.06 | 116.03 | 181.17 | 212.69 | 152.68 | 137.89 | 388.682 | 160.09 | 2.43      | 9.872171728 |
| 1425503_at   | Gcnt2           | 409.95 | 532.76 | 464.94 | 678.45 | 731.77 | 330.28 | 401.59 | 123.31 | 194.55 | 135.83 | 563.574 | 237.11 | 2.38      | 5.876757684 |
| 1451427_a_at | Egfl7           | 751.09 | 693.74 | 800.99 | 1033.6 | 1198.4 | 465.41 | 464.95 | 347.92 | 321.38 | 298.09 | 895.568 | 379.55 | 2.36      | 2.583218269 |
| 1418123_at   | Unc119          | 1059.4 | 986.96 | 537.14 | 589.59 | 545.27 | 445.41 | 435.04 | 278.66 | 251.73 | 179.84 | 743.676 | 318.14 | 2.34      | 8.934207489 |
| 1417065_at   | Egr1            | 261.13 | 266.37 | 305.72 | 198.06 | 245.74 | 187.62 | 126.52 | 80.16  | 73.32  | 79.16  | 255.404 | 109.36 | 2.34      | 2.583218269 |
| 1424588_at   | Srgap3          | 336.91 | 399.08 | 229.22 | 332.88 | 240.39 | 242.93 | 114.59 | 99.53  | 104.14 | 97.78  | 307.696 | 131.79 | 2.33      | 5.118264635 |
| 1417558_at   | Fyn             | 1256.7 | 1144.8 | 777.61 | 1057.5 | 1254   | 629.68 | 620.2  | 256.74 | 352.77 | 494.17 | 1098.11 | 470.71 | 2.33      | 2.583218269 |
| 1417236_at   | Ehd3            | 385.25 | 310.5  | 139.22 | 315.54 | 247.88 | 90.46  | 128.96 | 188.92 | 102.29 | 95     | 279.678 | 121.13 | 2.31      | 8.035551262 |
| 1425268_a_at | Pear1           | 435.73 | 288.03 | 209.9  | 295.35 | 217.32 | 166.96 | 126.33 | 78.51  | 106.57 | 149.09 | 289.266 | 125.49 | 2.31      | 5.986067289 |
| 1429089_s_at | 2900026A02Rik   | 1224.7 | 714.42 | 472.46 | 1068.6 | 673.51 | 274.39 | 467.48 | 301.5  | 281.66 | 488.93 | 830.732 | 362.79 | 2.29      | 11.33922971 |

Table S1. CMP to GMP transition gene signature in control mice.

**Genes down-regulated in GMPs compared to CMPs (= CMPs gene signature)**

| Probe Set    | Gene Symbol   | CMPs   |        |        |        |        | GMPs   |        |        |        |        | Av Cont | Av Mut | Fold Diff | q-value(%)  |
|--------------|---------------|--------|--------|--------|--------|--------|--------|--------|--------|--------|--------|---------|--------|-----------|-------------|
|              |               | CMP3   | CMP4   | CMP6   | CMP8   | CMP10  | GMP3   | GMP4   | GMP6   | GMP8   | GMP10  |         |        |           |             |
| 1449389_at   | Tal1          | 2959.5 | 2236.4 | 1425.4 | 2133.9 | 2176.3 | 1103.6 | 1203.8 | 601.21 | 872.06 | 1044.6 | 2186.28 | 965.04 | 2.27      | 2.918890699 |
| 1418181_at   | Ptp4a3        | 1611.4 | 2019   | 1963.8 | 1736.7 | 2489.3 | 1277.3 | 1108.1 | 578.75 | 836.41 | 616.98 | 1964.03 | 883.52 | 2.22      | 2.583218269 |
| 1428577_at   | Ppfia4        | 243.2  | 211.7  | 234.03 | 193.95 | 267.87 | 143.75 | 115.19 | 66.69  | 109.63 | 89.07  | 230.15  | 104.87 | 2.19      | 1.655909147 |
| 1417219_s_at | Tmsb10        | 133.96 | 161.03 | 122.97 | 210.07 | 101.21 | 81.2   | 74.14  | 60     | 60     | 60     | 145.848 | 67.068 | 2.17      | 5.118264635 |
| 1418401_a_at | Dusp16        | 216.36 | 148.13 | 166.87 | 113.84 | 141.83 | 99.02  | 83.35  | 60     | 60     | 60     | 157.406 | 72.474 | 2.17      | 3.376755907 |
| 1460239_at   | Tspan13       | 1004.5 | 699.44 | 641.74 | 859.79 | 828.25 | 625.4  | 471.85 | 194.24 | 297.89 | 272.09 | 806.748 | 372.29 | 2.17      | 3.863788009 |
| 1434384_at   | Nrip1         | 862.55 | 848.92 | 744.85 | 580.68 | 889.16 | 465.31 | 541.92 | 216.22 | 308.23 | 281.17 | 785.232 | 362.57 | 2.17      | 2.583218269 |
| 1433695_at   | Cnrip1        | 209.54 | 120.15 | 186.47 | 128.91 | 188.78 | 92.03  | 84.57  | 69.58  | 74.71  | 65.61  | 166.77  | 77.3   | 2.16      | 2.81898819  |
| 1428340_s_at | Atp13a2       | 3771.6 | 2537.6 | 2888.2 | 2866.4 | 3196.6 | 1815.8 | 1689.2 | 1123   | 1232.1 | 1232   | 3052.06 | 1418.4 | 2.15      | 1.655909147 |
| 1446484_at   | ---           | 431.69 | 375.66 | 227.81 | 507.53 | 514.47 | 150.76 | 145.38 | 154.45 | 240.59 | 275.84 | 411.432 | 193.4  | 2.13      | 6.981670997 |
| 1418741_at   | Itgb7         | 1046.4 | 777.41 | 969.62 | 1070   | 1124.3 | 676.66 | 668.22 | 257.75 | 358.48 | 388.15 | 997.538 | 469.85 | 2.12      | 2.583218269 |
| 1434472_at   | Dusp3         | 617.41 | 412.77 | 254.58 | 506.57 | 340.97 | 187.08 | 167.83 | 232.93 | 192.09 | 228.74 | 426.46  | 201.73 | 2.11      | 8.035551262 |
| 1438125_at   | C230085N15Rik | 146.67 | 169.79 | 171.03 | 310.49 | 262.81 | 125.22 | 87.33  | 66.64  | 134.8  | 88.53  | 212.158 | 100.5  | 2.11      | 9.872171728 |
| 1455349_at   | LOC100048397  | 2168.5 | 2457.2 | 1597.5 | 1430.3 | 1421.9 | 1051.2 | 863.52 | 897.25 | 847.2  | 653.77 | 1815.08 | 862.58 | 2.10      | 3.863788009 |
| 1443394_at   | ---           | 220.88 | 102.5  | 104.71 | 153.84 | 126.12 | 60     | 60     | 60     | 68.94  | 92.54  | 141.61  | 68.296 | 2.07      | 11.33922971 |
| 1443832_s_at | Sdpr          | 202.48 | 199.88 | 106.34 | 146.44 | 132.57 | 60     | 60     | 115.24 | 69.32  | 75.67  | 157.542 | 76.046 | 2.07      | 5.986067289 |
| 1418011_a_at | Sh3glb1       | 266.08 | 315.68 | 190.06 | 318.74 | 232.59 | 190.15 | 136.97 | 96.94  | 88.62  | 126.94 | 264.63  | 127.92 | 2.07      | 3.376755907 |
| 1419406_a_at | Bcl11a        | 3116   | 2021.9 | 1266   | 2478.2 | 2053   | 1071.2 | 1291.4 | 984.73 | 859.96 | 1087   | 2187    | 1058.8 | 2.07      | 6.981670997 |
| 1458370_at   | Bmp2k         | 513.01 | 630.55 | 437.4  | 453.53 | 409.42 | 414.65 | 290.13 | 111.71 | 238.98 | 139.03 | 488.782 | 238.9  | 2.05      | 6.981670997 |
| 1416257_at   | Capn2         | 472.61 | 277.76 | 327.31 | 321.98 | 359.18 | 284.55 | 218.84 | 69.45  | 182.42 | 104.6  | 351.768 | 171.97 | 2.05      | 8.035551262 |
| 1428510_at   | Lphn1         | 418.31 | 458.67 | 330.31 | 655.57 | 585.63 | 255.21 | 186.01 | 239.13 | 199.27 | 317.59 | 489.698 | 239.44 | 2.05      | 5.876757684 |
| 1445338_at   | ---           | 200.82 | 144.5  | 120.4  | 108.4  | 136.97 | 75.2   | 80.77  | 60     | 60     | 72.71  | 142.218 | 69.736 | 2.04      | 3.863788009 |
| 1455161_at   | AI504432      | 2678.1 | 1659.9 | 1312.7 | 1784.8 | 1774.9 | 1056.9 | 1061.1 | 648    | 812.96 | 957.3  | 1842.08 | 907.25 | 2.03      | 5.876757684 |
| 1424704_at   | Runx2         | 2326.6 | 2833.8 | 3081.1 | 3102.4 | 3453.7 | 1705.3 | 2338.8 | 1039.4 | 1159.6 | 1066   | 2959.52 | 1461.8 | 2.02      | 2.81898819  |
| 1429196_at   | Rabgap1l      | 3056.5 | 2307.6 | 1565.2 | 2490.4 | 1679.3 | 1058.4 | 904.4  | 1207.4 | 1033.4 | 1303.3 | 2219.82 | 1101.4 | 2.02      | 5.876757684 |
| 1438242_at   | Usp40         | 252.28 | 211.92 | 145.02 | 141.18 | 159.25 | 106.63 | 86.98  | 69.16  | 116.43 | 79.06  | 181.93  | 91.652 | 1.99      | 5.876757684 |
| 1455773_at   | ---           | 177.2  | 266.08 | 247.24 | 129.93 | 191.24 | 102.72 | 128.81 | 70.75  | 133.46 | 80.29  | 202.338 | 103.21 | 1.96      | 6.981670997 |
| 1416724_x_at | Tcf4          | 1776.5 | 1147.7 | 703.98 | 1479.4 | 1161.5 | 559.01 | 735.99 | 492.34 | 661.12 | 763.39 | 1253.82 | 642.37 | 1.95      | 9.872171728 |
| 1428468_at   | 3110043O21Rik | 143.11 | 145.05 | 161.72 | 71.65  | 139.58 | 83.77  | 76.07  | 60     | 60     | 60     | 132.222 | 67.968 | 1.95      | 5.876757684 |
| 1434036_at   | Mtss1         | 294.71 | 333.42 | 256.55 | 214.95 | 242.8  | 194.26 | 204.66 | 104.24 | 109.38 | 82.22  | 268.486 | 138.95 | 1.93      | 5.876757684 |
| 1436499_at   | Sgms1         | 551.45 | 420.74 | 440.34 | 258.42 | 392.25 | 268.24 | 290.67 | 156.87 | 219.41 | 135.72 | 412.64  | 214.18 | 1.93      | 8.035551262 |
| 1416872_at   | Tspan6        | 196.32 | 271.25 | 257.75 | 199.5  | 290.8  | 187.1  | 122.21 | 79.95  | 127.67 | 116.59 | 243.124 | 126.7  | 1.92      | 3.376755907 |
| 1453395_at   | 5330403D14Rik | 169.97 | 158.16 | 128.03 | 132.71 | 154.14 | 95.18  | 76.61  | 60     | 78.42  | 77.06  | 148.602 | 77.454 | 1.92      | 0           |
| 1435195_at   | Vash1         | 484.56 | 510.21 | 343.6  | 497.08 | 406.82 | 273.06 | 203.43 | 232.81 | 186.15 | 275.03 | 448.454 | 234.1  | 1.92      | 2.002494782 |
| 1451608_a_at | Tspan33       | 176.53 | 172.34 | 136.26 | 107.61 | 92.41  | 84.21  | 84.27  | 71.82  | 60     | 60     | 137.03  | 72.06  | 1.90      | 6.981670997 |
| 1441971_at   | ---           | 395.06 | 342.17 | 199.58 | 291.55 | 212.99 | 177.93 | 210.73 | 112.15 | 115.73 | 145.15 | 288.27  | 152.34 | 1.89      | 9.872171728 |
| 1450675_at   | Smap2         | 1139.7 | 961.89 | 987.84 | 704.65 | 884.22 | 674.51 | 633.71 | 449.36 | 368.93 | 354.3  | 935.66  | 496.16 | 1.89      | 3.376755907 |

Table S1. CMP to GMP transition gene signature in control mice.

**Genes down-regulated in GMPs compared to CMPs (= CMPs gene signature)**

| Probe Set    | Gene Symbol      | CMPs   |        |        |        |        | GMPs   |        |        |        |        | Av Cont | Av Mut | Fold Diff | q-value(%)  |
|--------------|------------------|--------|--------|--------|--------|--------|--------|--------|--------|--------|--------|---------|--------|-----------|-------------|
|              |                  | CMP3   | CMP4   | CMP6   | CMP8   | CMP10  | GMP3   | GMP4   | GMP6   | GMP8   | GMP10  |         |        |           |             |
| 1437421_at   | ---              | 174.02 | 194.4  | 204.37 | 117.78 | 171.24 | 144.06 | 104.69 | 60     | 89.12  | 60     | 172.362 | 91.574 | 1.88      | 6.981670997 |
| 1456686_at   | ---              | 263.39 | 173.61 | 154.89 | 254.63 | 217.19 | 97.3   | 126.74 | 102.07 | 87.07  | 155.65 | 212.742 | 113.77 | 1.87      | 5.118264635 |
| 1416326_at   | Crip1            | 6444.9 | 6347.8 | 5437.6 | 7602.8 | 3780.6 | 3283   | 4744   | 2653.2 | 2623.7 | 2539.4 | 5922.74 | 3168.7 | 1.87      | 6.981670997 |
| 1442655_at   | Dnmt3b           | 194.06 | 231.13 | 227.58 | 280.58 | 160.27 | 159.81 | 132.8  | 60     | 110.94 | 122.41 | 218.724 | 117.19 | 1.87      | 5.876757684 |
| 1424089_a_at | Tcf4             | 536.79 | 436.25 | 280.62 | 554.52 | 405.49 | 274.91 | 330.75 | 90.71  | 221.39 | 268.68 | 442.734 | 237.29 | 1.87      | 11.33922971 |
| 1457072_at   | Bcl11a           | 185.41 | 222.34 | 260.85 | 283.13 | 285.25 | 173.53 | 140.43 | 120.63 | 110.88 | 122.51 | 247.396 | 133.6  | 1.85      | 2.583218269 |
| 1418643_at   | Tspan13          | 4183.2 | 2922.5 | 2100.9 | 3446.7 | 2903.7 | 1667.2 | 2581   | 1192.5 | 1207.1 | 1763.9 | 3111.37 | 1682.3 | 1.85      | 8.934207489 |
| 1419031_at   | Fads2            | 383.14 | 429.93 | 377.44 | 365.52 | 502.03 | 333.71 | 360.86 | 92.97  | 185.38 | 141.18 | 411.612 | 222.82 | 1.85      | 11.33922971 |
| 1452231_x_at | Ifi203           | 5763.4 | 6223.6 | 4588.5 | 6037.1 | 4925.8 | 3319.7 | 4190.2 | 2328.3 | 2368   | 2709.1 | 5507.66 | 2983.1 | 1.85      | 2.583218269 |
| 1443682_at   | AI662476         | 169.55 | 97.9   | 85.62  | 115.85 | 112.22 | 60     | 60     | 62.21  | 60     | 72.72  | 116.228 | 62.986 | 1.85      | 6.981670997 |
| 1433883_at   | Tpm4             | 2218.5 | 2463.8 | 2814.4 | 2589.1 | 3073   | 1495.1 | 2266.9 | 978.37 | 1243.4 | 1155.2 | 2631.73 | 1427.8 | 1.84      | 3.376755907 |
| 1429159_at   | Itih5            | 496.38 | 548.24 | 501.37 | 628.32 | 663.26 | 434.53 | 378.57 | 300.51 | 202.26 | 226.68 | 567.514 | 308.51 | 1.84      | 2.918890699 |
| 1435745_at   | 5031439G07Rik    | 1263.7 | 1129.1 | 1131.2 | 2079.3 | 1422.5 | 924.19 | 717.43 | 643.31 | 845.56 | 693.97 | 1405.14 | 764.89 | 1.84      | 8.035551262 |
| 1423702_at   | H1f0             | 925.14 | 1782.8 | 1670.3 | 1424.7 | 1389.4 | 1099.7 | 1015   | 380.71 | 894.59 | 543.38 | 1438.47 | 786.68 | 1.83      | 11.33922971 |
| 1416457_at   | Ddah2            | 487.95 | 568.49 | 374.57 | 428.84 | 421.95 | 383.59 | 374.24 | 128.44 | 188.67 | 175.59 | 456.36  | 250.11 | 1.82      | 9.872171728 |
| 1430127_a_at | Ccnd2            | 2637.3 | 2692.4 | 2087.7 | 2042   | 2575   | 1749.4 | 1868   | 636.32 | 1224.4 | 1133.5 | 2406.86 | 1322.3 | 1.82      | 5.118264635 |
| 1416008_at   | Satb1            | 1940.9 | 1489.5 | 2314.3 | 2369.7 | 2559.7 | 1472.1 | 1405.8 | 809.03 | 1123.6 | 1074.7 | 2134.79 | 1177.1 | 1.81      | 3.863788009 |
| 1442700_at   | Pde4b            | 478.28 | 412.41 | 398.33 | 500.14 | 310.38 | 212.03 | 214.59 | 250.13 | 205.94 | 276.26 | 419.908 | 231.79 | 1.81      | 2.583218269 |
| 1416167_at   | Prdx4            | 1095.5 | 2081.7 | 1728.3 | 1709.4 | 1980.8 | 1072.7 | 1312.6 | 689.49 | 990.34 | 685.74 | 1719.13 | 950.17 | 1.81      | 6.981670997 |
| 1422474_at   | Pde4b            | 195.87 | 205.57 | 240.95 | 218.54 | 284.05 | 167.94 | 151.39 | 83.23  | 130.82 | 107.33 | 228.996 | 128.14 | 1.79      | 2.918890699 |
| 1427819_at   | ---              | 463.87 | 345.25 | 229.74 | 330.22 | 278.49 | 193.58 | 135.71 | 175.7  | 159.76 | 262.02 | 329.514 | 185.35 | 1.78      | 11.33922971 |
| 1424554_at   | Ppp1r8           | 899.52 | 908.57 | 744.9  | 629.22 | 839.59 | 673.2  | 633.57 | 453.44 | 300.48 | 202.76 | 804.36  | 452.69 | 1.78      | 9.872171728 |
| 1433939_at   | Aff3             | 3695.9 | 3448.5 | 3744.8 | 3997.2 | 3782.4 | 3091.1 | 2661.9 | 1130.3 | 1533.5 | 2146.3 | 3733.76 | 2112.6 | 1.77      | 3.376755907 |
| 1433546_at   | Gns              | 423.35 | 414.78 | 423.35 | 335.42 | 424.56 | 347.95 | 347.95 | 113.68 | 190.11 | 148.05 | 404.292 | 229.55 | 1.76      | 9.872171728 |
| 1423597_at   | Atp8a1           | 289.79 | 215.8  | 328.6  | 186.73 | 263.95 | 152.92 | 105.18 | 132.23 | 189.08 | 151.9  | 256.974 | 146.26 | 1.76      | 5.986067289 |
| 1426633_s_at | Kctd14           | 957.35 | 618.53 | 511.66 | 842.87 | 642.62 | 369.72 | 354.76 | 447.97 | 316.34 | 551.59 | 714.606 | 408.08 | 1.75      | 8.934207489 |
| 1448960_at   | Cxxc5            | 1650.9 | 1152   | 1145.3 | 1720.1 | 1882.9 | 1109.8 | 892.03 | 589.72 | 891.37 | 833.95 | 1510.22 | 863.38 | 1.75      | 6.981670997 |
| 1455135_at   | 2610014I16Rik    | 644.36 | 944.29 | 560.81 | 718.52 | 848.84 | 436.53 | 435.68 | 426.75 | 355.92 | 473.63 | 743.364 | 425.7  | 1.75      | 3.376755907 |
| 1422938_at   | Bcl2 /// LOC1000 | 451.65 | 268.61 | 357.22 | 409.92 | 310.29 | 185.79 | 177.84 | 224.88 | 216.04 | 226.75 | 359.538 | 206.26 | 1.74      | 3.376755907 |
| 1420905_at   | Il17ra           | 1589.3 | 1780.8 | 1727.4 | 1404.7 | 1975   | 1522.5 | 1084.9 | 631.46 | 849    | 798.14 | 1695.41 | 977.19 | 1.73      | 5.876757684 |
| 1429097_at   | C030044C12Rik    | 84.69  | 122.09 | 149.15 | 152.65 | 137    | 79.19  | 78.5   | 66.95  | 69.74  | 78.41  | 129.116 | 74.558 | 1.73      | 3.863788009 |
| 1415698_at   | Golm1            | 1430.4 | 1141.1 | 918.03 | 1223.8 | 1122   | 1029.6 | 750.01 | 426.33 | 619.54 | 544.84 | 1167.08 | 674.06 | 1.73      | 6.981670997 |
| 1427185_at   | Mef2a            | 392.58 | 505.55 | 564.64 | 506.74 | 555.01 | 461.01 | 355.41 | 199.28 | 264.48 | 184.67 | 504.904 | 292.97 | 1.72      | 8.035551262 |
| 1423393_at   | Clic4            | 2776.8 | 3276   | 2149.4 | 2426.3 | 2992   | 1645.6 | 1852.6 | 1008.4 | 1685.1 | 1758.5 | 2724.1  | 1590   | 1.71      | 3.376755907 |
| 1460555_at   | 6330500D04Rik    | 1527.3 | 1645.1 | 1669.1 | 1081.8 | 1579.7 | 1110.4 | 1018.3 | 596.16 | 839.87 | 824.12 | 1500.62 | 877.77 | 1.71      | 3.376755907 |
| 1448325_at   | Myd116           | 304.15 | 279.74 | 247.45 | 240.68 | 167.21 | 185.37 | 180.5  | 110.16 | 137.96 | 110.92 | 247.846 | 144.98 | 1.71      | 6.981670997 |
| 1447164_at   | ---              | 307.5  | 247.33 | 172.68 | 217.41 | 157.01 | 129.68 | 123.93 | 102.3  | 142.55 | 146.49 | 220.386 | 128.99 | 1.71      | 9.872171728 |

Table S1. CMP to GMP transition gene signature in control mice.

**Genes down-regulated in GMPs compared to CMPs (= CMPs gene signature)**

| Probe Set    | Gene Symbol     | CMPs   |        |        |        |        | GMPs   |        |        |        |        | Av Cont | Av Mut | Fold Diff | q-value(%)  |
|--------------|-----------------|--------|--------|--------|--------|--------|--------|--------|--------|--------|--------|---------|--------|-----------|-------------|
|              |                 | CMP3   | CMP4   | CMP6   | CMP8   | CMP10  | GMP3   | GMP4   | GMP6   | GMP8   | GMP10  |         |        |           |             |
| 1426906_at   | Ifi203          | 4186   | 4151.2 | 3789.4 | 4990.3 | 3681.1 | 2655.5 | 4075.5 | 1800.7 | 1649.6 | 1996   | 4159.59 | 2435.4 | 1.71      | 8.035551262 |
| 1423754_at   | Ifitm3          | 6386.7 | 6595.2 | 4697.7 | 5722.1 | 4508.2 | 4656.9 | 4139.7 | 2177.5 | 2530.5 | 2860.8 | 5581.97 | 3273.1 | 1.71      | 6.981670997 |
| 1425267_a_at | Pear1           | 375.13 | 264.33 | 227.15 | 316.39 | 260.77 | 176.49 | 175.78 | 159.92 | 172.14 | 164.1  | 288.754 | 169.69 | 1.70      | 3.376755907 |
| 1451143_at   | 1110006G06Rik   | 912    | 729.52 | 631.38 | 845.02 | 816.37 | 630.38 | 563.84 | 379.33 | 389.49 | 365.93 | 786.858 | 465.79 | 1.69      | 3.863788009 |
| 1419649_s_at | Myo1c           | 1293.5 | 894.8  | 816.57 | 1424   | 1013.6 | 695.87 | 632.95 | 584.95 | 675.89 | 655.5  | 1088.51 | 649.03 | 1.68      | 6.981670997 |
| 1437341_x_at | Cnp             | 7933.6 | 7993.6 | 6283   | 10113  | 6189.2 | 6816.4 | 5233.6 | 3191.5 | 3936.3 | 3825.5 | 7702.5  | 4600.6 | 1.67      | 11.33922971 |
| 1418634_at   | Notch1          | 2443.2 | 3074.7 | 3111.5 | 3236.5 | 4223   | 2270.8 | 1830.8 | 1735.4 | 2066.5 | 1738.4 | 3217.77 | 1928.4 | 1.67      | 4.305363781 |
| 1442310_at   | Pip4k2a         | 186.75 | 143.48 | 151.52 | 157.49 | 170.13 | 86.57  | 86.86  | 93.52  | 102.98 | 117.21 | 161.874 | 97.428 | 1.66      | 1.655909147 |
| 1421963_a_at | Cdc25b          | 627.94 | 774.45 | 689.02 | 578.69 | 712.14 | 593.89 | 572.71 | 344.79 | 281.98 | 253.72 | 676.448 | 409.42 | 1.65      | 9.872171728 |
| 1423680_at   | Fads1           | 923.02 | 721.24 | 640.87 | 632.24 | 690.91 | 635.22 | 529.71 | 342.65 | 356.37 | 328.34 | 721.656 | 438.46 | 1.65      | 8.035551262 |
| 1451352_s_at | Mta3            | 897.26 | 780.64 | 1022.9 | 954.37 | 1169.7 | 731.91 | 777.39 | 346.96 | 533.92 | 551.86 | 964.98  | 588.41 | 1.64      | 5.986067289 |
| 1448229_s_at | Ccnd2           | 4127.1 | 2940.4 | 2667.9 | 3502.6 | 3897.1 | 1291.2 | 1730.6 | 1993.3 | 2530.5 | 2919.1 | 3427.01 | 2093   | 1.64      | 9.872171728 |
| 1416123_at   | Ccnd2           | 415.72 | 354.73 | 373.41 | 319.24 | 514.64 | 207.28 | 201.45 | 238.4  | 276.39 | 288.48 | 395.548 | 242.4  | 1.63      | 5.118264635 |
| 1448452_at   | Irf8            | 4199.4 | 3656.4 | 3712.2 | 6008.8 | 5044.9 | 2629.9 | 2602.7 | 2688.4 | 3003.3 | 2959   | 4524.31 | 2776.7 | 1.63      | 5.986067289 |
| 1443156_at   | ---             | 191.06 | 177.46 | 127.43 | 153.15 | 149.72 | 85.22  | 80.92  | 70.86  | 143.57 | 110.52 | 159.764 | 98.218 | 1.63      | 8.035551262 |
| 1418582_at   | Cbfa2t3         | 1001.9 | 861.15 | 557.93 | 818.09 | 950.63 | 662.95 | 499.67 | 493.75 | 360.83 | 559.85 | 837.934 | 515.41 | 1.63      | 8.035551262 |
| 1426297_at   | Tcfe2a          | 1167.7 | 1109.3 | 1670.6 | 1050.1 | 1333.9 | 1010.1 | 900.91 | 524.03 | 855.08 | 604.81 | 1266.32 | 778.99 | 1.63      | 8.934207489 |
| 1439323_a_at | Map4k1          | 1132.8 | 1007.8 | 821.02 | 814.91 | 804.78 | 719.71 | 636.58 | 568.21 | 418.95 | 481.53 | 916.27  | 565    | 1.62      | 5.118264635 |
| 1425506_at   | Mylk            | 220.57 | 346.67 | 221.18 | 271.83 | 265.14 | 216.56 | 154.58 | 152.3  | 151.81 | 144.04 | 265.078 | 163.86 | 1.62      | 5.986067289 |
| 1446088_at   | 9430081I23Rik   | 179.02 | 158.19 | 105.31 | 133.35 | 133.58 | 110.73 | 87.62  | 60     | 79.12  | 101.18 | 141.89  | 87.73  | 1.62      | 8.035551262 |
| 1438606_a_at | Clic4           | 1512.1 | 1697.4 | 2119.9 | 1464.4 | 2015.7 | 1194.4 | 1149.8 | 995.74 | 1038.2 | 1079.7 | 1761.9  | 1091.6 | 1.61      | 2.583218269 |
| 1416683_at   | Plxnb2          | 545.39 | 422.99 | 535.75 | 669.08 | 785.85 | 373.89 | 430.71 | 312.87 | 355.21 | 364.45 | 591.812 | 367.43 | 1.61      | 8.035551262 |
| 1418010_a_at | Sh3glb1         | 2156.8 | 2199.8 | 2162.8 | 1675.1 | 2031   | 1803.1 | 1590.7 | 1009.2 | 947.65 | 1012.2 | 2045.1  | 1272.6 | 1.61      | 5.986067289 |
| 1440400_at   | Rnf157          | 111.95 | 137.62 | 129.36 | 152.82 | 160.97 | 120.44 | 73.47  | 60     | 87.17  | 90.34  | 138.544 | 86.284 | 1.61      | 5.876757684 |
| 1434400_at   | Tgif2           | 712.18 | 550.63 | 428.74 | 644.16 | 592.51 | 449.37 | 415.27 | 253.14 | 320.83 | 387.65 | 585.644 | 365.25 | 1.60      | 6.981670997 |
| 1434603_at   | Med13l          | 1507.9 | 1849.4 | 1263.4 | 1665.4 | 1370   | 1042   | 1063.7 | 626.24 | 1003.3 | 1072.7 | 1531.24 | 961.6  | 1.59      | 4.305363781 |
| 1418942_at   | Ift74           | 197.01 | 176.63 | 177.01 | 208.1  | 136.39 | 168.46 | 127.86 | 96.7   | 96.14  | 73.17  | 179.028 | 112.47 | 1.59      | 9.872171728 |
| 1448926_at   | Hoxa5           | 174.64 | 168.4  | 124.31 | 157.65 | 151.89 | 132.23 | 115.1  | 66.19  | 106.53 | 70.62  | 155.378 | 98.134 | 1.58      | 6.981670997 |
| 1428096_at   | Ipo11           | 919.68 | 927.62 | 999.12 | 683.96 | 1041.9 | 653.35 | 650.2  | 456.48 | 627.3  | 504.87 | 914.462 | 578.44 | 1.58      | 3.376755907 |
| 1449404_at   | Pip4k2a         | 2146.6 | 1873.2 | 1731   | 2522.3 | 2059.1 | 1293   | 1300.3 | 1453.8 | 1095.8 | 1403.6 | 2066.44 | 1309.3 | 1.58      | 2.583218269 |
| 1458126_at   | D030041H20Rik   | 170.35 | 104.42 | 108.04 | 120.69 | 124.19 | 90.18  | 70.97  | 60     | 72.63  | 104.57 | 125.538 | 79.67  | 1.58      | 11.33922971 |
| 1423212_at   | Phc1            | 841.62 | 743.8  | 642.55 | 811.49 | 860.39 | 661.16 | 486.72 | 470.33 | 363.51 | 503.87 | 779.97  | 497.12 | 1.57      | 3.376755907 |
| 1448775_at   | Ifi203          | 2722.3 | 2728.7 | 2913.9 | 3947.9 | 3465   | 2011.7 | 2472.3 | 1757.2 | 1550   | 2267.6 | 3155.54 | 2011.8 | 1.57      | 5.876757684 |
| 1436836_x_at | Cnn3 /// LOC100 | 5287.8 | 4899.3 | 7564.8 | 8115.8 | 7859   | 4057.6 | 4061.4 | 4679.2 | 4318.7 | 4413.2 | 6745.34 | 4306   | 1.57      | 8.035551262 |
| 1440227_at   | Slc5a3          | 200.22 | 225.96 | 183.72 | 195.35 | 162.19 | 89.44  | 120.12 | 116.53 | 138.31 | 153.2  | 193.488 | 123.52 | 1.57      | 2.918890699 |
| 1417548_at   | Sart3           | 159.25 | 133.45 | 171.48 | 125.39 | 89.4   | 89.25  | 80.69  | 73.79  | 103.71 | 88.19  | 135.794 | 87.126 | 1.56      | 11.33922971 |
| 1448027_at   | Ncoa3           | 818.77 | 537.42 | 490.59 | 656.59 | 643.62 | 500.45 | 367.21 | 368.39 | 380.6  | 402.75 | 629.398 | 403.88 | 1.56      | 6.981670997 |

Table S1. CMP to GMP transition gene signature in control mice.

**Genes down-regulated in GMPs compared to CMPs (= CMPs gene signature)**

| Probe Set    | Gene Symbol   | CMPs   |        |        |        |        | GMPs   |        |        |        |        | Av Cont | Av Mut | Fold Diff | q-value(%)  |
|--------------|---------------|--------|--------|--------|--------|--------|--------|--------|--------|--------|--------|---------|--------|-----------|-------------|
|              |               | CMP3   | CMP4   | CMP6   | CMP8   | CMP10  | GMP3   | GMP4   | GMP6   | GMP8   | GMP10  |         |        |           |             |
| 1435484_at   | Slc5a3        | 647.27 | 509.66 | 441.77 | 535.54 | 386.32 | 371.36 | 322.86 | 371.5  | 257.97 | 301.82 | 504.112 | 325.1  | 1.55      | 6.981670997 |
| 1417240_at   | Zyx           | 2543.6 | 3054.6 | 2327.6 | 2486.1 | 3028.9 | 2316.5 | 2296.8 | 1014.7 | 1589.5 | 1453.7 | 2688.14 | 1734.2 | 1.55      | 9.872171728 |
| 1452746_at   | Atp13a2       | 2486.6 | 2552.2 | 3191.1 | 3232   | 3522.4 | 2181.5 | 1872.9 | 1712.9 | 1800.7 | 2115.5 | 2996.86 | 1936.7 | 1.55      | 2.81898819  |
| 1420824_at   | Sema4d        | 700.68 | 999.71 | 813.91 | 1197.6 | 1112.5 | 571.19 | 687.27 | 599.98 | 670.47 | 589.09 | 964.872 | 623.6  | 1.55      | 6.981670997 |
| 1445665_at   | ---           | 140.61 | 111.01 | 108.13 | 118.17 | 123.4  | 86.08  | 95.11  | 60     | 71.03  | 78.76  | 120.264 | 78.196 | 1.54      | 2.583218269 |
| 1449089_at   | Nrip1         | 1079.9 | 865.93 | 593.45 | 815.27 | 933.29 | 569.75 | 575.45 | 456.55 | 573.68 | 613.49 | 857.568 | 557.78 | 1.54      | 8.035551262 |
| 1450052_at   | Kif2a         | 374.96 | 301.07 | 426.99 | 297.97 | 263.14 | 266.37 | 204.35 | 214.63 | 190.69 | 210.57 | 332.826 | 217.32 | 1.53      | 8.035551262 |
| 1441131_at   | ---           | 160.5  | 147.83 | 158.57 | 112.69 | 134.81 | 106.55 | 81.34  | 79.76  | 100.91 | 98.12  | 142.88  | 93.336 | 1.53      | 2.81898819  |
| 1434359_at   | 6330500D04Rik | 235.87 | 255.82 | 243.27 | 233.5  | 245.78 | 194.45 | 198.58 | 151.9  | 157.77 | 91.1   | 242.848 | 158.76 | 1.53      | 4.305363781 |
| 1417039_a_at | Cul7          | 1086.1 | 873.41 | 990.92 | 1393.6 | 1222.8 | 991.48 | 727.69 | 555.42 | 717.21 | 661.81 | 1113.36 | 730.72 | 1.52      | 9.872171728 |
| 1455495_at   | Abl2          | 1471.8 | 1351.7 | 1048   | 1897.9 | 1424.1 | 858.14 | 1088.6 | 859.31 | 915.77 | 1004.2 | 1438.69 | 945.19 | 1.52      | 8.934207489 |
| 1450897_at   | Arhgap5       | 253.67 | 181.6  | 253.6  | 281.18 | 208.8  | 146.06 | 153.84 | 156.27 | 178.38 | 139.94 | 235.77  | 154.9  | 1.52      | 4.305363781 |
| 1416723_at   | Tcf4          | 637.13 | 936.27 | 783.39 | 867.62 | 928.04 | 597.89 | 654.93 | 390.6  | 575.9  | 520.83 | 830.49  | 548.03 | 1.52      | 5.876757684 |
| 1417622_at   | Slc12a2       | 302.87 | 403.19 | 388.41 | 368.39 | 338.2  | 177.12 | 246.43 | 256.29 | 258.06 | 251.53 | 360.212 | 237.89 | 1.51      | 2.583218269 |
| 1452843_at   | Il6st         | 1653.2 | 1145.3 | 1208.5 | 1053.3 | 1176.5 | 1076.2 | 869.91 | 622.46 | 879.91 | 674.72 | 1247.36 | 824.63 | 1.51      | 11.33922971 |
| 1448390_a_at | Dhrs3         | 717.96 | 643.18 | 956.61 | 818.75 | 706.96 | 529.59 | 561.29 | 601.51 | 366.37 | 487.48 | 768.692 | 509.25 | 1.51      | 5.986067289 |
| 1448956_at   | Stard10       | 1564.3 | 1094.7 | 1090.1 | 948.12 | 1260.1 | 652.48 | 819.92 | 792.8  | 921.01 | 761.06 | 1191.45 | 789.45 | 1.51      | 8.035551262 |
| 1416940_at   | Ppif          | 1135.6 | 1801.9 | 1717.1 | 1315   | 1692.2 | 1135.5 | 997.12 | 958.28 | 972.19 | 1025.9 | 1532.34 | 1017.8 | 1.51      | 5.876757684 |
| 1427691_a_at | Ifnar2        | 802.31 | 1107.4 | 1281.7 | 1057.4 | 1296.3 | 660.34 | 799.63 | 601.49 | 876.31 | 754.54 | 1109.01 | 738.46 | 1.50      | 6.981670997 |
| 1428479_at   | Nfatc1        | 828.82 | 547.68 | 674.55 | 678.18 | 881.58 | 625.57 | 517.3  | 435.68 | 392.62 | 440.61 | 722.162 | 482.36 | 1.50      | 9.872171728 |
| 1429085_at   | Vezf1         | 3386.1 | 2565.4 | 2063.9 | 2433.4 | 2835   | 1856.3 | 1870.6 | 1387.4 | 1799.9 | 2061.1 | 2656.78 | 1795.1 | 1.48      | 8.035551262 |
| 1455741_a_at | Ece1          | 351.7  | 346.61 | 482.05 | 521.92 | 405.77 | 304.94 | 330.6  | 264.91 | 249.19 | 275.41 | 421.61  | 285.01 | 1.48      | 6.981670997 |
| 1417892_a_at | Sirt3         | 3061.3 | 2361.5 | 1984.4 | 1977.8 | 2388.6 | 1820.9 | 1868.1 | 1157.2 | 1672.4 | 1459   | 2354.7  | 1595.5 | 1.48      | 11.33922971 |
| 1417676_a_at | Ptpro         | 184.89 | 180.73 | 248.24 | 252.62 | 246.73 | 169.98 | 160.2  | 168.97 | 159.81 | 101.14 | 222.642 | 152.02 | 1.46      | 8.934207489 |
| 1440841_at   | ---           | 231.86 | 255.98 | 246.27 | 226.04 | 218.71 | 172.07 | 144.1  | 98.02  | 173    | 217.85 | 235.772 | 161.01 | 1.46      | 6.981670997 |
| 1435970_at   | Nlk           | 984.57 | 891.05 | 740.91 | 752.74 | 644.34 | 525.08 | 510.75 | 685.46 | 481.04 | 546.11 | 802.722 | 549.69 | 1.46      | 6.981670997 |
| 1423206_s_at | 2310003F16Rik | 3051   | 2624.2 | 2702.8 | 3025.4 | 2248.1 | 1831.7 | 2631.2 | 1313.3 | 1805.1 | 1808.1 | 2730.3  | 1877.9 | 1.45      | 9.872171728 |
| 1422580_at   | Myl4          | 82.67  | 110.58 | 92.94  | 120.69 | 94.31  | 88.98  | 67.84  | 60     | 67.92  | 60     | 100.238 | 68.948 | 1.45      | 6.981670997 |
| 1460576_at   | Exoc6         | 2343   | 1892.9 | 1570.1 | 2372.4 | 1626.9 | 1134.5 | 1299.8 | 1506.6 | 1401.1 | 1408.1 | 1961.07 | 1350   | 1.45      | 8.934207489 |
| 1426662_at   | Cmas          | 2599.9 | 3352.9 | 2636.9 | 2661.4 | 2943.2 | 1967.2 | 2529.5 | 1495.7 | 2092.3 | 1690.3 | 2838.86 | 1955   | 1.45      | 5.876757684 |
| 1433711_s_at | Sesn1         | 2369.2 | 3057.2 | 3251.4 | 3437.1 | 3532.3 | 2426.7 | 2393.7 | 2103.2 | 1931.8 | 1957.9 | 3129.43 | 2162.7 | 1.45      | 4.305363781 |
| 1454967_at   | ---           | 396.09 | 429.94 | 289.86 | 339.25 | 332.51 | 276.76 | 274.72 | 210.39 | 243.7  | 229.86 | 357.53  | 247.09 | 1.45      | 5.876757684 |
| 1453360_a_at | Tex9          | 153.72 | 153.48 | 197.96 | 131.49 | 183.72 | 144.74 | 113.2  | 91.19  | 126.91 | 91.01  | 164.074 | 113.41 | 1.45      | 11.33922971 |
| 1452745_at   | Trappc9       | 514.93 | 411.05 | 385.88 | 413.76 | 404.9  | 384.79 | 361.74 | 219.54 | 263.3  | 246.19 | 426.104 | 295.11 | 1.44      | 9.872171728 |
| 1455701_at   | Snx26         | 90.78  | 101.87 | 121.77 | 121.62 | 100.7  | 62.8   | 64.39  | 72.31  | 74.98  | 97.45  | 107.348 | 74.386 | 1.44      | 5.986067289 |
| 1417271_a_at | Eng           | 935.89 | 691.34 | 887.06 | 900.87 | 1031.3 | 564.62 | 633.11 | 625.8  | 681.25 | 580.23 | 889.298 | 617    | 1.44      | 2.918890699 |
| 1441753_at   | 4921505C17Rik | 203.89 | 171.98 | 167.97 | 140.37 | 153.15 | 139.52 | 94.45  | 82     | 128.26 | 137.77 | 167.472 | 116.4  | 1.44      | 11.33922971 |

Table S1. CMP to GMP transition gene signature in control mice.

**Genes down-regulated in GMPs compared to CMPs (= CMPs gene signature)**

| Probe Set    | Gene Symbol   | CMPs   |        |        |        |        | GMPs   |        |        |        |        | Av Cont | Av Mut | Fold Diff | q-value(%)  |
|--------------|---------------|--------|--------|--------|--------|--------|--------|--------|--------|--------|--------|---------|--------|-----------|-------------|
|              |               | CMP3   | CMP4   | CMP6   | CMP8   | CMP10  | GMP3   | GMP4   | GMP6   | GMP8   | GMP10  |         |        |           |             |
| 1418084_at   | Nrp1          | 398.54 | 356.54 | 334.76 | 294.38 | 351.72 | 221.02 | 263.79 | 253.82 | 261.47 | 207.45 | 347.188 | 241.51 | 1.44      | 2.583218269 |
| 1423462_at   | Map3k7ip2     | 3908.4 | 2516.6 | 3537.8 | 2674.8 | 3138.6 | 2288.7 | 1852.3 | 2150   | 2294.8 | 2406.6 | 3155.22 | 2198.5 | 1.44      | 8.035551262 |
| 1421469_a_at | Stat5a        | 511.89 | 387.49 | 607.33 | 432.81 | 570.64 | 401.06 | 391.54 | 340.91 | 339    | 285.39 | 502.032 | 351.58 | 1.43      | 9.872171728 |
| 1450857_a_at | Col1a2        | 97.34  | 97.72  | 96.73  | 63.17  | 77.74  | 61.51  | 61.55  | 60     | 60     | 60     | 86.54   | 60.612 | 1.43      | 6.981670997 |
| 1418710_at   | Cd59a         | 310.43 | 257.25 | 227.06 | 298.97 | 268.79 | 205    | 197.05 | 158.63 | 156.85 | 237.99 | 272.5   | 191.1  | 1.43      | 5.986067289 |
| 1437253_at   | A630054L15Rik | 224.39 | 221.11 | 218.2  | 229.36 | 215    | 148.02 | 140.94 | 173.28 | 176.4  | 138.98 | 221.612 | 155.52 | 1.42      | 0           |
| 1454739_at   | Cdc27         | 705.41 | 678.74 | 806.86 | 673.62 | 684.51 | 574.05 | 586.44 | 434.34 | 444.27 | 452.03 | 709.828 | 498.23 | 1.42      | 2.583218269 |
| 1429749_at   | Sfmbt1        | 157.47 | 158.69 | 142.52 | 161.02 | 143.42 | 118.59 | 91.98  | 93.95  | 121.65 | 109.81 | 152.624 | 107.2  | 1.42      | 1.655909147 |
| 1458980_at   | ---           | 525.96 | 410.67 | 466.23 | 409.12 | 508.04 | 281.83 | 304.02 | 295.78 | 322.86 | 426.95 | 464.004 | 326.29 | 1.42      | 5.876757684 |
| 1440033_at   | ---           | 168.66 | 150.95 | 135.9  | 166.07 | 186.55 | 97.98  | 107.23 | 97.86  | 131.26 | 135.17 | 161.626 | 113.9  | 1.42      | 5.118264635 |
| 1420493_a_at | Pcyt2         | 863.54 | 731.78 | 623.68 | 808.06 | 598.6  | 544.91 | 621.23 | 446.39 | 442.12 | 501.44 | 725.132 | 511.22 | 1.42      | 8.035551262 |
| 1443889_at   | 9030619P08Rik | 221.92 | 228.14 | 219.13 | 233.52 | 292.57 | 151.89 | 203.64 | 168.53 | 193.39 | 125.93 | 239.056 | 168.68 | 1.42      | 6.981670997 |
| 1434745_at   | Ccnd2         | 5765.6 | 5594.8 | 4763.9 | 4781.2 | 6293   | 3703.5 | 3981.7 | 2713.4 | 4229.2 | 4672.2 | 5439.69 | 3860   | 1.41      | 6.981670997 |
| 1423622_a_at | Ccnl1         | 4081.6 | 3122   | 3441.8 | 2688.9 | 3524.2 | 1869   | 2352.4 | 2198.1 | 2599.3 | 3013.7 | 3371.71 | 2406.5 | 1.40      | 11.33922971 |
| 1419642_at   | Purb          | 868.15 | 886.61 | 920.31 | 636.32 | 878.34 | 466.29 | 558.83 | 606.7  | 657.04 | 708.41 | 837.946 | 599.45 | 1.40      | 6.981670997 |
| 1435069_at   | BC064078      | 144.49 | 107.68 | 169.14 | 130.05 | 158.3  | 116.28 | 86.78  | 104.63 | 110.96 | 90.45  | 141.932 | 101.82 | 1.39      | 9.872171728 |
| 1452310_at   | Tada2l        | 557.7  | 600.96 | 506.19 | 539.91 | 551.8  | 509.04 | 412.23 | 378.96 | 320.16 | 363.42 | 551.312 | 396.76 | 1.39      | 3.863788009 |
| 1425615_a_at | Pck2          | 1275.2 | 1632.6 | 1595.2 | 1511.2 | 1664.7 | 1209.8 | 1280.3 | 978.34 | 1157   | 908.64 | 1535.77 | 1106.8 | 1.39      | 3.863788009 |
| 1455042_at   | ---           | 779.51 | 735.39 | 689.83 | 831.33 | 640.02 | 603.59 | 630.12 | 590.73 | 431.43 | 398.89 | 735.216 | 530.95 | 1.38      | 8.035551262 |
| 1422737_at   | Ncoa3         | 221.42 | 245.19 | 214.63 | 245.48 | 215.42 | 197.52 | 152.92 | 198.63 | 167.05 | 109.7  | 228.428 | 165.16 | 1.38      | 8.035551262 |
| 1435762_at   | Pacs1         | 485.76 | 413.1  | 399.47 | 397.52 | 431.03 | 298.51 | 310.06 | 344.14 | 259.76 | 336.12 | 425.376 | 309.72 | 1.37      | 2.583218269 |
| 1451564_at   | Parp14        | 680.39 | 573.61 | 560.85 | 590.26 | 651.65 | 615.01 | 419.72 | 399.99 | 353.28 | 441.98 | 611.352 | 446    | 1.37      | 9.872171728 |
| 1458218_s_at | Pde7a         | 383.62 | 324.72 | 426.39 | 355.08 | 397.1  | 290.69 | 220.09 | 350.66 | 244.96 | 276.03 | 377.382 | 276.49 | 1.36      | 8.035551262 |
| 1417295_at   | Mta1          | 658.38 | 525.84 | 610.17 | 553.46 | 684.03 | 486.04 | 493.3  | 462.58 | 347.75 | 432.72 | 606.376 | 444.48 | 1.36      | 5.118264635 |
| 1417302_at   | Rcor2         | 127.66 | 161.23 | 132.97 | 157.57 | 135.28 | 113.47 | 109.91 | 107.57 | 98.36  | 95.91  | 142.942 | 105.04 | 1.36      | 2.583218269 |
| 1434564_at   | E2f3          | 660.12 | 762.55 | 851.14 | 780.09 | 784.92 | 484.93 | 604.37 | 582.3  | 603.07 | 558.78 | 767.764 | 566.69 | 1.35      | 2.583218269 |
| 1422675_at   | Smarce1       | 2639.8 | 1879.1 | 2039.3 | 1895.1 | 2070.9 | 1666.8 | 1713.4 | 1274.6 | 1613.2 | 1578.3 | 2104.83 | 1569.2 | 1.34      | 8.934207489 |
| 1429588_at   | 2810474O19Rik | 928.03 | 923.47 | 850.83 | 977.04 | 848.02 | 712.02 | 753.49 | 632.5  | 676.25 | 614.33 | 905.478 | 677.72 | 1.34      | 1.655909147 |
| 1416532_at   | Trrap         | 1439.1 | 1209.3 | 1146.7 | 1543.4 | 1289   | 941.25 | 893.99 | 1010.1 | 1004   | 1122.7 | 1325.49 | 994.39 | 1.33      | 5.118264635 |
| 1445161_at   | Usp6nl        | 201.31 | 161.76 | 175.86 | 160.95 | 180.88 | 139.67 | 103.78 | 144.84 | 124.93 | 149.06 | 176.152 | 132.46 | 1.33      | 5.876757684 |
| 1455481_at   | Ids           | 620.44 | 470.52 | 619.96 | 587.34 | 651.04 | 497.16 | 456.71 | 458.4  | 375.32 | 437.95 | 589.86  | 445.11 | 1.33      | 5.876757684 |
| 1417223_at   | Cd2bp2        | 1037   | 890.04 | 1002.2 | 1037.5 | 1140.5 | 907.62 | 774.45 | 644.86 | 837.32 | 694.31 | 1021.47 | 771.71 | 1.32      | 5.118264635 |
| 1454919_at   | Nmt2          | 1129.5 | 962.54 | 745.41 | 1051   | 886.38 | 687.62 | 723.41 | 671.56 | 741.49 | 790.97 | 954.958 | 723.01 | 1.32      | 9.872171728 |
| 1454636_at   | Cbx5          | 3078.7 | 3011.5 | 3482.7 | 2981   | 3119.7 | 2225.5 | 2606.1 | 2131.5 | 2603.3 | 2301.9 | 3134.71 | 2373.7 | 1.32      | 2.002494782 |
| 1421923_at   | Sh3bp5        | 169.65 | 158.15 | 174.35 | 152.93 | 166.45 | 151.93 | 140.88 | 111.29 | 112.25 | 106.19 | 164.306 | 124.51 | 1.32      | 5.876757684 |
| 1453095_at   | Rab10         | 2513.2 | 2495.5 | 2832.7 | 2360.6 | 2505.3 | 1748.3 | 1806.3 | 1967.1 | 2053   | 2119.9 | 2541.44 | 1938.9 | 1.31      | 2.002494782 |
| 1426241_a_at | Scmh1         | 265.8  | 244.13 | 260.23 | 304.2  | 250.98 | 250.39 | 215.96 | 194.97 | 191.88 | 160.45 | 265.068 | 202.73 | 1.31      | 8.934207489 |



Table S1. CMP to GMP transition gene signature in control mice.

**Genes down-regulated in GMPs compared to CMPs (= CMPs gene signature)**

| Probe Set    | Gene Symbol      | CMPs   |        |        |        |        | GMPs   |        |        |        |        | Av Cont | Av Mut | Fold Diff | q-value(%)  |
|--------------|------------------|--------|--------|--------|--------|--------|--------|--------|--------|--------|--------|---------|--------|-----------|-------------|
|              |                  | CMP3   | CMP4   | CMP6   | CMP8   | CMP10  | GMP3   | GMP4   | GMP6   | GMP8   | GMP10  |         |        |           |             |
| 1425014_at   | Nr2c2            | 77.81  | 101.45 | 92.31  | 117.17 | 92.96  | 76.7   | 77.59  | 66.35  | 75.25  | 73.12  | 96.34   | 73.802 | 1.31      | 9.872171728 |
| 1428881_at   | Klc1 /// LOC1000 | 390.47 | 411.04 | 444.89 | 394.93 | 399.25 | 399.03 | 354.22 | 259.98 | 279.33 | 274.59 | 408.116 | 313.43 | 1.30      | 9.872171728 |
| 1417038_at   | Sept9            | 1909.3 | 2159.8 | 2720.4 | 2373.1 | 2356.8 | 1862.2 | 1823.8 | 1747.9 | 1670.3 | 1774.5 | 2303.87 | 1775.7 | 1.30      | 5.986067289 |
| 1446107_at   | ---              | 94.78  | 105.83 | 91.35  | 97.41  | 81.78  | 67.13  | 60     | 69.66  | 85.8   | 80.93  | 94.23   | 72.704 | 1.30      | 8.035551262 |
| 1428787_at   | Nckap1l          | 1010.6 | 986.46 | 1029.5 | 981.03 | 1026.2 | 860.24 | 776.18 | 686.34 | 908.15 | 659.86 | 1006.77 | 778.15 | 1.29      | 2.918890699 |
| 1433759_at   | Dpy19l1          | 920.84 | 858.7  | 814.8  | 682.99 | 760.57 | 593.65 | 621.81 | 571.43 | 667.41 | 674.72 | 807.58  | 625.8  | 1.29      | 5.118264635 |
| 1451459_at   | Ahctf1           | 922.16 | 886.57 | 830.58 | 817.19 | 888.34 | 721.47 | 695.61 | 650.64 | 689.49 | 676.37 | 868.968 | 686.72 | 1.27      | 0           |
| 1416963_at   | Ubac1            | 1183.6 | 1219.1 | 1082   | 1234.7 | 1124.9 | 1172.2 | 902.96 | 811.18 | 923.86 | 828.67 | 1168.85 | 927.77 | 1.26      | 8.934207489 |
| 1427981_a_at | Csad             | 284.48 | 248.11 | 231.64 | 244.92 | 269.71 | 206.26 | 183.52 | 191.74 | 210.81 | 227.58 | 255.772 | 203.98 | 1.25      | 4.305363781 |
| 1433951_at   | Arl5a            | 783.69 | 762.53 | 748.51 | 817.3  | 757.33 | 674.36 | 633.86 | 665.37 | 524.34 | 590.04 | 773.872 | 617.59 | 1.25      | 2.583218269 |
| 1428854_at   | Tmed8            | 452.55 | 366.93 | 447.03 | 446.61 | 425.91 | 315.95 | 331.83 | 371.4  | 362.24 | 331.35 | 427.806 | 342.55 | 1.25      | 3.376755907 |
| 1418261_at   | Syk              | 4562.1 | 4050.1 | 3358.3 | 3863.3 | 3645.1 | 3241.6 | 3425   | 2769.4 | 3129.1 | 3035.3 | 3895.79 | 3120.1 | 1.25      | 8.934207489 |
| 1419359_at   | Hexim1           | 228.61 | 215.17 | 228.04 | 210.94 | 181.4  | 182.22 | 173.83 | 182.85 | 172.55 | 143.12 | 212.832 | 170.91 | 1.25      | 6.981670997 |
| 1429499_at   | Fbxo5            | 2613.6 | 2160.8 | 2111.6 | 2295.5 | 2251.4 | 1720.6 | 2164.3 | 1800.1 | 1752.7 | 1777.4 | 2286.57 | 1843   | 1.24      | 6.981670997 |
| 1415726_at   | Ankrd17          | 1186.9 | 1197.8 | 1113.9 | 1098.4 | 1049.2 | 1078.8 | 890.84 | 848.36 | 839.97 | 908.29 | 1129.24 | 913.24 | 1.24      | 4.305363781 |
| 1416419_s_at | Gabarapl1        | 1530.3 | 1625.6 | 1420.7 | 1471.3 | 1698.7 | 1245   | 1290.6 | 982.48 | 1340.2 | 1414.9 | 1549.32 | 1254.6 | 1.23      | 9.872171728 |
| 1448361_at   | Ttc3             | 3317.7 | 3367.9 | 3467   | 3031.5 | 3613   | 2324.9 | 2734.4 | 2531.6 | 3151.6 | 2912.9 | 3359.42 | 2731.1 | 1.23      | 6.981670997 |
| 1437633_at   | Ankrd11 /// LOC6 | 605.31 | 557.77 | 646.97 | 538.74 | 602.43 | 414.03 | 503.2  | 434.2  | 566.88 | 483.36 | 590.244 | 480.33 | 1.23      | 9.872171728 |
| 1423975_s_at | Numa1            | 1999.5 | 1816.2 | 1977.4 | 1889.6 | 1898.3 | 1909.3 | 1564.9 | 1293.1 | 1513.8 | 1549.4 | 1916.17 | 1566.1 | 1.22      | 8.934207489 |
| 1455035_s_at | Nol5a            | 5690.6 | 4483.1 | 5334.5 | 5723.7 | 4994.3 | 4440.1 | 3977.8 | 4007.6 | 4261.6 | 4841.6 | 5245.25 | 4305.7 | 1.22      | 9.872171728 |
| 1453032_at   | Mobkl3           | 965.89 | 863.73 | 958.06 | 954.12 | 971.4  | 711.28 | 835.74 | 822.83 | 686.47 | 841    | 942.64  | 779.46 | 1.21      | 4.305363781 |
| 1434997_at   | Cdc2l6           | 1196   | 1414.8 | 1477.4 | 1540   | 1472.1 | 1149.1 | 1237.8 | 1226.3 | 1147.1 | 1192.6 | 1420.07 | 1190.6 | 1.19      | 6.981670997 |
| 1426525_at   | Arid2            | 3416.5 | 3178.1 | 3089.6 | 2681.8 | 2902.2 | 2421.5 | 2587.3 | 2660.5 | 2613.4 | 2641.6 | 3053.61 | 2584.9 | 1.18      | 8.035551262 |

Table S2. Pbx1-regulated genes in CMPs

**Genes up-regulated in the absence of Pbx1**

| Probe Set    | Gene Symbol       | Controls |        |        |        |         | Mutants |        |        |        | Average Cont | Average Mut | Fold Diff. | q-value(%)  |
|--------------|-------------------|----------|--------|--------|--------|---------|---------|--------|--------|--------|--------------|-------------|------------|-------------|
|              |                   | CMP3     | CMP4   | CMP6   | CMP8   | CMP10   | CMP1    | CMP2   | CMP5   | CMP7   |              |             |            |             |
| 1437745_at   | Chd7              | 97.03    | 161.22 | 183.23 | 89.43  | 73.57   | 1121.5  | 373.76 | 815.42 | 612.36 | 120.896      | 730.76      | 6.04       | 10.42419758 |
| 1449184_at   | Pglyrp1           | 60       | 158.85 | 173.53 | 131.62 | 85.44   | 772.85  | 289.44 | 1046.8 | 735.49 | 121.888      | 711.155     | 5.83       | 10.58793513 |
| 1438511_a_at | 1190002H23Rik     | 504.43   | 695.87 | 558.6  | 486.67 | 243.03  | 2648.8  | 1831.5 | 3236   | 1507.7 | 497.72       | 2305.9975   | 4.63       | 7.013521794 |
| 1429764_at   | 1500005K14Rik     | 82.94    | 175.01 | 177.85 | 228.61 | 147.58  | 776.27  | 546.26 | 851.02 | 505.11 | 162.398      | 669.665     | 4.12       | 4.172804729 |
| 1456765_at   | 6430511F03 /// EG | 236.95   | 243.84 | 200.06 | 324.27 | 191.5   | 1052.4  | 483.34 | 645.88 | 1214.9 | 239.324      | 849.13      | 3.55       | 12.71951321 |
| 1434499_a_at | Ldhb              | 639.73   | 376.82 | 366.4  | 509.15 | 254.65  | 1748.5  | 1048.3 | 1194.9 | 1949.2 | 429.35       | 1485.225    | 3.46       | 6.965891765 |
| 1441092_at   | 9330159M07Rik     | 99.36    | 60     | 60     | 60     | 60      | 241.46  | 276.05 | 109.24 | 190.52 | 67.872       | 204.3175    | 3.01       | 11.91840305 |
| 1419029_at   | Ero1l             | 123.88   | 409.59 | 431.67 | 341.73 | 258.18  | 879.12  | 675.95 | 981.26 | 979.96 | 313.01       | 879.0725    | 2.81       | 4.172804729 |
| 1451970_at   | Daglb             | 147.05   | 132.32 | 203.38 | 72.81  | 125.41  | 283.1   | 347.1  | 392.14 | 375.13 | 136.194      | 349.3675    | 2.57       | 4.172804729 |
| 1420407_at   | Ltb4r1            | 432.82   | 394.05 | 301.83 | 355.8  | 256.5   | 1192.2  | 645.76 | 970.17 | 743.24 | 348.2        | 887.845     | 2.55       | 8.766902243 |
| 1449773_s_at | Gadd45b           | 304.51   | 180.18 | 182.2  | 190.87 | 141.15  | 666.55  | 357.12 | 472.25 | 448.57 | 199.782      | 486.1225    | 2.43       | 10.42419758 |
| 1428289_at   | Klf9              | 1179.4   | 1146.9 | 752.36 | 1441.4 | 986.21  | 2833.4  | 3600.4 | 2045.2 | 2172.3 | 1101.254     | 2662.815    | 2.42       | 8.766902243 |
| 1424032_at   | Hvcn1             | 260.56   | 458.89 | 476.06 | 258.53 | 297.24  | 1093.4  | 760.29 | 735.95 | 765.97 | 350.256      | 838.89      | 2.40       | 6.965891765 |
| 1428129_at   | Lman1             | 77.99    | 146.21 | 153.92 | 79.56  | 97.47   | 289.78  | 200.09 | 319.48 | 245.79 | 111.03       | 263.785     | 2.38       | 6.965891765 |
| 1435055_a_at | Tom1              | 952.77   | 777.48 | 693.51 | 1067.4 | 666.37  | 2160.4  | 1677.8 | 1835.9 | 2140.8 | 831.502      | 1953.7175   | 2.35       | 0           |
| 1435462_at   | Plcxd2            | 60       | 104.62 | 112.74 | 101.73 | 87.19   | 218.46  | 181.85 | 269.2  | 199.28 | 93.256       | 217.1975    | 2.33       | 4.172804729 |
| 1429190_at   | Arsb              | 60       | 79.1   | 71.04  | 63.91  | 60      | 194.92  | 131.42 | 160.58 | 132.61 | 66.81        | 154.8825    | 2.32       | 4.172804729 |
| 1426343_at   | Stt3b             | 447.71   | 445.38 | 561.74 | 506.58 | 409.45  | 909.16  | 1086.4 | 1205.8 | 1081.7 | 474.172      | 1070.77     | 2.26       | 0           |
| 1460273_a_at | Naip2             | 335.14   | 304.59 | 238.29 | 201.56 | 119.26  | 547.55  | 611.64 | 430.08 | 518.91 | 239.768      | 527.045     | 2.20       | 6.965891765 |
| 1428544_at   | 0610007L01Rik     | 378.51   | 549.1  | 541.97 | 491.39 | 434.99  | 1229.9  | 781.01 | 1150.2 | 1052.1 | 479.192      | 1053.275    | 2.20       | 4.172804729 |
| 1420822_s_at | Sgpp1             | 479.93   | 416.38 | 454.15 | 426.3  | 342.84  | 815.41  | 663.8  | 1307.6 | 907.03 | 423.92       | 923.45      | 2.18       | 12.10755341 |
| 1449221_a_at | Rrbp1             | 337.71   | 358.96 | 362.51 | 647.42 | 385.84  | 909.86  | 724.9  | 990.29 | 1019.3 | 418.488      | 911.0775    | 2.18       | 6.061547922 |
| 1421957_a_at | Pcyt1a            | 244.76   | 369.04 | 320.17 | 379.2  | 260.7   | 834.48  | 538.54 | 642.41 | 703.66 | 314.774      | 679.7725    | 2.16       | 4.798725438 |
| 1444090_at   | Pram1             | 157.97   | 129.02 | 178.08 | 136.53 | 136.29  | 295.68  | 214.71 | 333.62 | 387.5  | 147.578      | 307.8775    | 2.09       | 8.766902243 |
| 1426123_a_at | Rrbp1             | 380.03   | 256.14 | 234.6  | 403.14 | 231.66  | 586.18  | 582.21 | 623.56 | 696.53 | 301.114      | 622.12      | 2.07       | 4.172804729 |
| 1424058_at   | Prrc1             | 570.95   | 930.45 | 823.19 | 760.69 | 731.13  | 1508.2  | 1666.1 | 1430.1 | 1665.2 | 763.282      | 1567.3875   | 2.05       | 0           |
| 1427509_at   | Baiap3            | 97.49    | 97.37  | 80.16  | 92.69  | 88.77   | 159.17  | 254.47 | 174.29 | 151.93 | 91.296       | 184.965     | 2.03       | 9.641274853 |
| 1435259_s_at | Tmem141           | 151.35   | 231.59 | 186.2  | 220.05 | 154.4   | 342.24  | 384.44 | 304.92 | 494.54 | 188.718      | 381.535     | 2.02       | 8.766902243 |
| 1457287_at   | ---               | 164.92   | 322.02 | 365.85 | 403    | 341.59  | 797.75  | 453.3  | 632.41 | 695.59 | 319.476      | 644.7625    | 2.02       | 11.91840305 |
| 1448571_a_at | Gmfb              | 218.99   | 161.87 | 176.85 | 218.57 | 152     | 341.75  | 332.82 | 342.75 | 454.8  | 185.656      | 368.03      | 1.98       | 4.297366064 |
| 1439163_at   | Zbtb16            | 352.8    | 347.42 | 237.9  | 332.39 | 262.46  | 546.53  | 661.89 | 485    | 700.25 | 306.594      | 598.4175    | 1.95       | 6.061547922 |
| 1434223_at   | 1810007P19Rik /// | 74.5     | 64.79  | 80.22  | 64.56  | 83.79   | 161.44  | 134.35 | 137.15 | 138.76 | 73.572       | 142.925     | 1.94       | 0           |
| 1418888_a_at | Sepx1             | 764      | 1432.7 | 1023.5 | 1222.5 | 835.76  | 2029.6  | 1451.8 | 2296.7 | 2319.3 | 1055.688     | 2024.3325   | 1.92       | 10.42419758 |
| 1443870_at   | Abcc4             | 659.46   | 785.25 | 651.17 | 622.14 | 522.29  | 1351.9  | 792.85 | 1332.8 | 1492.1 | 648.062      | 1242.4025   | 1.92       | 10.58793513 |
| 1427299_at   | Rps6ka3           | 157.18   | 173.31 | 211.58 | 134.14 | 183.2   | 391.77  | 373.01 | 265.35 | 282.77 | 171.882      | 328.225     | 1.91       | 8.097849177 |
| 1423883_at   | Acs1l             | 1249.9   | 1593.3 | 1084   | 1424.1 | 1057.19 | 2609.6  | 2242.2 | 2390.1 | 2512.5 | 1281.694     | 2438.61     | 1.90       | 0           |
| 1436531_at   | Metap2            | 688.5    | 569.09 | 606.04 | 697.36 | 641.46  | 1147.9  | 998.34 | 1128.6 | 1593.2 | 640.49       | 1217.01     | 1.90       | 8.48555108  |

Table S2. Pbx1-regulated genes in CMPs

## Genes up-regulated in the absence of Pbx1

| Probe Set    | Gene Symbol   | Controls |        |        |        |         | Mutants |        |        |        | Average Cont | Average Mut | Fold Diff. | q-value(%)  |
|--------------|---------------|----------|--------|--------|--------|---------|---------|--------|--------|--------|--------------|-------------|------------|-------------|
|              |               | CMP3     | CMP4   | CMP6   | CMP8   | CMP10   | CMP1    | CMP2   | CMP5   | CMP7   |              |             |            |             |
| 1427200_at   | Zranb1        | 108.75   | 194.71 | 197.4  | 214.83 | 153.36  | 322.31  | 298.62 | 282.26 | 412.1  | 173.81       | 328.8225    | 1.89       | 8.766902243 |
| 1445181_at   | Eml5          | 66.9     | 86.47  | 94.12  | 74.23  | 91.62   | 130.99  | 146.53 | 145.64 | 190.49 | 82.668       | 153.4125    | 1.86       | 6.337939258 |
| 1455244_at   | Daam1         | 478.53   | 350.78 | 348.65 | 306.07 | 266.33  | 661.23  | 713.27 | 597.22 | 626.34 | 350.072      | 649.515     | 1.86       | 4.172804729 |
| 1427364_a_at | Odc1          | 850.46   | 939.22 | 603.48 | 1053.8 | 774.29  | 1488.4  | 1829.6 | 1633.3 | 1286.7 | 844.256      | 1559.5175   | 1.85       | 6.337939258 |
| 1437868_at   | BC023892      | 830.99   | 749.38 | 624.69 | 932.36 | 633.37  | 1204.5  | 1698.8 | 1108.7 | 1488.5 | 754.158      | 1375.12     | 1.82       | 8.766902243 |
| 1418226_at   | Orc2l         | 421.68   | 421.29 | 495.92 | 670.31 | 579.25  | 792.8   | 1064.3 | 839.85 | 1009.5 | 517.69       | 926.6025    | 1.79       | 6.965891765 |
| 1419798_at   | 2610019E17Rik | 60       | 96.96  | 92.29  | 92.34  | 78.44   | 119.64  | 147.56 | 183.87 | 149.17 | 84.006       | 150.06      | 1.79       | 8.766902243 |
| 1423233_at   | Cebpd         | 534.06   | 622.63 | 632.2  | 724.48 | 347.12  | 1244    | 872.75 | 1021.7 | 907.63 | 572.098      | 1011.51     | 1.77       | 10.42419758 |
| 1435091_at   | Zfp568        | 337.84   | 570.4  | 573.26 | 561.38 | 637.56  | 976.46  | 742.96 | 1004.3 | 1066.7 | 536.088      | 947.6       | 1.77       | 8.48555108  |
| 1420548_a_at | 2310008H09Rik | 143.43   | 142.39 | 144.11 | 102.63 | 125.49  | 189.99  | 286.9  | 220.75 | 227.57 | 131.61       | 231.3025    | 1.76       | 8.097849177 |
| 1428667_at   | Maoa          | 340.02   | 437.88 | 565.35 | 505.38 | 525.92  | 808.25  | 669.78 | 859.64 | 902.88 | 474.91       | 810.1375    | 1.71       | 6.965891765 |
| 1457825_x_at | Tcn2          | 859.8    | 737.52 | 530.89 | 859.96 | 597.05  | 1508.7  | 1079.1 | 1141.5 | 1154   | 717.044      | 1220.82     | 1.70       | 10.42419758 |
| 1442025_a_at | ---           | 211.1    | 215.79 | 138.12 | 254.81 | 205.02  | 361.24  | 380    | 256.14 | 391.14 | 204.968      | 347.13      | 1.69       | 11.91840305 |
| 1458431_at   | Eif4g2        | 60       | 70.25  | 70.19  | 74.26  | 67.74   | 125.14  | 126.77 | 101.99 | 109.8  | 68.488       | 115.925     | 1.69       | 0           |
| 1418703_at   | Rbms1         | 296.97   | 512.61 | 597.52 | 376.69 | 526.95  | 657.77  | 857.14 | 718.28 | 880.59 | 462.148      | 778.445     | 1.68       | 11.91840305 |
| 1423747_a_at | Pdk1          | 2157.1   | 1911.1 | 1740   | 2659.6 | 1720.36 | 3828.4  | 2561.8 | 3448.4 | 3771.3 | 2037.628     | 3402.495    | 1.67       | 10.58793513 |
| 1439060_s_at | Wipi1         | 211.15   | 177.78 | 150.98 | 176.1  | 150.99  | 349.77  | 318.96 | 244.49 | 244.05 | 173.4        | 289.3175    | 1.67       | 10.42419758 |
| 1417764_at   | Ssr1          | 563.56   | 670.77 | 637.26 | 798.06 | 646.29  | 1144    | 848.35 | 1311.6 | 1094.6 | 663.188      | 1099.6375   | 1.66       | 8.766902243 |
| 1441272_at   | Matr3         | 947.54   | 574.41 | 550.6  | 775.71 | 846.79  | 1104.2  | 1103.7 | 1383.8 | 1273   | 739.01       | 1216.1625   | 1.65       | 9.641274853 |
| 1417513_at   | Evi5          | 650.16   | 608.92 | 603.41 | 678.77 | 615.9   | 1163.6  | 886.57 | 825.94 | 1280.2 | 631.432      | 1039.0775   | 1.65       | 10.58793513 |
| 1431064_at   | Dpp8          | 268.71   | 245.74 | 265.32 | 224.46 | 167.64  | 339.42  | 457.43 | 349.08 | 364.78 | 234.374      | 377.6775    | 1.61       | 8.766902243 |
| 1423196_at   | Nedd1         | 70.3     | 115.75 | 140.94 | 122.27 | 96.28   | 182.29  | 190.97 | 176.29 | 153.15 | 109.108      | 175.675     | 1.61       | 10.42419758 |
| 1434942_at   | Esf1          | 711.52   | 930.74 | 853.9  | 1062.3 | 1018.36 | 1238.9  | 1399.1 | 1676.1 | 1581.3 | 915.366      | 1473.8325   | 1.61       | 7.270796118 |
| 1422570_at   | Yy1           | 447.89   | 411.66 | 384.19 | 523.86 | 496.72  | 732.42  | 812.19 | 559.39 | 779.56 | 452.864      | 720.89      | 1.59       | 8.766902243 |
| 1458040_at   | ---           | 101.94   | 96.96  | 105.6  | 93.52  | 86.25   | 136.09  | 119.65 | 176.17 | 181.19 | 96.854       | 153.275     | 1.58       | 11.91840305 |
| 1435430_at   | Tmem1         | 1443.2   | 1268.2 | 1544.9 | 1435.5 | 1380.53 | 2402.1  | 1744.1 | 2404.3 | 2373.7 | 1414.442     | 2231.0375   | 1.58       | 6.337939258 |
| 1444705_at   | ---           | 116.04   | 114.01 | 108.5  | 113.23 | 81.83   | 198.14  | 126.39 | 169.34 | 176.93 | 106.722      | 167.7       | 1.57       | 12.10755341 |
| 1423943_at   | Dus1l         | 1787.9   | 2003.1 | 2016.3 | 1955.5 | 1907.14 | 2767.2  | 3769.7 | 3112.8 | 2454.1 | 1933.978     | 3025.975    | 1.56       | 10.42419758 |
| 1441850_x_at | Tcn2          | 332.35   | 353.79 | 262.01 | 340.62 | 241.86  | 548.77  | 425.16 | 457.85 | 483.2  | 306.126      | 478.745     | 1.56       | 7.270796118 |
| 1423394_at   | Pcyox1        | 420.29   | 508.93 | 554.54 | 470.39 | 584.85  | 845.12  | 664.43 | 713.32 | 937.12 | 507.8        | 789.9975    | 1.56       | 10.42419758 |
| 1451776_s_at | Hopx          | 60       | 60     | 60     | 63.72  | 60      | 78.53   | 86.66  | 96.35  | 116.01 | 60.744       | 94.3875     | 1.55       | 8.766902243 |
| 1452145_at   | H6pd          | 1133.1   | 941.15 | 733.63 | 1054   | 803.46  | 1621.8  | 1494.3 | 1191.5 | 1483.8 | 933.054      | 1447.8525   | 1.55       | 9.641274853 |
| 1418899_at   | Ufm1          | 654.6    | 515.65 | 435.4  | 714.58 | 597.05  | 888     | 1059.5 | 856.68 | 815.04 | 583.456      | 904.81      | 1.55       | 10.42419758 |
| 1426977_at   | Usp47         | 583.9    | 840.01 | 877.77 | 646.61 | 848.1   | 986.59  | 1241.3 | 1202.5 | 1275.2 | 759.278      | 1176.3725   | 1.55       | 8.766902243 |
| 1423967_at   | Palm          | 511.46   | 635.39 | 530.33 | 662.4  | 542.87  | 966.17  | 713.03 | 880.67 | 1012.5 | 576.49       | 893.08      | 1.55       | 8.766902243 |
| 1449694_s_at | Commd5        | 264.14   | 241.68 | 228.39 | 258.52 | 228.61  | 375.68  | 439.9  | 323.11 | 368.77 | 244.268      | 376.865     | 1.54       | 4.798725438 |
| 1455658_at   | Cggbp1        | 266.51   | 326.38 | 297.63 | 277.49 | 298.78  | 402.97  | 404.45 | 427.34 | 563.33 | 293.358      | 449.5225    | 1.53       | 10.42419758 |

Table S2. Pbx1-regulated genes in CMPs

## Genes up-regulated in the absence of Pbx1

| Probe Set    | Gene Symbol   | Controls |        |        |        |         | Mutants |        |        |        | Average Cont | Average Mut | Fold Diff. | q-value(%)  |
|--------------|---------------|----------|--------|--------|--------|---------|---------|--------|--------|--------|--------------|-------------|------------|-------------|
|              |               | CMP3     | CMP4   | CMP6   | CMP8   | CMP10   | CMP1    | CMP2   | CMP5   | CMP7   |              |             |            |             |
| 1418339_at   | Recql         | 893.66   | 657.47 | 698.92 | 858.07 | 957.37  | 1151.9  | 1178.6 | 1126.6 | 1526   | 813.098      | 1245.7575   | 1.53       | 11.91840305 |
| 1428232_at   | Cpsf6         | 981.65   | 557.94 | 616.52 | 714.22 | 718.71  | 1144.8  | 1114.9 | 1136   | 985.44 | 717.808      | 1095.2775   | 1.53       | 10.42419758 |
| 1434870_at   | 2810004N23Rik | 562.52   | 506.34 | 511.35 | 580.56 | 724.4   | 843.89  | 858.61 | 768.22 | 1039.4 | 577.034      | 877.54      | 1.52       | 9.641274853 |
| 1423871_at   | Tmem63a       | 505.52   | 629.77 | 573.21 | 669.63 | 600.02  | 853.93  | 994.23 | 810.75 | 959.14 | 595.63       | 904.5125    | 1.52       | 4.172804729 |
| 1437982_x_at | Cox15         | 749.86   | 524.24 | 570.12 | 704.84 | 628.53  | 929.22  | 907.98 | 1099.5 | 905.96 | 635.518      | 960.665     | 1.51       | 6.965891765 |
| 1415697_at   | G3bp2         | 1243.3   | 1154.1 | 1239.8 | 1716.8 | 1228.41 | 2000.3  | 1703.6 | 2016.5 | 2193   | 1316.466     | 1978.3275   | 1.50       | 8.766902243 |
| 1428508_at   | Tbc1d2b       | 669.21   | 635.06 | 530.38 | 493.13 | 627.49  | 931.63  | 825.73 | 893.21 | 894.59 | 591.054      | 886.29      | 1.50       | 3.427661027 |
| 1448795_a_at | Tbrg4         | 734.13   | 679.2  | 668    | 685.75 | 660.14  | 1193.4  | 1143.7 | 936.74 | 835.26 | 685.444      | 1027.27     | 1.50       | 9.641274853 |
| 1428146_s_at | Acaa2         | 1569.8   | 1834.8 | 1779.4 | 1453.2 | 1599.8  | 2367    | 2761.5 | 2187.6 | 2528.3 | 1647.384     | 2461.08     | 1.49       | 4.297366064 |
| 1416610_a_at | Clcn3         | 222.04   | 330.99 | 281.52 | 264.41 | 319.19  | 365.38  | 391.35 | 435.19 | 497.85 | 283.63       | 422.4425    | 1.49       | 11.91840305 |
| 1434216_a_at | Nudt19        | 831.57   | 921.33 | 753    | 655.17 | 612.24  | 1212.2  | 1095.7 | 1138.6 | 1048.8 | 754.662      | 1123.81     | 1.49       | 6.965891765 |
| 1450847_at   | Ncbp2         | 822.25   | 757.02 | 857.97 | 834.61 | 804.95  | 1033.2  | 1312.5 | 1292.2 | 1214.3 | 815.36       | 1213.0825   | 1.49       | 4.172804729 |
| 1426265_x_at | Dlat          | 473.28   | 485.78 | 451.34 | 541.04 | 422.92  | 703.23  | 601.54 | 813.1  | 696.64 | 474.872      | 703.6275    | 1.48       | 6.965891765 |
| 1459900_at   | C79468        | 411.96   | 410.97 | 409.33 | 506.19 | 407.76  | 778.39  | 589.17 | 551.23 | 602.65 | 429.242      | 630.36      | 1.47       | 11.91840305 |
| 1438922_x_at | Slc25a5       | 1698.2   | 1137.6 | 1291.3 | 1191.7 | 1360.43 | 1946    | 1728.3 | 2123.4 | 1982.4 | 1335.826     | 1945.0175   | 1.46       | 8.766902243 |
| 1460495_s_at | Htra2         | 1266.5   | 1420.3 | 1329.4 | 1112.3 | 1128.33 | 1971.6  | 1891.5 | 1797.9 | 1610   | 1251.372     | 1817.7275   | 1.45       | 4.297366064 |
| 1448914_a_at | Csf1          | 71.07    | 75.3   | 71.64  | 78.32  | 69.7    | 115.95  | 107.58 | 96.24  | 101.8  | 73.206       | 105.3925    | 1.44       | 3.427661027 |
| 1448302_at   | Kctd20        | 1313.1   | 970.61 | 1067.2 | 1015.2 | 902.28  | 1697.9  | 1416.7 | 1380.4 | 1531.5 | 1053.68      | 1506.6225   | 1.43       | 9.641274853 |
| 1418437_a_at | Mlx           | 389.48   | 400.98 | 475.56 | 410.61 | 410.35  | 526.62  | 542.17 | 710.2  | 602.23 | 417.396      | 595.305     | 1.43       | 10.42419758 |
| 1424571_at   | Ddx46         | 284.29   | 346.45 | 418.56 | 355.2  | 390.69  | 446.51  | 513.78 | 525.63 | 548.71 | 359.038      | 508.6575    | 1.42       | 8.766902243 |
| 1439262_x_at | 2310001A20Rik | 171.55   | 134.72 | 141.3  | 130.62 | 125.89  | 189.51  | 215.79 | 190.47 | 200.97 | 140.816      | 199.185     | 1.41       | 6.337939258 |
| 1428518_at   | Mlf1ip        | 657.3    | 770.11 | 628.64 | 953.67 | 644.05  | 1030.1  | 974.99 | 1018.2 | 1095.4 | 730.754      | 1029.66     | 1.41       | 11.91840305 |
| 1429092_at   | Vkorc111      | 318.33   | 258.62 | 371.3  | 310.49 | 244.6   | 409.67  | 395.19 | 459.2  | 428.15 | 300.668      | 423.0525    | 1.41       | 10.42419758 |
| 1436788_at   | Acp2          | 157.98   | 175.91 | 162.14 | 118.37 | 127.28  | 208.13  | 209.41 | 204.01 | 210.98 | 148.336      | 208.1325    | 1.40       | 8.766902243 |
| 1448610_a_at | Sod2          | 4504.7   | 3400.1 | 3552.4 | 3240.4 | 3105.2  | 5063.9  | 5552.2 | 4692   | 4643.8 | 3560.564     | 4987.985    | 1.40       | 10.42419758 |
| 1423333_at   | Ergic1        | 351.66   | 420.56 | 416.45 | 431.89 | 401.29  | 623.8   | 536.73 | 531.56 | 570.65 | 404.37       | 565.685     | 1.40       | 4.172804729 |
| 1420977_at   | Man1a2        | 317.61   | 348.34 | 320.44 | 392.43 | 295.7   | 524.03  | 477.14 | 410.69 | 458.56 | 334.904      | 467.605     | 1.40       | 8.766902243 |
| 1425011_x_at | Stx18         | 1029.7   | 889.99 | 1030.3 | 869.99 | 979.3   | 1293.9  | 1122.5 | 1487.1 | 1439.9 | 959.848      | 1335.82     | 1.39       | 8.766902243 |
| 1452839_at   | Dph5          | 456.35   | 566.92 | 632.7  | 559.7  | 670.34  | 819.18  | 896.87 | 713.61 | 779.57 | 577.202      | 802.3075    | 1.39       | 10.58793513 |
| 1451368_at   | Alg1          | 527.71   | 491.87 | 378.25 | 405.21 | 369.34  | 582.6   | 622.69 | 633.38 | 557.94 | 434.476      | 599.1525    | 1.38       | 10.58793513 |
| 1419363_a_at | Mrpl35        | 1285.1   | 1484.5 | 1477.3 | 1201.1 | 1293.23 | 1617.7  | 1871.4 | 1911   | 1945.9 | 1348.244     | 1836.475    | 1.36       | 6.965891765 |
| 1459522_s_at | Gyg           | 6707.5   | 8031.6 | 7435.5 | 8322.5 | 6793.76 | 11159   | 8358.9 | 10457  | 10533  | 7458.164     | 10126.8475  | 1.36       | 11.91840305 |
| 1448583_at   | AA960436      | 555.73   | 449.95 | 466.11 | 469.19 | 530.51  | 675.18  | 655.95 | 685.35 | 659.7  | 494.298      | 669.045     | 1.35       | 3.427661027 |
| 1436732_s_at | Fbxw8         | 794.78   | 938.67 | 971.91 | 1032.9 | 989.81  | 1158.6  | 1366.8 | 1199.8 | 1384.2 | 945.616      | 1277.3375   | 1.35       | 8.48555108  |
| 1438769_a_at | Thyn1         | 608.66   | 620.64 | 526.58 | 787.53 | 597.24  | 885.14  | 793.23 | 807.63 | 905.53 | 628.13       | 847.8825    | 1.35       | 12.10755341 |
| 1456520_at   | Zfp652        | 194.06   | 214.43 | 228.69 | 183.44 | 209.84  | 257.48  | 294.95 | 304.83 | 249.54 | 206.092      | 276.7       | 1.34       | 8.766902243 |
| 1442465_s_at | Strbp         | 610.28   | 557.22 | 622.39 | 674.44 | 607.75  | 695.26  | 879.62 | 837.08 | 887.23 | 614.416      | 824.7975    | 1.34       | 8.766902243 |

Table S2. Pbx1-regulated genes in CMPs

**Genes up-regulated in the absence of Pbx1**

| Probe Set    | Gene Symbol   | Controls |        |        |        |         | Mutants |        |        |        | Average Cont | Average Mut | Fold Diff. | q-value(%)  |
|--------------|---------------|----------|--------|--------|--------|---------|---------|--------|--------|--------|--------------|-------------|------------|-------------|
|              |               | CMP3     | CMP4   | CMP6   | CMP8   | CMP10   | CMP1    | CMP2   | CMP5   | CMP7   |              |             |            |             |
| 1423060_at   | <b>Pa2g4</b>  | 3341.2   | 3378.9 | 3759.7 | 3915.9 | 3408.89 | 5185    | 3920.1 | 5115.6 | 4869.6 | 3560.93      | 4772.5725   | 1.34       | 10.58793513 |
| 1454996_at   | Hsd11         | 1535.3   | 1412.2 | 1460.3 | 1085.5 | 1318.73 | 1782.9  | 1721.4 | 1878   | 1916.2 | 1362.41      | 1824.62     | 1.34       | 8.48555108  |
| 1420013_s_at | Lss           | 216.91   | 255.52 | 247.83 | 261.46 | 276.47  | 342.51  | 378.89 | 324.7  | 298.26 | 251.638      | 336.09      | 1.34       | 8.766902243 |
| 1433646_at   | Mrps27        | 511.22   | 501.23 | 514.33 | 588.74 | 623.45  | 675.66  | 811.29 | 740.16 | 683.53 | 547.794      | 727.66      | 1.33       | 8.766902243 |
| 1453048_at   | Nhlrc2        | 336.39   | 350.02 | 414.2  | 350.22 | 378.59  | 474.3   | 536.6  | 452.08 | 426.33 | 365.884      | 472.3275    | 1.29       | 11.91840305 |
| 1424904_at   | 1300010F03Rik | 190.58   | 200.8  | 207.67 | 206.49 | 189.34  | 254.87  | 223.12 | 252.42 | 293.06 | 198.976      | 255.8675    | 1.29       | 10.42419758 |
| 1452579_at   | Iscu          | 1371     | 1445.4 | 1177.9 | 1256.8 | 1370.03 | 1592.2  | 1614   | 1789.7 | 1731.8 | 1324.222     | 1681.9275   | 1.27       | 6.965891765 |
| 1417287_at   | H13           | 3157.2   | 3577.2 | 3788.2 | 3245.4 | 3070.5  | 4415.9  | 4253.3 | 4257.7 | 4041.5 | 3367.71      | 4242.0825   | 1.26       | 6.965891765 |
| 1448517_at   | Timm22        | 880.47   | 917.68 | 799.81 | 703.73 | 908.85  | 1063.8  | 999.98 | 1101.3 | 1067.7 | 842.108      | 1058.1825   | 1.26       | 10.42419758 |
| 1455420_at   | Rad23b        | 162.68   | 152.99 | 178.31 | 165.42 | 140.04  | 194.86  | 211.78 | 190.35 | 206.36 | 159.888      | 200.8375    | 1.26       | 8.48555108  |
| 1448488_at   | Mrps5         | 566.52   | 628.74 | 540.78 | 574.24 | 578.91  | 709.42  | 808.9  | 734.04 | 643.37 | 577.838      | 723.9325    | 1.25       | 10.42419758 |

Table S2. Pbx1-regulated genes in CMPs

## Genes down-regulated in the absence of Pbx1

| Probe Set    | Gene Symbol       | Controls |        |        |        |         | Mutants |        |        |        | Average Cont | Average Mut | Fold Diff. | q-value(%)  |
|--------------|-------------------|----------|--------|--------|--------|---------|---------|--------|--------|--------|--------------|-------------|------------|-------------|
|              |                   | CMP3     | CMP4   | CMP6   | CMP8   | CMP10   | CMP1    | CMP2   | CMP5   | CMP7   |              |             |            |             |
| 1449757_x_at | Dntt              | 627.99   | 338.64 | 406.35 | 847.91 | 917.21  | 60      | 60     | 60     | 60     | 627.62       | 60          | 10.46      | 8.097849177 |
| 1417155_at   | Mycn              | 328.18   | 583.72 | 448.81 | 298.64 | 704.17  | 60      | 136.18 | 65.67  | 60     | 472.704      | 80.4625     | 5.87       | 7.270796118 |
| 1421461_at   | Mpl               | 1012     | 697.79 | 532.25 | 681.3  | 1002.57 | 107.9   | 348.62 | 149.41 | 120.78 | 785.176      | 181.6775    | 4.32       | 5.141491541 |
| 1428647_at   | Pbx1              | 3159.8   | 4136.2 | 1799.8 | 1769.1 | 2368.54 | 685.73  | 672.49 | 470.15 | 719.46 | 2646.694     | 636.9575    | 4.16       | 10.52884906 |
| 1448995_at   | Pf4               | 18559    | 15072  | 9858.7 | 11817  | 11545.6 | 4218.8  | 9788.1 | 727.14 | 194.88 | 13370.504    | 3732.235    | 3.58       | 10.58793513 |
| 1448748_at   | Plek              | 3085.7   | 3762.7 | 2379.7 | 2379.2 | 3005.51 | 560.94  | 1316.4 | 727.7  | 665.95 | 2922.574     | 817.7375    | 3.57       | 3.69132726  |
| 1424588_at   | Srgap3            | 336.91   | 399.08 | 229.22 | 332.88 | 240.39  | 118.87  | 60     | 93.24  | 76.48  | 307.696      | 87.1475     | 3.53       | 4.265533723 |
| 1439066_at   | Angpt1            | 1544.6   | 1897.2 | 1159.5 | 1495   | 1876.31 | 352.44  | 750.07 | 332.06 | 386.58 | 1594.514     | 455.2875    | 3.50       | 3.69132726  |
| 1437667_a_at | Bach2             | 234.76   | 255.25 | 184.96 | 278.81 | 201.62  | 71.32   | 80.82  | 60     | 60     | 231.08       | 68.035      | 3.40       | 0           |
| 1423213_at   | Plxnc1            | 1726     | 2028.4 | 1605.8 | 1088.5 | 1323.44 | 355.72  | 733.83 | 334.39 | 426.13 | 1554.42      | 462.5175    | 3.36       | 5.141491541 |
| 1425503_at   | Gcnt2             | 409.95   | 532.76 | 464.94 | 678.45 | 731.77  | 195.69  | 172.86 | 173.57 | 158.89 | 563.574      | 175.2525    | 3.22       | 5.141491541 |
| 1449988_at   | Gimap1            | 291.04   | 314.19 | 242.41 | 127.32 | 249.78  | 81.22   | 112.47 | 60.63  | 60     | 244.948      | 78.58       | 3.12       | 8.097849177 |
| 1450992_a_at | Meis1             | 1131     | 1129   | 954.09 | 689.23 | 989.26  | 404.98  | 550.33 | 237.25 | 207.9  | 978.528      | 350.115     | 2.79       | 5.141491541 |
| 1424852_at   | Mef2c             | 4256     | 5658.5 | 4329.7 | 3459   | 5660.12 | 1780.9  | 981.61 | 1877.9 | 2160.3 | 4672.662     | 1700.1875   | 2.75       | 5.141491541 |
| 1433485_x_at | Gpr56             | 3245     | 5970.6 | 5119.9 | 3676.1 | 5292.57 | 1851.6  | 2218.8 | 1443.7 | 1299.7 | 4660.832     | 1703.4575   | 2.74       | 6.061547922 |
| 1424923_at   | Serpina3g         | 6916.9   | 4386.3 | 4632.4 | 4793.4 | 5275.87 | 2336.7  | 2790.4 | 1165.5 | 1353.7 | 5200.964     | 1911.57     | 2.72       | 5.141491541 |
| 1419538_at   | Flt3              | 2276.5   | 1964.5 | 2318.3 | 3822   | 3114.83 | 954.56  | 1174   | 1040.5 | 891.04 | 2699.242     | 1015.0025   | 2.66       | 8.097849177 |
| 1447584_s_at | Myct1             | 279.17   | 164.07 | 190.12 | 202.41 | 190.98  | 60      | 131.95 | 60     | 60     | 205.35       | 77.9875     | 2.63       | 6.337939258 |
| 1437308_s_at | F2r               | 16274    | 15397  | 12740  | 14415  | 15133.6 | 7051.7  | 13001  | 2487.1 | 921.21 | 14792.02     | 5865.1425   | 2.52       | 11.91840305 |
| 1419722_at   | Klk8              | 1091.9   | 708.7  | 632.87 | 710.35 | 736.04  | 234.9   | 381.89 | 276.78 | 343.13 | 775.976      | 309.175     | 2.51       | 6.061547922 |
| 1435144_at   | ---               | 820.76   | 912.94 | 579.14 | 466.18 | 723.2   | 204.14  | 486.34 | 155.34 | 271.87 | 700.444      | 279.4225    | 2.51       | 10.52884906 |
| 1428650_at   | Tns1              | 455.86   | 643.77 | 448.28 | 643.23 | 888.03  | 198.78  | 342.51 | 203.89 | 249.41 | 615.834      | 248.6475    | 2.48       | 10.52884906 |
| 1446484_at   | ---               | 431.69   | 375.66 | 227.81 | 507.53 | 514.47  | 226.05  | 70.2   | 169.52 | 205.9  | 411.432      | 167.9175    | 2.45       | 11.91840305 |
| 1425742_a_at | Tsc22d1           | 2989.6   | 3056.3 | 1591.4 | 2072.9 | 2404.79 | 747.78  | 1679.9 | 623.67 | 905.61 | 2422.974     | 989.2275    | 2.45       | 10.52884906 |
| 1433883_at   | Tpm4              | 2218.5   | 2463.8 | 2814.4 | 2589.1 | 3072.96 | 998.56  | 612.43 | 1085.8 | 1634.5 | 2631.734     | 1082.82     | 2.43       | 3.69132726  |
| 1417558_at   | Fyn               | 1256.7   | 1144.8 | 777.61 | 1057.5 | 1253.96 | 489.88  | 673.05 | 305.96 | 352.36 | 1098.114     | 455.3125    | 2.41       | 5.141491541 |
| 1457052_at   | Kcng1             | 397      | 241.36 | 238.21 | 336.98 | 367.95  | 119.24  | 193.37 | 130.01 | 84.66  | 316.3        | 131.82      | 2.40       | 7.270796118 |
| 1460719_a_at | P2rx1             | 193.12   | 255.05 | 277.53 | 129    | 231.94  | 65.49   | 106.79 | 109.17 | 81.12  | 217.328      | 90.6425     | 2.40       | 8.771863704 |
| 1428510_at   | Lphn1             | 418.31   | 458.67 | 330.31 | 655.57 | 585.63  | 181.96  | 252.19 | 176.28 | 211.53 | 489.698      | 205.49      | 2.38       | 8.48555108  |
| 1421118_a_at | Gpr56             | 2287.9   | 2499.4 | 3433.1 | 2327.9 | 3052.77 | 1168.7  | 1655.4 | 1043.7 | 709.91 | 2720.196     | 1144.425    | 2.38       | 5.141491541 |
| 1423350_at   | Socs5             | 429.64   | 332.56 | 336.37 | 340.21 | 338.96  | 202.24  | 90.63  | 219.17 | 88.7   | 355.548      | 150.185     | 2.37       | 5.141491541 |
| 1455161_at   | AI504432          | 2678.1   | 1659.9 | 1312.7 | 1784.8 | 1774.93 | 901.12  | 1029.8 | 517.56 | 669.64 | 1842.076     | 779.525     | 2.36       | 10.52884906 |
| 1425506_at   | Mylk              | 220.57   | 346.67 | 221.18 | 271.83 | 265.14  | 124.12  | 98.36  | 96.22  | 131.42 | 265.078      | 112.53      | 2.36       | 5.141491541 |
| 1428572_at   | Basp1 /// LOC1000 | 1014.6   | 484.83 | 958.82 | 805.38 | 831.04  | 332.15  | 296.19 | 306.51 | 461.94 | 818.942      | 349.1975    | 2.35       | 8.097849177 |
| 1456064_at   | AI504432          | 592.76   | 637.59 | 733.37 | 419.67 | 841.25  | 313.81  | 298.61 | 237.81 | 251.02 | 644.928      | 275.3125    | 2.34       | 7.013521794 |
| 1456634_at   | 9830001H06Rik     | 260.9    | 253.75 | 208.75 | 185.75 | 117.1   | 74.23   | 132.09 | 89.18  | 60     | 205.25       | 88.875      | 2.31       | 12.10755341 |
| 1437122_at   | Bcl2              | 332.82   | 471.36 | 378.62 | 202.66 | 406.55  | 199.05  | 168.85 | 142.77 | 111.27 | 358.402      | 155.485     | 2.31       | 10.52884906 |

Table S2. Pbx1-regulated genes in CMPs

## Genes down-regulated in the absence of Pbx1

| Probe Set    | Gene Symbol      | Controls |        |        |        |         | Mutants |        |        |        | Average Cont | Average Mut | Fold Diff. | q-value(%)  |
|--------------|------------------|----------|--------|--------|--------|---------|---------|--------|--------|--------|--------------|-------------|------------|-------------|
|              |                  | CMP3     | CMP4   | CMP6   | CMP8   | CMP10   | CMP1    | CMP2   | CMP5   | CMP7   |              |             |            |             |
| 1421937_at   | Dapp1            | 3057.5   | 1956.7 | 1918.7 | 2243.5 | 2511.26 | 1162.9  | 1071.8 | 965.06 | 902.63 | 2337.518     | 1025.6025   | 2.28       | 5.141491541 |
| 1427819_at   | ---              | 463.87   | 345.25 | 229.74 | 330.22 | 278.49  | 207.51  | 114.69 | 156.67 | 103.77 | 329.514      | 145.66      | 2.26       | 10.58793513 |
| 1456795_at   | D330027G24Rik    | 93.6     | 186.65 | 177.37 | 122.62 | 186.26  | 77.62   | 60     | 65.71  | 71.61  | 153.3        | 68.735      | 2.23       | 10.52884906 |
| 1435083_at   | Ctxn1            | 151.79   | 157.3  | 135.86 | 241.99 | 239.98  | 104.43  | 76.29  | 71.77  | 80.04  | 185.384      | 83.1325     | 2.23       | 10.52884906 |
| 1451506_at   | Mef2c            | 1460.2   | 968.22 | 834.52 | 841.17 | 1305.25 | 352.18  | 438.79 | 509.03 | 663.24 | 1081.872     | 490.81      | 2.20       | 10.52884906 |
| 1415995_at   | Casp6            | 554.89   | 703.03 | 590.88 | 548.17 | 593.13  | 254.64  | 255.5  | 280.92 | 301.4  | 598.02       | 273.115     | 2.19       | 0           |
| 1460555_at   | Fam65b           | 1527.3   | 1645.1 | 1669.1 | 1081.8 | 1579.74 | 666.46  | 641.49 | 680.91 | 762.82 | 1500.624     | 687.92      | 2.18       | 3.69132726  |
| 1435745_at   | 5031439G07Rik    | 1263.7   | 1129.1 | 1131.2 | 2079.3 | 1422.51 | 817.06  | 446.82 | 589.42 | 734.69 | 1405.136     | 646.9975    | 2.17       | 12.10755341 |
| 1443832_s_at | Sdpr             | 202.48   | 199.88 | 106.34 | 146.44 | 132.57  | 70.88   | 99.55  | 60     | 60     | 157.542      | 72.6075     | 2.17       | 10.58793513 |
| 1436515_at   | Bach2            | 231.37   | 304.17 | 264.46 | 423.11 | 300.34  | 159.22  | 203.95 | 97.54  | 102.31 | 304.69       | 140.755     | 2.16       | 10.52884906 |
| 1452823_at   | Gstk1            | 335.3    | 264.82 | 204.39 | 209.48 | 181.92  | 99.21   | 119.32 | 116.6  | 107.4  | 239.182      | 110.6325    | 2.16       | 8.771863704 |
| 1425517_s_at | Ogt              | 354.06   | 251.71 | 436.5  | 248.26 | 298.11  | 140.83  | 91.13  | 199.69 | 160.1  | 317.728      | 147.9375    | 2.15       | 10.52884906 |
| 1428479_at   | Nfatc1           | 828.82   | 547.68 | 674.55 | 678.18 | 881.58  | 297.19  | 184.47 | 368.31 | 527.55 | 722.162      | 344.38      | 2.10       | 8.771863704 |
| 1433719_at   | Slc9a9           | 141.28   | 177.97 | 184.22 | 174.41 | 148.28  | 74.32   | 60     | 77.8   | 103.61 | 165.232      | 78.9325     | 2.09       | 3.69132726  |
| 1433939_at   | Aff3             | 3695.9   | 3448.5 | 3744.8 | 3997.2 | 3782.44 | 2097.1  | 2555   | 1267.7 | 1270.1 | 3733.764     | 1797.48     | 2.08       | 3.69132726  |
| 1418741_at   | Itgb7            | 1046.4   | 777.41 | 969.62 | 1070   | 1124.3  | 429.39  | 748.12 | 330.83 | 416.27 | 997.538      | 481.1525    | 2.07       | 6.061547922 |
| 1426397_at   | Tgfb2            | 671.95   | 1253.6 | 709.53 | 762.82 | 890.49  | 406.67  | 470.26 | 347.15 | 443.66 | 857.684      | 416.935     | 2.06       | 11.91840305 |
| 1427918_a_at | Rhoq             | 369.59   | 282.04 | 359.27 | 418.3  | 362.49  | 263.34  | 60.89  | 191.76 | 180.81 | 358.338      | 174.2       | 2.06       | 8.771863704 |
| 1436836_x_at | Cnn3 /// LOC1000 | 5287.8   | 4899.3 | 7564.8 | 8115.8 | 7858.96 | 2679.4  | 2338.9 | 4279.8 | 3904.9 | 6745.336     | 3300.74     | 2.04       | 10.52884906 |
| 1435195_at   | Vash1            | 484.56   | 510.21 | 343.6  | 497.08 | 406.82  | 242.19  | 297.13 | 147.27 | 197.02 | 448.454      | 220.9025    | 2.03       | 5.645559339 |
| 1416257_at   | Capn2            | 472.61   | 277.76 | 327.31 | 321.98 | 359.18  | 170.46  | 162.33 | 153.68 | 207.14 | 351.768      | 173.4025    | 2.03       | 6.965891765 |
| 1427185_at   | Mef2a            | 392.58   | 505.55 | 564.64 | 506.74 | 555.01  | 160.31  | 124.92 | 343.63 | 374.88 | 504.904      | 250.935     | 2.01       | 10.52884906 |
| 1416872_at   | Tspan6           | 196.32   | 271.25 | 257.75 | 199.5  | 290.8   | 74.13   | 174.72 | 131.19 | 105.22 | 243.124      | 121.315     | 2.00       | 8.48555108  |
| 1449856_at   | Rgs18            | 1942     | 2151.9 | 1913.6 | 1005.7 | 1800.29 | 791.08  | 858.36 | 938.76 | 933.2  | 1762.69      | 880.35      | 2.00       | 10.52884906 |
| 1436181_at   | Ddef2            | 213.23   | 293.11 | 174.56 | 216.88 | 185.73  | 104.16  | 82.84  | 118.45 | 127.51 | 216.702      | 108.24      | 2.00       | 8.097849177 |
| 1421891_at   | St3gal2          | 235.18   | 203.51 | 257.49 | 150.81 | 218.38  | 106.66  | 119.42 | 117.59 | 82.1   | 213.074      | 106.4425    | 2.00       | 5.645559339 |
| 1428577_at   | Ppfia4           | 243.2    | 211.7  | 234.03 | 193.95 | 267.87  | 96.37   | 69.39  | 132.74 | 163.15 | 230.15       | 115.4125    | 1.99       | 5.645559339 |
| 1433501_at   | Ctso             | 838.47   | 620.69 | 560.3  | 431.3  | 577.75  | 295.35  | 282.73 | 341.18 | 296.32 | 605.702      | 303.895     | 1.99       | 9.641274853 |
| 1419222_at   | Tbxa2r           | 141.39   | 172.87 | 139.22 | 245.78 | 229.24  | 96.56   | 95.25  | 82.37  | 99.31  | 185.7        | 93.3725     | 1.99       | 11.91840305 |
| 1448398_s_at | Rpl22            | 3242.2   | 3087   | 2741.6 | 2492.7 | 3277.98 | 1182.5  | 1600.5 | 1360.5 | 1852.8 | 2968.298     | 1499.0875   | 1.98       | 3.69132726  |
| 1448960_at   | Cxxc5            | 1650.9   | 1152   | 1145.3 | 1720.1 | 1882.88 | 754.23  | 903.35 | 766.14 | 653.66 | 1510.224     | 769.345     | 1.96       | 8.771863704 |
| 1437421_at   | ---              | 174.02   | 194.4  | 204.37 | 117.78 | 171.24  | 71.82   | 60     | 107.55 | 112.11 | 172.362      | 87.87       | 1.96       | 8.771863704 |
| 1453261_at   | 2610035D17Rik    | 153.43   | 129.94 | 114.62 | 195.87 | 143.22  | 71.64   | 88.2   | 60     | 81.19  | 147.416      | 75.2575     | 1.96       | 8.097849177 |
| 1451427_a_at | Egfl7            | 751.09   | 693.74 | 800.99 | 1033.6 | 1198.39 | 344.47  | 630.04 | 413.15 | 448.16 | 895.568      | 458.955     | 1.95       | 11.91840305 |
| 1445895_at   | ---              | 182.89   | 163.37 | 135.13 | 134.2  | 106.27  | 62.39   | 86.92  | 60     | 86.8   | 144.372      | 74.0275     | 1.95       | 8.097849177 |
| 1424455_at   | Gprasp1          | 428.13   | 487.33 | 367.29 | 667.99 | 424.98  | 258.42  | 168.73 | 268.99 | 286.94 | 475.144      | 245.77      | 1.93       | 11.91840305 |
| 1422737_at   | Ncoa3            | 221.42   | 245.19 | 214.63 | 245.48 | 215.42  | 106.51  | 60     | 155.58 | 153.66 | 228.428      | 118.9375    | 1.92       | 5.141491541 |

Table S2. Pbx1-regulated genes in CMPs

## Genes down-regulated in the absence of Pbx1

| Probe Set    | Gene Symbol | Controls |        |        |        |         | Mutants |        |        |        | Average Cont | Average Mut | Fold Diff. | q-value(%)  |
|--------------|-------------|----------|--------|--------|--------|---------|---------|--------|--------|--------|--------------|-------------|------------|-------------|
|              |             | CMP3     | CMP4   | CMP6   | CMP8   | CMP10   | CMP1    | CMP2   | CMP5   | CMP7   |              |             |            |             |
| 1433695_at   | Cnrip1      | 209.54   | 120.15 | 186.47 | 128.91 | 188.78  | 60      | 106.08 | 95.48  | 86.09  | 166.77       | 86.9125     | 1.92       | 11.91840305 |
| 1416683_at   | Plxnb2      | 545.39   | 422.99 | 535.75 | 669.08 | 785.85  | 315.07  | 236.17 | 288.88 | 398.3  | 591.812      | 309.605     | 1.91       | 10.58793513 |
| 1418004_a_at | Tmem176b    | 5678.3   | 8145.4 | 7039.6 | 5935.8 | 8095.12 | 4916.8  | 3138.8 | 2930.6 | 3621.5 | 6978.846     | 3651.9175   | 1.91       | 6.337939258 |
| 1433711_s_at | Sesn1       | 2369.2   | 3057.2 | 3251.4 | 3437.1 | 3532.3  | 1558.3  | 1447.5 | 1627   | 1927.6 | 3129.426     | 1640.085    | 1.91       | 3.69132726  |
| 1454899_at   | Lpp         | 220.93   | 155.88 | 171.01 | 127.74 | 203.52  | 94.58   | 71.24  | 99.63  | 105.09 | 175.816      | 92.635      | 1.90       | 8.771863704 |
| 1417240_at   | Zyx         | 2543.6   | 3054.6 | 2327.6 | 2486.1 | 3028.86 | 1334.5  | 1901   | 1056.7 | 1393   | 2688.138     | 1421.295    | 1.89       | 5.141491541 |
| 1458370_at   | Bmp2k       | 513.01   | 630.55 | 437.4  | 453.53 | 409.42  | 257.88  | 190.71 | 338.3  | 253.11 | 488.782      | 260         | 1.88       | 7.270796118 |
| 1454727_at   | Afap111     | 901.38   | 1019.5 | 1123.6 | 1054.2 | 1165.11 | 515.79  | 550.29 | 616.32 | 566.47 | 1052.768     | 562.2175    | 1.87       | 0           |
| 1454971_x_at | Tsc22d1     | 8484.7   | 8045.7 | 5477.1 | 8323.2 | 7767.3  | 3887.8  | 6377.7 | 2105.2 | 4114.6 | 7619.582     | 4121.3125   | 1.85       | 12.10755341 |
| 1424704_at   | Runx2       | 2326.6   | 2833.8 | 3081.1 | 3102.4 | 3453.66 | 1741.2  | 1047.3 | 1772.8 | 1843.3 | 2959.524     | 1601.145    | 1.85       | 5.141491541 |
| 1434457_at   | Sp100       | 282.46   | 191.62 | 214.15 | 200.02 | 232.01  | 123.95  | 87.71  | 136.78 | 142.57 | 224.052      | 122.7525    | 1.83       | 6.061547922 |
| 1422474_at   | Pde4b       | 195.87   | 205.57 | 240.95 | 218.54 | 284.05  | 114.1   | 124.86 | 133.5  | 129.68 | 228.996      | 125.535     | 1.82       | 4.265533723 |
| 1422527_at   | H2-DMA      | 3286.5   | 2793.4 | 2695.1 | 2806.3 | 2727.65 | 1987.1  | 1922.5 | 908.51 | 1507.4 | 2861.774     | 1581.365    | 1.81       | 5.141491541 |
| 1449303_at   | Sesn3       | 293.03   | 215.86 | 213.75 | 216.06 | 222.46  | 135.18  | 103.38 | 126.34 | 150.22 | 232.232      | 128.78      | 1.80       | 5.141491541 |
| 1417218_at   | Calhm2      | 369.7    | 342.41 | 335.69 | 266.76 | 294.02  | 188.81  | 213.23 | 159.78 | 154.5  | 321.716      | 179.08      | 1.80       | 3.69132726  |
| 1416007_at   | Satb1       | 963.87   | 1098.2 | 723.31 | 1031.3 | 818.22  | 706.97  | 574.75 | 368.68 | 415.67 | 926.984      | 516.5175    | 1.79       | 9.641274853 |
| 1457687_at   | Bcl2        | 3234.2   | 3534.6 | 3858.8 | 4517.7 | 4654.02 | 2578.2  | 1644.1 | 2240.8 | 2408.3 | 3959.862     | 2217.8475   | 1.79       | 6.061547922 |
| 1417336_a_at | Syt14       | 177.62   | 160.35 | 157.05 | 124.37 | 182.44  | 67.49   | 106.54 | 110.94 | 77.05  | 160.366      | 90.505      | 1.77       | 6.337939258 |
| 1438999_a_at | Nfat5       | 116.38   | 189.64 | 161.05 | 134.91 | 148.89  | 110.47  | 60     | 93.22  | 75.8   | 150.174      | 84.8725     | 1.77       | 10.52884906 |
| 1434058_at   | Mtmr12      | 462.94   | 406.15 | 424.22 | 348.69 | 411.04  | 225.5   | 121.05 | 290.75 | 292.67 | 410.608      | 232.4925    | 1.77       | 8.097849177 |
| 1440226_at   | Zfp760      | 340.47   | 429.88 | 411.78 | 333.22 | 409.17  | 200.82  | 204.87 | 240.8  | 229.23 | 384.904      | 218.93      | 1.76       | 3.69132726  |
| 1448892_at   | Dock7       | 341.75   | 340.42 | 371.56 | 230.42 | 268.4   | 122.41  | 174.14 | 183.84 | 233.34 | 310.51       | 178.4325    | 1.74       | 11.91840305 |
| 1415850_at   | Rasa3       | 1425.1   | 2044   | 1989.9 | 1320.7 | 1987.52 | 1086.9  | 943.88 | 963.87 | 1076.4 | 1753.446     | 1017.7575   | 1.72       | 8.771863704 |
| 1433546_at   | Gns         | 423.35   | 414.78 | 423.35 | 335.42 | 424.56  | 198.9   | 292.3  | 227.54 | 221.33 | 404.292      | 235.0175    | 1.72       | 3.69132726  |
| 1428517_at   | Wdfy3       | 477.25   | 346.73 | 460.58 | 285.57 | 364.53  | 202.16  | 219.48 | 209.4  | 268.94 | 386.932      | 224.995     | 1.72       | 10.52884906 |
| 1455481_at   | lds         | 620.44   | 470.52 | 619.96 | 587.34 | 651.04  | 300.78  | 243.99 | 399.44 | 429.92 | 589.86       | 343.5325    | 1.72       | 6.337939258 |
| 1420756_at   | Fut7        | 700.84   | 637.18 | 639.43 | 660.6  | 785.57  | 449.79  | 389.73 | 331.02 | 432.43 | 684.724      | 400.7425    | 1.71       | 3.69132726  |
| 1418634_at   | Notch1      | 2443.2   | 3074.7 | 3111.5 | 3236.5 | 4222.97 | 2153.6  | 1402   | 1750   | 2231.2 | 3217.77      | 1884.17     | 1.71       | 11.91840305 |
| 1452746_at   | Atp13a2     | 2486.6   | 2552.2 | 3191.1 | 3232   | 3522.35 | 1669.8  | 1905.8 | 1510   | 1949.3 | 2996.856     | 1758.73     | 1.70       | 5.645559339 |
| 1434063_at   | Zfp664      | 421.07   | 443.21 | 527.97 | 354.57 | 505.01  | 253.5   | 316.4  | 304.74 | 193.25 | 450.366      | 266.9725    | 1.69       | 8.097849177 |
| 1437111_at   | Zc3h12c     | 234.35   | 254.45 | 231.46 | 277.02 | 244.1   | 126.24  | 88.17  | 175.25 | 199.63 | 248.276      | 147.3225    | 1.69       | 8.48555108  |
| 1448775_at   | Ifi203      | 2722.3   | 2728.7 | 2913.9 | 3947.9 | 3464.96 | 2022.8  | 1721   | 1690.5 | 2086.6 | 3155.54      | 1880.2475   | 1.68       | 7.270796118 |
| 1434576_at   | Tsga14      | 238.21   | 350.92 | 371.27 | 253.16 | 295.12  | 193.82  | 149.46 | 190.26 | 185.65 | 301.736      | 179.7975    | 1.68       | 10.52884906 |
| 1434179_at   | Mll3        | 448.88   | 640.39 | 578.3  | 438.45 | 531.98  | 338.58  | 340.86 | 324.01 | 254.18 | 527.6        | 314.4075    | 1.68       | 7.013521794 |
| 1418181_at   | Ptp4a3      | 1611.4   | 2019   | 1963.8 | 1736.7 | 2489.32 | 1126.4  | 1531   | 1132.5 | 902.24 | 1964.032     | 1173.0375   | 1.67       | 10.52884906 |
| 1417609_at   | Ube2a       | 505.31   | 556.53 | 494.28 | 373.23 | 424.43  | 255.21  | 275.69 | 324.58 | 275.44 | 470.756      | 282.73      | 1.67       | 6.061547922 |
| 1434359_at   | Fam65b      | 235.87   | 255.82 | 243.27 | 233.5  | 245.78  | 151.18  | 170.79 | 119.62 | 142.58 | 242.848      | 146.0425    | 1.66       | 0           |



Table S2. Pbx1-regulated genes in CMPs

## Genes down-regulated in the absence of Pbx1

| Probe Set    | Gene Symbol      | Controls |        |        |        |         | Mutants |        |        |        | Average Cont | Average Mut | Fold Diff. | q-value(%)  |
|--------------|------------------|----------|--------|--------|--------|---------|---------|--------|--------|--------|--------------|-------------|------------|-------------|
|              |                  | CMP3     | CMP4   | CMP6   | CMP8   | CMP10   | CMP1    | CMP2   | CMP5   | CMP7   |              |             |            |             |
| 1435564_at   | EG240055         | 122.46   | 161.89 | 155.54 | 147.45 | 143.71  | 94.6    | 75.85  | 90.75  | 90.9   | 146.21       | 88.025      | 1.66       | 3.69132726  |
| 1434036_at   | Mtss1            | 294.71   | 333.42 | 256.55 | 214.95 | 242.8   | 117.21  | 174.6  | 192.99 | 163.12 | 268.486      | 161.98      | 1.66       | 10.52884906 |
| 1433514_at   | Etnk1            | 2422.6   | 3889.8 | 3605.8 | 2659.5 | 3680.34 | 2059.4  | 1580.2 | 2294.8 | 1925.1 | 3251.61      | 1964.8725   | 1.65       | 12.10755341 |
| 1433668_at   | Pnrc1            | 1627.8   | 2153.4 | 1601.3 | 1463.6 | 1797.16 | 983.23  | 1292.8 | 849.4  | 1058.2 | 1728.644     | 1045.92     | 1.65       | 8.097849177 |
| 1452222_at   | Utrn             | 879.44   | 546.13 | 593.75 | 659.45 | 691.19  | 406.61  | 331.46 | 391.7  | 513.37 | 673.992      | 410.785     | 1.64       | 11.91840305 |
| 1434444_s_at | Anapc1           | 463.25   | 615.38 | 652.92 | 645.57 | 730.55  | 441.5   | 271.97 | 407.92 | 394.66 | 621.534      | 379.0125    | 1.64       | 8.771863704 |
| 1456380_x_at | Cnn3 /// LOC1000 | 442.73   | 310.04 | 405.55 | 514.47 | 454.06  | 206.31  | 212.52 | 304.53 | 321.42 | 425.37       | 261.195     | 1.63       | 12.71951321 |
| 1421963_a_at | Cdc25b           | 627.94   | 774.45 | 689.02 | 578.69 | 712.14  | 395.28  | 608.11 | 317.78 | 341.73 | 676.448      | 415.725     | 1.63       | 10.58793513 |
| 1428064_at   | Arap1            | 704.99   | 1013.7 | 874.72 | 835.95 | 809.43  | 650.98  | 446.58 | 496.54 | 500.01 | 847.762      | 523.5275    | 1.62       | 6.337939258 |
| 1437161_x_at | Rbpms            | 189.54   | 265.91 | 238.66 | 296.18 | 249.76  | 190.81  | 143.01 | 144.5  | 138.19 | 248.01       | 154.1275    | 1.61       | 8.771863704 |
| 1417791_a_at | Zfml             | 844      | 850.08 | 846.36 | 719.86 | 815.78  | 465.26  | 456.47 | 629.27 | 479.5  | 815.216      | 507.625     | 1.61       | 3.69132726  |
| 1451352_s_at | Mta3             | 897.26   | 780.64 | 1022.9 | 954.37 | 1169.69 | 524.13  | 759.03 | 608.3  | 514.84 | 964.98       | 601.575     | 1.60       | 8.771863704 |
| 1416844_at   | Prmt2            | 216.71   | 215.7  | 175.26 | 209.41 | 153.27  | 163.38  | 107.25 | 118.74 | 95.84  | 194.07       | 121.3025    | 1.60       | 10.58793513 |
| 1460728_s_at | Ing4             | 342.61   | 362.99 | 418.7  | 259.85 | 312.54  | 223.09  | 213.72 | 203.41 | 208.69 | 339.338      | 212.2275    | 1.60       | 8.48555108  |
| 1453360_a_at | Tex9             | 153.72   | 153.48 | 197.96 | 131.49 | 183.72  | 84.86   | 95.54  | 125.42 | 106.88 | 164.074      | 103.175     | 1.59       | 10.52884906 |
| 1436067_at   | Zbtb10           | 158.47   | 116.99 | 137.9  | 173.87 | 156.58  | 60      | 109    | 104.86 | 100.7  | 148.762      | 93.64       | 1.59       | 10.58793513 |
| 1445546_at   | A1844685         | 208.51   | 175.5  | 203.16 | 177.35 | 162.96  | 123.42  | 118.43 | 118.57 | 112.19 | 185.496      | 118.1525    | 1.57       | 3.69132726  |
| 1428789_at   | Ralgps2          | 1376.5   | 1148.4 | 1102.5 | 1688.7 | 1402.59 | 924.26  | 807.19 | 711.9  | 997.37 | 1343.736     | 860.18      | 1.56       | 10.58793513 |
| 1452186_at   | Rbm5             | 3093.3   | 3421.9 | 4467.2 | 2891.5 | 3501.27 | 2571.4  | 1717.7 | 2457.6 | 2188.5 | 3475.04      | 2233.78     | 1.56       | 12.10755341 |
| 1433826_at   | Tsyp13           | 589.11   | 512.98 | 560.77 | 571.05 | 613.94  | 331.07  | 256.61 | 406    | 481.38 | 569.57       | 368.765     | 1.54       | 8.097849177 |
| 1423678_at   | BC017643         | 1276.5   | 1288.2 | 1217.6 | 922.71 | 1099.62 | 867.09  | 729.22 | 753.81 | 658.18 | 1160.928     | 752.075     | 1.54       | 6.337939258 |
| 1430127_a_at | Ccnd2            | 2637.3   | 2692.4 | 2087.7 | 2042   | 2575.04 | 1814.3  | 1724.7 | 1560.5 | 1141.9 | 2406.864     | 1560.355    | 1.54       | 8.771863704 |
| 1426832_at   | Ddx26b           | 1781.8   | 2201.4 | 1712.5 | 1757.8 | 1796.42 | 1507.9  | 1450.5 | 959.36 | 903.39 | 1849.96      | 1205.2725   | 1.53       | 10.58793513 |
| 1449404_at   | Pip4k2a          | 2146.6   | 1873.2 | 1731   | 2522.3 | 2059.08 | 1251    | 1540   | 1130.4 | 1502.4 | 2066.442     | 1355.935    | 1.52       | 8.771863704 |
| 1434027_at   | Rcan3            | 206.56   | 173.15 | 178.86 | 184.19 | 200.95  | 97.65   | 144.67 | 99.39  | 154    | 188.742      | 123.9275    | 1.52       | 8.097849177 |
| 1436161_at   | Pds5b            | 1394.3   | 1233.2 | 1312.1 | 1548.7 | 1333.23 | 1033.4  | 544.69 | 1071.6 | 939.45 | 1364.302     | 897.2875    | 1.52       | 10.52884906 |
| 1426662_at   | Cmas             | 2599.9   | 3352.9 | 2636.9 | 2661.4 | 2943.23 | 2163.9  | 1639.6 | 1776.6 | 1899.6 | 2838.86      | 1869.9425   | 1.52       | 5.141491541 |
| 1421194_at   | Itga4            | 163.19   | 162.53 | 198.33 | 157.14 | 211.29  | 106.51  | 112.47 | 144    | 110.53 | 178.496      | 118.3775    | 1.51       | 8.771863704 |
| 1452231_x_at | lfi203           | 5763.4   | 6223.6 | 4588.5 | 6037.1 | 4925.8  | 4142.6  | 3338.5 | 3073.9 | 4070.8 | 5507.662     | 3656.42     | 1.51       | 8.097849177 |
| 1418261_at   | Syk              | 4562.1   | 4050.1 | 3358.3 | 3863.3 | 3645.14 | 3108.7  | 2312.4 | 2283.7 | 2679.5 | 3895.79      | 2596.0625   | 1.50       | 6.965891765 |
| 1419259_at   | Rsu1             | 2002.7   | 2519.6 | 2658.5 | 2058   | 2531.36 | 1439.7  | 1336.9 | 1784.5 | 1722.2 | 2354.026     | 1570.8525   | 1.50       | 8.097849177 |
| 1445665_at   | ---              | 140.61   | 111.01 | 108.13 | 118.17 | 123.4   | 91.32   | 60     | 101.86 | 68.83  | 120.264      | 80.5025     | 1.49       | 10.58793513 |
| 1451176_at   | Mavs             | 715.35   | 627.72 | 548.94 | 548.42 | 618.97  | 330.32  | 519.82 | 367.3  | 426.59 | 611.88       | 411.0075    | 1.49       | 9.641274853 |
| 1452085_at   | Gatad1           | 740.37   | 653.67 | 708.41 | 648.91 | 831.9   | 395.12  | 456.41 | 564.42 | 510.96 | 716.652      | 481.7275    | 1.49       | 6.337939258 |
| 1426906_at   | lfi203           | 4186     | 4151.2 | 3789.4 | 4990.3 | 3681.09 | 3128.1  | 2435.2 | 2373.3 | 3281.3 | 4159.592     | 2804.4525   | 1.48       | 8.771863704 |
| 1416968_a_at | Hsd3b7           | 1194.2   | 1270.7 | 1342.2 | 1116.4 | 1343.65 | 840.3   | 912.35 | 725.31 | 912.46 | 1253.438     | 847.605     | 1.48       | 3.69132726  |
| 1424015_at   | Dennd5a          | 2175.9   | 2312.5 | 2418.9 | 1741.6 | 2042.68 | 1505    | 1381.2 | 1383.9 | 1518   | 2138.322     | 1447.02     | 1.48       | 5.141491541 |

Table S2. Pbx1-regulated genes in CMPs

## Genes down-regulated in the absence of Pbx1

| Probe Set    | Gene Symbol       | Controls |        |        |        |         | Mutants |        |        |        | Average Cont | Average Mut | Fold Diff. | q-value(%)  |
|--------------|-------------------|----------|--------|--------|--------|---------|---------|--------|--------|--------|--------------|-------------|------------|-------------|
|              |                   | CMP3     | CMP4   | CMP6   | CMP8   | CMP10   | CMP1    | CMP2   | CMP5   | CMP7   |              |             |            |             |
| 1458980_at   | ---               | 525.96   | 410.67 | 466.23 | 409.12 | 508.04  | 273.57  | 277.58 | 311.64 | 393.48 | 464.004      | 314.0675    | 1.48       | 8.771863704 |
| 1430028_at   | 2210018M11Rik     | 216.91   | 176.23 | 179.38 | 161.56 | 154.93  | 128.13  | 127.65 | 122.39 | 103.43 | 177.802      | 120.4       | 1.48       | 8.097849177 |
| 1448926_at   | Hoxa5             | 174.64   | 168.4  | 124.31 | 157.65 | 151.89  | 136.95  | 88.46  | 96.23  | 101.67 | 155.378      | 105.8275    | 1.47       | 11.91840305 |
| 1417503_at   | Rfc2              | 3518.5   | 3661.6 | 3530.1 | 4452.4 | 3325.49 | 3179.8  | 2037.5 | 2131.7 | 2731.6 | 3697.586     | 2520.135    | 1.47       | 11.91840305 |
| 1423999_at   | Abl1              | 1064.5   | 1422.4 | 1000.7 | 1131.1 | 1216.92 | 926.13  | 852.64 | 696.32 | 712.93 | 1167.128     | 797.005     | 1.46       | 10.52884906 |
| 1425104_at   | Kctd1             | 541.56   | 398.06 | 403.4  | 413.58 | 429.49  | 278.75  | 294.36 | 304.27 | 320.14 | 437.218      | 299.38      | 1.46       | 7.270796118 |
| 1433756_at   | S100pbp           | 500.35   | 413.05 | 417.3  | 423.21 | 355.03  | 330.7   | 265.9  | 275.2  | 285.43 | 421.788      | 289.3075    | 1.46       | 7.013521794 |
| 1423070_at   | Rpl21             | 297.65   | 326.54 | 342.69 | 243.27 | 307.9   | 188.14  | 161.43 | 227.79 | 255.64 | 303.61       | 208.25      | 1.46       | 12.10755341 |
| 1426957_at   | Trp53bp1          | 439.13   | 582.32 | 468.78 | 528.94 | 509.89  | 360.29  | 414.41 | 330.78 | 285.43 | 505.812      | 347.7275    | 1.45       | 8.097849177 |
| 1423609_a_at | Mgat1             | 2279.7   | 2959.1 | 2156.9 | 2562.7 | 2645.41 | 1916.6  | 1750.6 | 1614.6 | 1688.1 | 2520.75      | 1742.4725   | 1.45       | 6.965891765 |
| 1426365_at   | 2810403A07Rik     | 719.92   | 942.05 | 737.2  | 769.03 | 770.25  | 664.8   | 484.94 | 618    | 419.47 | 787.69       | 546.8025    | 1.44       | 12.10755341 |
| 1451075_s_at | Ctdsp2            | 4036.2   | 4172.7 | 4162.2 | 4137.5 | 4760.96 | 2836.1  | 2988.6 | 2422   | 3627.2 | 4253.924     | 2968.4675   | 1.43       | 6.061547922 |
| 1434361_at   | Snx33             | 127.27   | 124.45 | 125.01 | 137.05 | 126.08  | 99.64   | 93.86  | 87.91  | 76.31  | 127.972      | 89.43       | 1.43       | 0           |
| 1427317_at   | Kin               | 432.46   | 411.33 | 425.9  | 389.89 | 428.08  | 320.63  | 298.97 | 329.46 | 228.62 | 417.532      | 294.42      | 1.42       | 5.141491541 |
| 1436121_a_at | Nsmce1            | 1281     | 1441.7 | 1255.5 | 1134.6 | 1178.68 | 870.3   | 780.63 | 901.21 | 1021.2 | 1258.288     | 893.3325    | 1.41       | 5.645559339 |
| 1416118_at   | Trim59            | 1386.3   | 1751.7 | 1640.4 | 1674.4 | 1944.61 | 1219.2  | 1132.8 | 1247.8 | 1183.1 | 1679.474     | 1195.705    | 1.40       | 6.337939258 |
| 1454979_at   | Diap1             | 3918.3   | 4705.9 | 3562.3 | 4170.8 | 3940.21 | 3305.7  | 3246.9 | 2417.2 | 2633.9 | 4059.494     | 2900.9175   | 1.40       | 8.771863704 |
| 1423655_a_at | 1500010J02Rik     | 732.1    | 642.54 | 747.8  | 722.87 | 715.6   | 529.66  | 457.1  | 453.71 | 602.13 | 712.182      | 510.65      | 1.39       | 5.141491541 |
| 1455502_at   | Madd              | 2178.9   | 1762.2 | 1752.7 | 1912.3 | 2186.91 | 1275.4  | 1475   | 1310.1 | 1575.9 | 1958.578     | 1409.1      | 1.39       | 7.270796118 |
| 1416662_at   | Sardh             | 132.98   | 122.84 | 119.82 | 147.3  | 168.75  | 104.36  | 99.27  | 98.78  | 99.95  | 138.338      | 100.59      | 1.38       | 11.91840305 |
| 1451519_at   | Rnf2              | 538.31   | 628.53 | 598.1  | 633.75 | 634.9   | 393.03  | 397.37 | 529.14 | 446.16 | 606.718      | 441.425     | 1.37       | 6.061547922 |
| 1428881_at   | Klc1 /// LOC10004 | 390.47   | 411.04 | 444.89 | 394.93 | 399.25  | 335.92  | 275.66 | 328.99 | 249.14 | 408.116      | 297.4275    | 1.37       | 5.141491541 |
| 1452214_at   | Skil              | 589.36   | 506.75 | 472.95 | 523.52 | 600.27  | 367.15  | 322.63 | 424.19 | 461.82 | 538.57       | 393.9475    | 1.37       | 10.58793513 |
| 1453095_at   | Rab10             | 2513.2   | 2495.5 | 2832.7 | 2360.6 | 2505.29 | 1956.2  | 1612   | 1953.4 | 1920.5 | 2541.438     | 1860.5025   | 1.37       | 3.69132726  |
| 1448928_at   | Hdac6             | 405.9    | 368.12 | 444.8  | 364.64 | 415.6   | 298.51  | 297.89 | 287.27 | 289.76 | 399.812      | 293.3575    | 1.36       | 3.69132726  |
| 1416406_at   | Pea15a            | 147.94   | 120.41 | 147.11 | 144.89 | 148.24  | 107.6   | 101.76 | 101.62 | 106.05 | 141.718      | 104.2575    | 1.36       | 3.69132726  |
| 1453032_at   | Mobkl3            | 965.89   | 863.73 | 958.06 | 954.12 | 971.4   | 764.97  | 553.38 | 749.52 | 707.51 | 942.64       | 693.845     | 1.36       | 5.141491541 |
| 1423269_a_at | Nedd4l            | 347.03   | 424.58 | 364.4  | 348.36 | 332.11  | 305.66  | 215.2  | 277.37 | 272.33 | 363.296      | 267.64      | 1.36       | 10.52884906 |
| 1434373_at   | Fam168a           | 236.85   | 267.51 | 262.52 | 284.28 | 261.27  | 193.19  | 166.84 | 221.56 | 192.04 | 262.486      | 193.4075    | 1.36       | 5.141491541 |
| 1422517_a_at | Znr1              | 2811.4   | 2785.6 | 2716.4 | 2864.6 | 2839.62 | 2084.5  | 1700.1 | 2141.3 | 2391.7 | 2803.518     | 2079.4      | 1.35       | 5.141491541 |
| 1460334_at   | Dbnl              | 1088.3   | 1144.3 | 1058.8 | 1098.4 | 1127.61 | 923.24  | 821.32 | 835.94 | 700.54 | 1103.484     | 820.26      | 1.35       | 3.69132726  |
| 1424971_at   | Ccdc99            | 404      | 419.14 | 418.77 | 325.43 | 364.76  | 252.99  | 284.15 | 323.93 | 296.09 | 386.42       | 289.29      | 1.34       | 9.641274853 |
| 1449705_x_at | Mcm3              | 2903.2   | 3915.7 | 3739.7 | 3310.9 | 3153.46 | 2822.2  | 2532.4 | 2464.1 | 2383.5 | 3404.584     | 2550.5625   | 1.33       | 10.58793513 |
| 1426241_a_at | Scmh1             | 265.8    | 244.13 | 260.23 | 304.2  | 250.98  | 203.83  | 162.99 | 223.22 | 204.32 | 265.068      | 198.59      | 1.33       | 8.771863704 |
| 1434320_at   | Gtf3c4            | 2233     | 2508.9 | 2024.1 | 2315.6 | 2475.64 | 2004.2  | 1666   | 1832.2 | 1426   | 2311.45      | 1732.085    | 1.33       | 9.641274853 |
| 1418262_at   | Syk               | 678.89   | 565.15 | 568.99 | 584.6  | 630.59  | 523.28  | 347.1  | 451.58 | 496.73 | 605.644      | 454.6725    | 1.33       | 12.10755341 |
| 1448361_at   | Ttc3              | 3317.7   | 3367.9 | 3467   | 3031.5 | 3613.01 | 2625.4  | 2574.2 | 2066.2 | 2892   | 3359.42      | 2539.4525   | 1.32       | 7.270796118 |

Table S2. Pbx1-regulated genes in CMPs

## Genes down-regulated in the absence of Pbx1

| Probe Set    | Gene Symbol   | Controls |        |        |        |         | Mutants |        |        |        | Average Cont | Average Mut | Fold Diff. | q-value(%)  |
|--------------|---------------|----------|--------|--------|--------|---------|---------|--------|--------|--------|--------------|-------------|------------|-------------|
|              |               | CMP3     | CMP4   | CMP6   | CMP8   | CMP10   | CMP1    | CMP2   | CMP5   | CMP7   |              |             |            |             |
| 1448946_at   | Kif3c         | 274.82   | 266.67 | 247.52 | 320.76 | 257.56  | 205.98  | 201.05 | 178.68 | 242.77 | 273.466      | 207.12      | 1.32       | 12.10755341 |
| 1434561_at   | Asxl1         | 2409     | 2553.6 | 3030.3 | 2528.7 | 2809.48 | 2362    | 1852.8 | 1894.5 | 1983.4 | 2666.212     | 2023.14     | 1.32       | 9.641274853 |
| 1454641_at   | Cggbp1        | 7519.2   | 7962.1 | 8213.8 | 7253.3 | 6751.91 | 6279.1  | 6078.8 | 5930.6 | 4818.8 | 7540.054     | 5776.8      | 1.31       | 8.097849177 |
| 1455269_a_at | Coro1a        | 12262    | 11791  | 12084  | 10764  | 11100.3 | 10133   | 9868.1 | 7631   | 8055.5 | 11600.316    | 8921.9125   | 1.30       | 8.771863704 |
| 1415726_at   | Ankrd17       | 1186.9   | 1197.8 | 1113.9 | 1098.4 | 1049.15 | 986.04  | 746.81 | 954.65 | 806.72 | 1129.236     | 873.555     | 1.29       | 8.097849177 |
| 1429613_at   | Dusp28        | 151.55   | 141.25 | 134.55 | 147.91 | 132.64  | 99.29   | 99.58  | 119.37 | 122.17 | 141.58       | 110.1025    | 1.29       | 6.965891765 |
| 1423975_s_at | Numa1         | 1999.5   | 1816.2 | 1977.4 | 1889.6 | 1898.26 | 1498.7  | 1849.9 | 1332.7 | 1292.6 | 1916.17      | 1493.46     | 1.28       | 11.91840305 |
| 1454851_at   | Nr2c2         | 3029.5   | 3791.7 | 3292.9 | 3505.8 | 3516.7  | 3036.5  | 2507.5 | 2419.8 | 2732.2 | 3427.3       | 2674.005    | 1.28       | 8.771863704 |
| 1455020_at   | Snx25         | 223.19   | 253.61 | 228.92 | 267.35 | 242.26  | 195.42  | 174.59 | 187.51 | 202.55 | 243.066      | 190.0175    | 1.28       | 5.645559339 |
| 1417815_a_at | Serinc3       | 6767.3   | 6390.5 | 6436.7 | 5687.2 | 6989.33 | 4305.4  | 5182.2 | 5696.6 | 5042.5 | 6454.198     | 5056.7      | 1.28       | 10.52884906 |
| 1425224_at   | Slmo1         | 84.71    | 89.43  | 105.27 | 87.89  | 101.86  | 67.48   | 69.85  | 80.99  | 76.95  | 93.832       | 73.8175     | 1.27       | 10.58793513 |
| 1426479_a_at | Cnpy3         | 645.74   | 607.43 | 647.41 | 651.23 | 729.14  | 595.92  | 443.66 | 498.66 | 533.12 | 656.19       | 517.84      | 1.27       | 10.52884906 |
| 1429499_at   | Fbxo5         | 2613.6   | 2160.8 | 2111.6 | 2295.5 | 2251.41 | 1914.8  | 1887.2 | 1602   | 1895.7 | 2286.572     | 1824.93     | 1.25       | 10.52884906 |
| 1423656_x_at | 1500010J02Rik | 809.17   | 715.53 | 800.82 | 721.1  | 739.09  | 581.16  | 566.98 | 609.08 | 666.05 | 757.142      | 605.8175    | 1.25       | 5.141491541 |
| 1423392_at   | Clic4         | 3570     | 2973.2 | 3442.2 | 4453.7 | 3511.16 | 3530.4  | 1928.7 | 2588.1 | 3619   | 3590.072     | 2916.5275   | 1.23       | 5.141491541 |
| 1454977_at   | C2cd3         | 398.32   | 424.61 | 366.95 | 421.03 | 399.31  | 361.23  | 338.02 | 312.64 | 299.47 | 402.044      | 327.84      | 1.23       | 7.270796118 |
| 1451459_at   | Ahctf1        | 922.16   | 886.57 | 830.58 | 817.19 | 888.34  | 737.16  | 727.15 | 741.37 | 650.13 | 868.968      | 713.9525    | 1.22       | 5.141491541 |
| 1451125_at   | Paip2b        | 576.55   | 649.55 | 635.11 | 674.22 | 738.16  | 544.87  | 533.74 | 506.19 | 570.37 | 654.718      | 538.7925    | 1.22       | 11.91840305 |
| 1454636_at   | Cbx5          | 3078.7   | 3011.5 | 3482.7 | 2981   | 3119.67 | 2562.1  | 2601.3 | 2483.6 | 2758.1 | 3134.71      | 2601.265    | 1.21       | 6.337939258 |
| 1424078_s_at | Pex6          | 1037.6   | 1144.4 | 1000.8 | 1005.1 | 1014.14 | 855.41  | 905.13 | 856.22 | 844.02 | 1040.402     | 865.195     | 1.20       | 5.141491541 |
| 1448252_a_at | Eef1b2        | 17117    | 20000  | 20000  | 18335  | 18927.3 | 16263   | 15633  | 16964  | 16595  | 18875.982    | 16363.79    | 1.15       | 10.52884906 |
| 1442828_at   | Ifi203        | 69.94    | 71.8   | 69.46  | 72.5   | 76.37   | 62.08   | 60     | 65.95  | 62.38  | 72.014       | 62.6025     | 1.15       | 5.141491541 |

Table S3. Pbx1-regulated genes in GMPs

**Genes up-regulated in the absence of Pbx1**

| Probe Set    | Gene Symbol   | Controls |        |        |        |        | Mutants |        |        |        |        | Av Cont | Av Mut   | Fold Diff | q-value(%)  |
|--------------|---------------|----------|--------|--------|--------|--------|---------|--------|--------|--------|--------|---------|----------|-----------|-------------|
|              |               | GMP3     | GMP4   | GMP6   | GMP8   | GMP10  | GMP1    | GMP2   | GMP5   | GMP7   | GMP9   |         |          |           |             |
| 1430156_at   | 4930520O04Rik | 60       | 60     | 71.33  | 65.64  | 80.84  | 113.52  | 134.71 | 124.9  | 148.23 | 132.03 | 67.562  | 130.678  | 1.93      | 0           |
| 1448256_at   | Gosr1         | 213.32   | 149.12 | 193.73 | 194.37 | 107.06 | 275.91  | 338.5  | 262.76 | 267.07 | 366.64 | 171.52  | 302.176  | 1.76      | 12.80530892 |
| 1421498_a_at | 2010204K13Rik | 325.85   | 231.54 | 177.77 | 187.72 | 267.17 | 418.47  | 379.73 | 405.33 | 401.91 | 414.2  | 238.01  | 403.928  | 1.70      | 9.68401487  |
| 1416974_at   | Stam2         | 280.04   | 246.48 | 333.93 | 259.45 | 273.41 | 567.64  | 467.5  | 386.91 | 380.63 | 490.74 | 278.662 | 458.684  | 1.65      | 10.26738926 |
| 1422476_at   | Ifi30         | 623.74   | 640.27 | 712.56 | 859.82 | 684.05 | 1228.8  | 1032.1 | 1011.2 | 928.41 | 1073   | 704.088 | 1054.716 | 1.50      | 10.26738926 |
| 1455658_at   | Cggbp1        | 373.39   | 328.86 | 294.21 | 281.77 | 289.54 | 404.6   | 472.55 | 459.18 | 399.04 | 526.09 | 313.554 | 452.292  | 1.44      | 10.26738926 |
| 1424519_at   | Mtg1          | 436.82   | 426.49 | 462.57 | 368.29 | 459.21 | 563.68  | 517.75 | 511.17 | 536.44 | 538.29 | 430.676 | 533.466  | 1.24      | 10.26738926 |
| 1423992_at   | Gatad2a       | 664.59   | 616.75 | 629.85 | 688.66 | 659.99 | 806.67  | 768.68 | 732.93 | 839.33 | 811.03 | 651.968 | 791.728  | 1.21      | 9.68401487  |

Table S3. Pbx1-regulated genes in GMPs

## Genes down-regulated in the absence of Pbx1

| Probe Set    | Gene Symbol        | Controls |        |        |        |        | Mutants |       |       |       |       | Av Cont  | Av Mut  | Fold Diff | q-value(%)  |
|--------------|--------------------|----------|--------|--------|--------|--------|---------|-------|-------|-------|-------|----------|---------|-----------|-------------|
|              |                    | GMP3     | GMP4   | GMP6   | GMP8   | GMP10  | GMP1    | GMP2  | GMP5  | GMP7  | GMP9  |          |         |           |             |
| 1457722_at   | Klrb1f             | 270.48   | 367.57 | 208.83 | 231.86 | 256.38 | 60      | 91.67 | 123.3 | 129.9 | 69.2  | 267.024  | 94.808  | 2.82      | 9.68401487  |
| 1455698_at   | Sec62              | 383.65   | 245.2  | 252.83 | 236.38 | 189.55 | 60      | 91.28 | 173.4 | 92.2  | 60    | 261.522  | 95.384  | 2.74      | 9.68401487  |
| 1424033_at   | Sfrs7              | 2237.6   | 2540   | 1720.2 | 1842.4 | 1556.7 | 558.7   | 582.3 | 1153  | 1158  | 422.8 | 1979.376 | 775.096 | 2.55      | 9.68401487  |
| 1434243_s_at | Tomm70a            | 400.91   | 339.23 | 295.62 | 264.05 | 212.85 | 70.21   | 88.19 | 184.6 | 188.1 | 101   | 302.532  | 126.422 | 2.39      | 9.68401487  |
| 1428985_at   | Ints12             | 285.56   | 296.04 | 193.2  | 219.04 | 110.25 | 60      | 91.51 | 146   | 109   | 60    | 220.818  | 93.292  | 2.37      | 11.5384007  |
| 1435331_at   | Pyhin1             | 549.69   | 528.31 | 418.69 | 415.55 | 461.98 | 60      | 141.7 | 395.3 | 219.4 | 199.3 | 474.844  | 203.132 | 2.34      | 9.68401487  |
| 1423547_at   | Lyz2               | 1709.9   | 1761   | 1226.7 | 1221.8 | 924.09 | 344.2   | 730   | 766.9 | 562.3 | 562.4 | 1368.69  | 593.126 | 2.31      | 9.68401487  |
| 1456063_at   | ORF34              | 272.2    | 226.59 | 159.91 | 197.12 | 108.82 | 63.74   | 82.85 | 99.42 | 111.3 | 67.58 | 192.928  | 84.978  | 2.27      | 9.68401487  |
| 1452657_at   | Ap1s2              | 635.69   | 646.84 | 722.94 | 680    | 499.22 | 60      | 278.7 | 534.3 | 263.1 | 269.9 | 636.938  | 281.19  | 2.27      | 9.68401487  |
| 1435912_at   | Ubx2               | 297.08   | 360.91 | 193.21 | 271.61 | 185.1  | 60      | 79.24 | 164.3 | 156.7 | 124.6 | 261.582  | 116.968 | 2.24      | 9.68401487  |
| 1416618_at   | Ppox               | 274.17   | 128.39 | 154.22 | 157.5  | 128.82 | 60      | 81.45 | 69.75 | 72.95 | 99.95 | 168.62   | 76.82   | 2.20      | 12.34069152 |
| 1431067_at   | 2210012G02Rik      | 129.71   | 163.95 | 190.79 | 102.38 | 130.9  | 60      | 83.37 | 69    | 60    | 71.77 | 143.546  | 68.828  | 2.09      | 9.68401487  |
| 1417702_a_at | Hnmt               | 194.72   | 200.08 | 190.45 | 158.62 | 77.51  | 60      | 82.16 | 124   | 70.49 | 60    | 164.276  | 79.322  | 2.07      | 12.34069152 |
| 1455336_at   | Thap2              | 631.59   | 631.17 | 386.59 | 453.11 | 297.68 | 187.5   | 272   | 329.8 | 249.2 | 125.5 | 480.028  | 232.822 | 2.06      | 12.34069152 |
| 1452080_a_at | Dcun1d1            | 214      | 205.14 | 254.7  | 171.85 | 177.01 | 71.92   | 60    | 172.8 | 106.3 | 86.69 | 204.54   | 99.528  | 2.06      | 9.68401487  |
| 1415937_s_at | Pdcd6ip            | 277.7    | 222.67 | 234.19 | 239.32 | 138.55 | 60      | 78.7  | 125.8 | 197   | 92.13 | 222.486  | 110.718 | 2.01      | 11.5384007  |
| 1448502_at   | Slc16a7            | 300.33   | 273.24 | 196.65 | 233.6  | 188.65 | 78.37   | 80.8  | 147.9 | 171.5 | 124.9 | 238.494  | 120.678 | 1.98      | 9.68401487  |
| 1454666_at   | LOC100046855       | 264.36   | 343.57 | 344.45 | 241.73 | 245.61 | 65.3    | 148.3 | 216.1 | 175.9 | 129.6 | 287.944  | 147.02  | 1.96      | 9.68401487  |
| 1416029_at   | Klf10              | 293.1    | 431.88 | 296.58 | 282.08 | 294.29 | 127.7   | 130   | 249.8 | 231.8 | 88.64 | 319.586  | 165.596 | 1.93      | 9.68401487  |
| 1450095_a_at | Acyp1              | 726.73   | 751.33 | 438.4  | 655.54 | 491.63 | 60      | 363.6 | 351.8 | 416.8 | 414.3 | 612.726  | 321.298 | 1.91      | 12.80530892 |
| 1450484_a_at | Cmpk2              | 138.29   | 173.09 | 222.55 | 132.94 | 133.51 | 60      | 61.51 | 141.1 | 96.13 | 60.99 | 160.076  | 83.952  | 1.91      | 12.80530892 |
| 1450020_at   | Cx3cr1 /// LOC1000 | 378.5    | 367.18 | 258.24 | 334.93 | 429.72 | 293     | 145.2 | 102.2 | 274.7 | 112.9 | 353.714  | 185.594 | 1.91      | 11.5384007  |
| 1434144_s_at | 2410187C16Rik      | 867.39   | 716.5  | 588.23 | 549.37 | 502.16 | 90.31   | 522.4 | 388.9 | 358   | 332.7 | 644.73   | 338.446 | 1.90      | 12.80530892 |
| 1452094_at   | P4ha1              | 372.51   | 348.87 | 294.7  | 371.23 | 273.51 | 60      | 157.4 | 235.2 | 259.7 | 168.7 | 332.164  | 176.18  | 1.89      | 9.68401487  |
| 1425993_a_at | Hsph1              | 6959.8   | 6460.4 | 6962.1 | 5266.7 | 6063.2 | 4000    | 2538  | 5352  | 2751  | 2342  | 6342.418 | 3396.64 | 1.87      | 9.68401487  |
| 1417594_at   | Gkap1              | 484.38   | 392.33 | 269.41 | 309.13 | 315.07 | 147.4   | 133   | 171.8 | 197.6 | 302.4 | 354.064  | 190.42  | 1.86      | 11.5384007  |
| 1432431_s_at | Macrod2            | 174.87   | 155.67 | 103.43 | 160.14 | 101.31 | 60      | 60    | 102.2 | 76.89 | 80.6  | 139.084  | 75.928  | 1.83      | 9.68401487  |
| 1430034_at   | Cct4               | 197.02   | 141.51 | 199.99 | 171.57 | 167.3  | 89.8    | 100.3 | 110.2 | 107.7 | 72.32 | 175.478  | 96.068  | 1.83      | 0           |
| 1442118_at   | ---                | 156.64   | 100.1  | 149.05 | 174.02 | 176.43 | 60      | 147.2 | 72.95 | 62.85 | 72.84 | 151.248  | 83.164  | 1.82      | 12.80530892 |
| 1434510_at   | Papss2             | 1163.5   | 789.17 | 900.17 | 966.47 | 832.34 | 418.9   | 556.8 | 648.3 | 273   | 667.6 | 930.338  | 512.906 | 1.81      | 9.68401487  |
| 1418520_at   | Tgoln1             | 149.82   | 164    | 120.46 | 163.99 | 108.85 | 60      | 81.79 | 121.8 | 67.23 | 60    | 141.424  | 78.17   | 1.81      | 9.68401487  |
| 1434373_at   | B930006L02Rik      | 312.73   | 267.03 | 249.07 | 219.6  | 191.4  | 64.78   | 168.8 | 166.6 | 163.6 | 126.5 | 247.966  | 138.07  | 1.80      | 9.68401487  |
| 1448170_at   | Siah2              | 297.39   | 269.82 | 273.17 | 311.21 | 275.62 | 60      | 111.2 | 277.8 | 182.7 | 165   | 285.442  | 159.322 | 1.79      | 11.5384007  |
| 1449303_at   | Sesn3              | 211.88   | 210.12 | 143.8  | 160.3  | 137.32 | 60      | 78.89 | 114.6 | 129.3 | 99.39 | 172.684  | 96.428  | 1.79      | 9.68401487  |
| 1440303_at   | Slc7a6os           | 215.74   | 140.79 | 137.01 | 128.51 | 145.28 | 60      | 75.23 | 126.9 | 85.72 | 85.96 | 153.466  | 86.764  | 1.77      | 11.5384007  |
| 1433649_at   | Aof1               | 255.56   | 306.17 | 229.48 | 217.25 | 178.09 | 61.93   | 134.1 | 166.9 | 190.7 | 121.4 | 237.31   | 135.008 | 1.76      | 12.34069152 |
| 1439815_at   | Heatr5b            | 483.24   | 394.53 | 422.48 | 365.58 | 346.63 | 94.55   | 199.8 | 349.8 | 270.4 | 243.4 | 402.492  | 231.59  | 1.74      | 10.26738926 |

Table S3. Pbx1-regulated genes in GMPs

## Genes down-regulated in the absence of Pbx1

| Probe Set    | Gene Symbol         | Controls |        |        |        |        | Mutants |       |       |       |       | Av Cont   | Av Mut   | Fold Diff | q-value(%)  |
|--------------|---------------------|----------|--------|--------|--------|--------|---------|-------|-------|-------|-------|-----------|----------|-----------|-------------|
|              |                     | GMP3     | GMP4   | GMP6   | GMP8   | GMP10  | GMP1    | GMP2  | GMP5  | GMP7  | GMP9  |           |          |           |             |
| 1448944_at   | Nrp1                | 177.63   | 205.02 | 167.73 | 155.24 | 120.37 | 99.39   | 60    | 100.4 | 140.1 | 76.24 | 165.198   | 95.222   | 1.73      | 9.68401487  |
| 1429059_s_at | Tmem107             | 280.05   | 219.14 | 197.68 | 208.45 | 185.07 | 76.57   | 139.2 | 166.1 | 142.1 | 105.3 | 218.078   | 125.85   | 1.73      | 9.68401487  |
| 1427978_at   | 4732418C07Rik       | 204.06   | 202.16 | 144.87 | 156.13 | 136.31 | 60      | 86.4  | 102.6 | 122.4 | 125.8 | 168.706   | 99.446   | 1.70      | 9.68401487  |
| 1449267_at   | Chid1               | 272.78   | 200.92 | 303.67 | 259.49 | 187.36 | 177     | 113.1 | 177.2 | 138.5 | 117.3 | 244.844   | 144.59   | 1.69      | 9.68401487  |
| 1455548_at   | Dlgap4              | 131.91   | 89.37  | 111.94 | 136.27 | 135.38 | 60      | 60    | 83.49 | 93.93 | 60    | 120.974   | 71.484   | 1.69      | 9.68401487  |
| 1427730_a_at | Zfp148              | 138.69   | 113.34 | 117.03 | 100.37 | 76.36  | 60      | 60    | 72.9  | 69.75 | 60    | 109.158   | 64.53    | 1.69      | 9.68401487  |
| 1435384_at   | Ube2n               | 233.99   | 172.94 | 155.57 | 193.97 | 166.29 | 80.51   | 89.74 | 138.3 | 161.6 | 78.21 | 184.552   | 109.662  | 1.68      | 11.5384007  |
| 1417534_at   | Itgb5               | 158.55   | 190.41 | 155.06 | 163.7  | 165.62 | 60      | 60    | 106.6 | 128.4 | 141.6 | 166.668   | 99.306   | 1.68      | 9.68401487  |
| 1435914_at   | Ncor1               | 151.56   | 140.33 | 144.17 | 137.62 | 91.38  | 60      | 84.96 | 79.19 | 110.3 | 64.28 | 133.012   | 79.746   | 1.67      | 9.68401487  |
| 1435490_at   | Hk3                 | 4064.4   | 3615.3 | 2524.4 | 3582.6 | 2399.9 | 1970    | 1953  | 2052  | 2178  | 1553  | 3237.322  | 1941.112 | 1.67      | 9.68401487  |
| 1433699_at   | Tnfaip3             | 275.27   | 217.49 | 199.02 | 185.36 | 131.56 | 112.7   | 148.3 | 133.2 | 97.14 | 121   | 201.74    | 122.46   | 1.65      | 12.80530892 |
| 1455544_at   | Zranb3              | 242.08   | 195.02 | 215.32 | 195.74 | 180.27 | 87.46   | 69.32 | 151.3 | 167.8 | 149.9 | 205.686   | 125.146  | 1.64      | 9.68401487  |
| 1415901_at   | Plod3               | 1723.3   | 1797.7 | 1732.5 | 2181.8 | 1686.6 | 623.1   | 1127  | 1451  | 1214  | 1138  | 1824.376  | 1110.522 | 1.64      | 9.68401487  |
| 1452155_a_at | Ddx17               | 5171.4   | 6048.5 | 5626.8 | 5597.2 | 4491.2 | 1739    | 3103  | 3545  | 3795  | 4350  | 5387.02   | 3306.506 | 1.63      | 9.68401487  |
| 1428873_a_at | Casc3 /// LOC10004  | 168.71   | 120.86 | 130.16 | 133.81 | 148.69 | 60      | 130.7 | 109.8 | 69.59 | 62.47 | 140.446   | 86.498   | 1.62      | 12.80530892 |
| 1418806_at   | Csf3r               | 1111.5   | 1153.5 | 796.93 | 914.34 | 825.8  | 490.6   | 618.8 | 666.8 | 670.1 | 539   | 960.428   | 597.056  | 1.61      | 9.68401487  |
| 1425769_x_at | Cklf                | 168.36   | 139.41 | 198.42 | 159.67 | 152.38 | 60      | 90.59 | 157.2 | 115.9 | 85.85 | 163.648   | 101.904  | 1.61      | 12.80530892 |
| 1416289_at   | Plod1               | 130.73   | 102.73 | 113.62 | 113.63 | 92.65  | 60      | 68.16 | 96.65 | 60    | 60    | 110.672   | 68.962   | 1.60      | 9.68401487  |
| 1452821_at   | Tial1               | 435.83   | 428.05 | 329.76 | 363.32 | 382.09 | 167.6   | 258.4 | 299.1 | 321   | 170.1 | 387.81    | 243.22   | 1.59      | 9.68401487  |
| 1416059_at   | Sec23b              | 3478.2   | 4128   | 3735.7 | 3901.5 | 3016.7 | 1180    | 1846  | 2944  | 2854  | 2693  | 3652.022  | 2303.53  | 1.59      | 11.06744557 |
| 1419269_at   | Dut                 | 138.64   | 140.51 | 152.91 | 126.92 | 131.66 | 103.6   | 96.69 | 103.7 | 71.85 | 60    | 138.128   | 87.166   | 1.58      | 9.68401487  |
| 1415692_s_at | Canx                | 13473    | 14912  | 14451  | 14119  | 11989  | 4432    | 8284  | 10732 | 11222 | 9142  | 13788.636 | 8762.478 | 1.57      | 9.68401487  |
| 1428930_at   | Tmem29              | 371.27   | 259.51 | 297.8  | 256.64 | 267.49 | 182.7   | 138.1 | 235.4 | 237.9 | 137.2 | 290.542   | 186.262  | 1.56      | 11.5384007  |
| 1434444_s_at | Anapc1              | 578.11   | 588.94 | 350.43 | 615.17 | 534.19 | 313.6   | 326.6 | 386.3 | 449.9 | 242.4 | 533.368   | 343.748  | 1.55      | 12.80530892 |
| 1436597_at   | Ankhd1 /// Eif4ebp3 | 201.85   | 170.91 | 166.39 | 162.03 | 141.82 | 60      | 129.9 | 121.8 | 109.1 | 124.8 | 168.6     | 109.126  | 1.55      | 9.68401487  |
| 1421022_x_at | Acyp1               | 634.41   | 767.91 | 632.41 | 687.8  | 599.7  | 225.5   | 473.8 | 426.7 | 498   | 531.6 | 664.446   | 431.126  | 1.54      | 9.68401487  |
| 1450186_s_at | Gnas                | 8035.1   | 8487.2 | 5694.7 | 6325.4 | 5557.9 | 3185    | 4815  | 4041  | 5783  | 4493  | 6820.066  | 4463.386 | 1.53      | 12.80530892 |
| 1444343_at   | A130064L14Rik       | 130.72   | 87.05  | 99.93  | 107.31 | 86.91  | 60      | 60    | 75.72 | 79.94 | 60    | 102.384   | 67.132   | 1.53      | 9.68401487  |
| 1440886_at   | Cdc3711             | 164.36   | 174.91 | 176.42 | 144.43 | 135.56 | 60      | 132.9 | 134.4 | 92.31 | 103.2 | 159.136   | 104.55   | 1.52      | 11.5384007  |
| 1449419_at   | Dock8               | 1071.9   | 1114.9 | 831.31 | 875.01 | 730.44 | 378.6   | 717.7 | 684.3 | 656.7 | 606.6 | 924.702   | 608.78   | 1.52      | 12.34069152 |
| 1423233_at   | Cebpd               | 1499.7   | 1016.6 | 1229.9 | 1224   | 1200.7 | 534.5   | 919   | 923.2 | 733.7 | 957   | 1234.2    | 813.474  | 1.52      | 9.68401487  |
| 1422433_s_at | Idh1                | 5581.4   | 5394.9 | 7122.6 | 7174.7 | 6368.2 | 3875    | 3861  | 5245  | 3670  | 4299  | 6328.348  | 4189.884 | 1.51      | 9.68401487  |
| 1426886_at   | Cln5                | 1082.8   | 824.77 | 755.76 | 866.1  | 733.24 | 342.1   | 738.9 | 612.1 | 588.1 | 560.2 | 852.536   | 568.268  | 1.50      | 12.80530892 |
| 1429524_at   | Myo1f               | 606.85   | 599.48 | 892.26 | 739.69 | 744.48 | 293.3   | 544.5 | 511.8 | 526.4 | 515.5 | 716.552   | 478.3    | 1.50      | 11.5384007  |
| 1450034_at   | Stat1               | 674.22   | 591.27 | 668.95 | 517.2  | 590.35 | 425.3   | 455.2 | 522.8 | 295.2 | 343.6 | 608.398   | 408.424  | 1.49      | 9.68401487  |
| 1451243_at   | Rnpep               | 1424.5   | 1147.1 | 1188.2 | 1014.5 | 1027.1 | 524.5   | 874.3 | 994.7 | 767   | 740.5 | 1160.25   | 780.206  | 1.49      | 10.26738926 |
| 1448905_at   | Nme3                | 1126.7   | 1063   | 793.26 | 830.65 | 733.49 | 632.4   | 737.9 | 614   | 534.7 | 546   | 909.412   | 613.01   | 1.48      | 11.06744557 |

Table S3. Pbx1-regulated genes in GMPs

## Genes down-regulated in the absence of Pbx1

| Probe Set    | Gene Symbol        | Controls |        |        |        |        | Mutants |       |       |       |       | Av Cont   | Av Mut   | Fold Diff | q-value(%)  |
|--------------|--------------------|----------|--------|--------|--------|--------|---------|-------|-------|-------|-------|-----------|----------|-----------|-------------|
|              |                    | GMP3     | GMP4   | GMP6   | GMP8   | GMP10  | GMP1    | GMP2  | GMP5  | GMP7  | GMP9  |           |          |           |             |
| 1421000_at   | Cnot4              | 167.59   | 196.33 | 202.53 | 192.3  | 156.26 | 84.18   | 126.9 | 119.5 | 130.9 | 156.3 | 183.002   | 123.55   | 1.48      | 9.68401487  |
| 1435328_at   | Cyhr1              | 760.94   | 651.49 | 635.43 | 693.85 | 806.59 | 299.2   | 556.8 | 578.3 | 593.5 | 381.6 | 709.66    | 481.878  | 1.47      | 11.5384007  |
| 1454882_at   | L3mbtl3            | 1123.6   | 1127   | 1212.7 | 1238.7 | 1025.3 | 790.7   | 536.3 | 733.4 | 1025  | 824.5 | 1145.45   | 781.908  | 1.46      | 9.68401487  |
| 1433464_at   | lpo13              | 1060.1   | 981.49 | 1001.5 | 883.88 | 1063.2 | 558.1   | 583.5 | 818.1 | 757.5 | 718.7 | 998.042   | 687.166  | 1.45      | 9.68401487  |
| 1416151_at   | Sfrs3              | 840.63   | 806.74 | 985.87 | 793.92 | 878.16 | 530.6   | 551.6 | 757   | 661.3 | 464.8 | 861.064   | 593.04   | 1.45      | 9.68401487  |
| 1424672_at   | Dmxd1              | 151.96   | 173.86 | 159.3  | 176.26 | 144.01 | 71.78   | 122.3 | 144.8 | 111   | 106.7 | 161.078   | 111.33   | 1.45      | 9.68401487  |
| 1452869_at   | Prpf38b            | 1061.9   | 912.38 | 1006.5 | 906.23 | 1033.6 | 576.7   | 561.8 | 930.5 | 809   | 560.7 | 984.118   | 687.752  | 1.43      | 10.26738926 |
| 1447923_at   | 1810026B05Rik      | 686.66   | 779.08 | 657.32 | 702.98 | 725.03 | 287.6   | 571.9 | 626   | 534.1 | 477.5 | 710.214   | 499.42   | 1.42      | 11.5384007  |
| 1449024_a_at | Hexa               | 12737    | 11401  | 12604  | 12977  | 11495  | 4968    | 10482 | 9819  | 9232  | 8552  | 12242.77  | 8610.414 | 1.42      | 10.26738926 |
| 1428108_x_at | Tmcc2              | 259.95   | 188.21 | 192.57 | 202.08 | 171.45 | 119.5   | 140.6 | 172.1 | 133.1 | 151.7 | 202.852   | 143.404  | 1.41      | 11.5384007  |
| 1425323_a_at | BC008155           | 3324.8   | 3517.6 | 2917.4 | 3148.9 | 2645.1 | 1965    | 1876  | 2372  | 2596  | 2197  | 3110.754  | 2201.222 | 1.41      | 9.68401487  |
| 1428385_at   | March8             | 451.59   | 438.95 | 504.37 | 423.34 | 431.52 | 269.6   | 328.7 | 420.4 | 283.5 | 306.9 | 449.954   | 321.828  | 1.40      | 9.68401487  |
| 1429058_at   | Tmem107            | 2983.9   | 3552.8 | 3122.1 | 3318.9 | 3274.2 | 2026    | 1841  | 2769  | 2490  | 2576  | 3250.364  | 2340.568 | 1.39      | 9.68401487  |
| 1428890_at   | Fem1c              | 1151.4   | 1299.1 | 1032.8 | 1084.5 | 1093.6 | 559.2   | 859.6 | 916.6 | 963.5 | 799.6 | 1132.272  | 819.7    | 1.38      | 9.68401487  |
| 1438865_at   | H13                | 157.94   | 160.06 | 167.99 | 166.76 | 171.05 | 104.8   | 112.2 | 142.5 | 117.6 | 122   | 164.76    | 119.822  | 1.38      | 0           |
| 1436047_at   | Gm672              | 179.32   | 168.27 | 217.83 | 187.55 | 173.42 | 115.2   | 99.5  | 152.5 | 154.8 | 152.7 | 185.278   | 134.944  | 1.37      | 11.06744557 |
| 1420081_s_at | D2Erd750e          | 1201.1   | 1176.8 | 999.91 | 1027   | 896.11 | 931.9   | 773.2 | 785.3 | 804.7 | 588.1 | 1060.162  | 776.648  | 1.37      | 9.68401487  |
| 1436836_x_at | Cnn3 /// LOC100047 | 4057.6   | 4061.4 | 4679.2 | 4318.7 | 4413.2 | 3928    | 2134  | 2698  | 3751  | 3318  | 4306.002  | 3165.91  | 1.36      | 12.80530892 |
| 1454920_at   | Uhrf2              | 661.67   | 715.98 | 765.9  | 659.51 | 604.31 | 424.3   | 404.5 | 644.7 | 557   | 481.4 | 681.474   | 502.364  | 1.36      | 11.5384007  |
| 1427897_s_at | Suds3              | 944.76   | 898.62 | 1116.5 | 1008.4 | 1050.3 | 603.3   | 670.6 | 898.9 | 821.6 | 720.9 | 1003.722  | 743.034  | 1.35      | 9.68401487  |
| 1426878_at   | Pbrm1              | 1282.1   | 1101.8 | 1145.5 | 1151.1 | 1121.5 | 543.5   | 898.9 | 1040  | 869.7 | 956.7 | 1160.386  | 861.834  | 1.35      | 12.34069152 |
| 1426364_at   | Mrrf               | 1117.1   | 1122.6 | 1005.5 | 898.73 | 1061.7 | 819.9   | 677.1 | 878.7 | 759.5 | 748.2 | 1041.14   | 776.666  | 1.34      | 9.68401487  |
| 1451207_at   | Cbara1             | 950.15   | 882.43 | 855.75 | 948.53 | 824.52 | 579.9   | 672.8 | 678.5 | 753.2 | 662.6 | 892.276   | 669.384  | 1.33      | 0           |
| 1433442_at   | Klhl9              | 1693.6   | 1777   | 1531.1 | 1497.9 | 1351.4 | 1316    | 1021  | 1249  | 1412  | 922   | 1570.198  | 1184.026 | 1.33      | 12.34069152 |
| 1423075_at   | Lman2              | 1132.6   | 1289.7 | 1028.5 | 1051.3 | 1082.3 | 1019    | 935.2 | 899.8 | 734   | 633.9 | 1116.848  | 844.476  | 1.32      | 12.80530892 |
| 1451202_at   | C330007P06Rik      | 1108.8   | 1058.8 | 1093.8 | 1017.7 | 1092.2 | 527.7   | 797.2 | 919.1 | 891.7 | 928.2 | 1074.24   | 812.768  | 1.32      | 11.5384007  |
| 1418254_at   | Apip /// LOC100044 | 1054.4   | 899.4  | 813.39 | 891.37 | 814.35 | 674     | 576.5 | 701   | 820.6 | 635   | 894.576   | 681.43   | 1.31      | 10.26738926 |
| 1456046_at   | Cd93               | 5026.1   | 5379.6 | 3867.8 | 4833.1 | 4669.5 | 4176    | 3764  | 2816  | 3844  | 3663  | 4755.21   | 3652.574 | 1.30      | 12.34069152 |
| 1434750_at   | Exoc3              | 989.43   | 745.1  | 997.06 | 856.76 | 869.7  | 530.7   | 756   | 759.1 | 688.3 | 691.2 | 891.61    | 685.058  | 1.30      | 12.34069152 |
| 1433702_at   | Ermp1              | 1971.5   | 2104.6 | 2096.7 | 1977.6 | 1867.4 | 1122    | 1612  | 1734  | 1867  | 1400  | 2003.548  | 1547.052 | 1.30      | 12.34069152 |
| 1426488_at   | Bfar               | 544.91   | 477.76 | 567.87 | 523.26 | 478.15 | 445.5   | 411.7 | 428   | 395   | 321.5 | 518.39    | 400.322  | 1.29      | 9.68401487  |
| 1426845_at   | Pdcd2l             | 1022.6   | 822.91 | 784.13 | 852.66 | 938.63 | 694.8   | 775.3 | 734.4 | 624.8 | 681.9 | 884.194   | 702.246  | 1.26      | 9.68401487  |
| 1422484_at   | Cyca               | 7274.7   | 6260.3 | 6623   | 5920.7 | 6051.6 | 4645    | 4972  | 6108  | 5330  | 4751  | 6426.034  | 5161.266 | 1.25      | 10.26738926 |
| 1426964_at   | 3110003A17Rik      | 7403.6   | 7736.9 | 7261.6 | 7397   | 6693.3 | 5124    | 5455  | 5921  | 6507  | 6599  | 7298.474  | 5921.278 | 1.23      | 9.68401487  |
| 1455236_x_at | Serf2              | 9413.8   | 9620.5 | 10395  | 9117.7 | 9394.1 | 7377    | 8155  | 8271  | 6802  | 8583  | 9588.198  | 7837.596 | 1.22      | 9.68401487  |
| 1436783_x_at | Ywhab              | 12831    | 14465  | 11575  | 12634  | 13303  | 9346    | 11928 | 9553  | 10618 | 11772 | 12961.714 | 10643.26 | 1.22      | 12.80530892 |
| 1436116_x_at | Appl1              | 73.49    | 72.35  | 82     | 67.08  | 73.7   | 60      | 60    | 63.24 | 60    | 60    | 73.724    | 60.648   | 1.22      | 9.68401487  |

Table S3. Pbx1-regulated genes in GMPs

**Genes down-regulated in the absence of Pbx1**

| Probe Set    | Gene Symbol        | Controls |        |        |        |        | Mutants |       |       |       |       | Av Cont   | Av Mut   | Fold Diff | q-value(%)  |
|--------------|--------------------|----------|--------|--------|--------|--------|---------|-------|-------|-------|-------|-----------|----------|-----------|-------------|
|              |                    | GMP3     | GMP4   | GMP6   | GMP8   | GMP10  | GMP1    | GMP2  | GMP5  | GMP7  | GMP9  |           |          |           |             |
| 1428507_at   | Hdhd2              | 671.49   | 637.68 | 639.97 | 737.38 | 692.36 | 446     | 576   | 635.5 | 557.7 | 569.4 | 675.776   | 556.912  | 1.21      | 12.34069152 |
| 1460621_x_at | Ywhaq              | 11750    | 12911  | 13402  | 11669  | 12912  | 9760    | 10463 | 9379  | 11364 | 11246 | 12528.878 | 10442.44 | 1.20      | 9.68401487  |
| 1456071_a_at | Cycs /// LOC672195 | 12359    | 12534  | 11910  | 10794  | 11584  | 9893    | 10344 | 11350 | 8671  | 9352  | 11836.346 | 9922.096 | 1.19      | 11.06744557 |
| 1439814_at   | Atp8b4             | 4365.5   | 5268   | 4634.8 | 4643.5 | 4407.5 | 3947    | 3907  | 3919  | 3787  | 4040  | 4663.852  | 3919.95  | 1.19      | 9.68401487  |
| 1435738_x_at | Serf2              | 9431.4   | 9848.7 | 8574.3 | 8638.1 | 8373.6 | 7249    | 8171  | 7766  | 6511  | 8079  | 8973.222  | 7555.086 | 1.19      | 11.5384007  |
| 1429197_s_at | Rabgap1l           | 724.3    | 722.69 | 760.74 | 725.63 | 667.87 | 630     | 677.4 | 564.1 | 562.7 | 663.9 | 720.246   | 619.61   | 1.16      | 10.26738926 |
| 1454925_x_at | Mdh1               | 6569.3   | 6900.4 | 7052.4 | 6567.2 | 6627.4 | 5415    | 6159  | 6000  | 5932  | 5667  | 6743.334  | 5834.678 | 1.16      | 9.68401487  |
| 1454813_at   | Ccdc72             | 16171    | 16757  | 16096  | 15097  | 15813  | 12252   | 14974 | 14423 | 13955 | 14114 | 15986.804 | 13943.4  | 1.15      | 9.68401487  |
| 1426434_at   | Tmem43             | 646.25   | 571.2  | 612.72 | 607.77 | 559.68 | 545.9   | 557.2 | 545   | 523.6 | 479.5 | 599.524   | 530.226  | 1.13      | 12.34069152 |
| 1438794_x_at | Rps13              | 17300    | 19027  | 18617  | 17769  | 18776  | 16909   | 16751 | 17227 | 17160 | 17117 | 18298.052 | 17032.85 | 1.07      | 9.68401487  |



Table S4. GSEA Report

**gsea\_report\_for\_Cont**

| <b>NAME</b>                            | <b>Core enrich. SIZE</b> | <b>NOM p-val</b> | <b>FDR q-val</b> | <b>DESCRIPTION</b>                                                                                                                 | <b>FUNCTIONAL GROUP</b> |
|----------------------------------------|--------------------------|------------------|------------------|------------------------------------------------------------------------------------------------------------------------------------|-------------------------|
| <b>Report for CMP - Phenotype:Cont</b> |                          |                  |                  |                                                                                                                                    |                         |
| BRUNO_IL3_DN                           | 18                       | 0.003            | 0.026            | Annotated list of commonly downreg. genes in differentiation pathways                                                              | <b>Differentiation</b>  |
| IDX_TSA_DN_CLUSTER1                    | 13                       | 0.002            | 0.031            | Down-reg during differentiation of fibroblasts into adipocytes, vs. fibroblasts treated to prevent diff.                           | <b>Differentiation</b>  |
| TAVOR_CEBP_DN                          | 10                       | 0.007            | 0.052            | C/EBP down-regulated genes in KCL22 cells                                                                                          | <b>Differentiation</b>  |
| IDX_TSA_DN_CLUSTER2                    | 19                       | 0.010            | 0.077            | Down-reg during differentiation of fibroblasts into adipocytes, vs. fibroblasts treated to prevent differentiation                 | <b>Differentiation</b>  |
| MYOD_NIH3T3_DN                         | 18                       | 0.018            | 0.089            | Down-reg in NIH 3T3 following transduction with MyoD and incubation in differentiation medium                                      | <b>Differentiation</b>  |
| HOHENKIRK_MONOCYTE_DEND_DN             | 28                       | 0.005            | 0.093            | Down-regulated mRNAs in monocyte-derived DCs                                                                                       | <b>Differentiation</b>  |
| NADLER_OBESITY_UP                      | 20                       | 0.015            | 0.094            | Genes with increased expression with obesity (decrease in expression of genes normally involved in adipogenesis)                   | <b>Differentiation</b>  |
| IGF_VS_PDGF_DN                         | 8                        | 0.030            | 0.098            | Down-regulated in myoblasts by treatment with IGF1 (it facilitates differentiation), vs treatment with PDGF                        | <b>Differentiation</b>  |
| NADLER_OBESITY_HYPERGLYCEMIA           | 13                       | 0.028            | 0.115            | Genes correlated with the development of hyperglycemia (decrease in expression of genes involved in adipogenesis)                  | <b>Differentiation</b>  |
| IDX_TSA_DN_CLUSTER5                    | 10                       | 0.050            | 0.146            | Down-reg during differentiation of 3T3-L1 fibroblasts into adipocytes with IDX, vs. fibroblasts treated to prevent differentiation | <b>Differentiation</b>  |
| ADDYA_K562_HEMIN_TREATMENT             | 18                       | 0.000            | 0.012            | Differentially expressed genes in K562 cells after hemin treatment                                                                 | <b>Erythroid</b>        |
| PLATELET_EXPRESSED                     | 13                       | 0.000            | 0.012            | 50 genes most strongly expressed in human platelets from 3 healthy donors                                                          | <b>Platelets</b>        |
| GNATENKO_PLATELET                      | 17                       | 0.000            | 0.013            | Top expressed genes in human platelet cells.                                                                                       | <b>Platelets</b>        |
| GNATENKO_PLATELET_UP                   | 17                       | 0.002            | 0.014            | Top 50 human platelet-expressed genes                                                                                              | <b>Platelets</b>        |
| TENEDINI_MEGAKARYOCYTIC_GENES          | 16                       | 0.000            | 0.036            | Genes essential to the development of megakaryocytes                                                                               | <b>Platelets</b>        |
| TPOPATHWAY                             | 8                        | 0.014            | 0.069            |                                                                                                                                    | <b>Platelets/HSC</b>    |
| TARTE_BCELL                            | 13                       | 0.000            | 0.013            | Genes overexpressed in B cells as compared to mature plasma cells                                                                  | <b>B Lymphoid</b>       |
| HOFFMANN_BIVSBII_BI                    | 31                       | 0.000            | 0.014            | Genes with at least 5-fold change between Pre-BI and Large Pre-BII cells                                                           | <b>B Lymphoid</b>       |
| HOFFMANN_BIVSBII_BI_TABLE2             | 67                       | 0.000            | 0.036            | Genes with at least 5-fold change between Pre-BI and Large Pre-BII cells                                                           | <b>B Lymphoid</b>       |
| HADDAD_HPCLYMPHO_ENRICHED              | 43                       | 0.000            | 0.045            | Enriched in CD45RAhiLin-CD10+ ("B skewed) vs CD45RAintCD7- and CD45RAhiCD7hi HPCs                                                  | <b>B Lymphoid</b>       |
| HADDAD_HSC_CD10_UP                     | 40                       | 0.000            | 0.051            | Genes upregulated in hHSCs of the line CD45RA(hi)Lin-CD10+, biased toward B cells                                                  | <b>B Lymphoid</b>       |
| ZHAN_MMPC_LATEVS                       | 11                       | 0.005            | 0.052            | Differentially expressed in comparison of CD138-enriched tonsil PCs and CD138-enriched BM PCs                                      | <b>B Lymphoid</b>       |
| LU_IL4BCELL                            | 20                       | 0.003            | 0.052            | Genes induced in peripheral B cells by 4 hours of incubation with IL-4                                                             | <b>B Lymphoid</b>       |
| ST_B_CELL_ANTIGEN_RECEPTOR             | 10                       | 0.009            | 0.072            |                                                                                                                                    | <b>B Lymphoid</b>       |

Table S4. GSEA Report

## gsea\_report\_for\_Cont

| NAME                                               | Core enrich.<br>SIZE | NOM<br>p-val | FDR<br>q-val | DESCRIPTION                                                                                                            | FUNCTIONAL<br>GROUP  |
|----------------------------------------------------|----------------------|--------------|--------------|------------------------------------------------------------------------------------------------------------------------|----------------------|
| ZHAN_TONSIL_BONEMARROW                             | 8                    | 0.027        | 0.090        | Diifferentially expressed in CD138-enriched tonsil plasma cells and CD138-enriched BM plasma cells                     | <b>B Lymphoid</b>    |
| ZHAN_MMPC_EARLYVS                                  | 13                   | 0.022        | 0.094        | Differentiation genes differentially expressed in comparison of CD19-enriched tonsil BCs and CD138-enriched tonsil PCs | <b>B Lymphoid</b>    |
| YU_CMYC_DN                                         | 21                   | 0.013        | 0.094        | Myc-repressed genes during B-lymphomagenesis                                                                           | <b>B Lymphoid</b>    |
| SIG_BCR_SIGNALING_PATHWAY                          | 11                   | 0.020        | 0.119        |                                                                                                                        | <b>B Lymphoid</b>    |
| HOFFMANN_BIVSBII_IMVM                              | 20                   | 0.019        | 0.122        | Genes with at least 5-fold change between immature and mature B cells                                                  | <b>B Lymphoid</b>    |
| HOFFMANN_BIVSBII_LGBII                             | 32                   | 0.020        | 0.134        | Genes with at least 5-fold change between large and small Pre-BII cells                                                | <b>B Lymphoid</b>    |
| HSA04662_B_CELL_RECEPTOR_SIGNALING_PATHWAY         | 14                   | 0.039        | 0.142        |                                                                                                                        | <b>B Lymphoid</b>    |
| BASSO_GERMINAL_CENTER_CD40_DN                      | 8                    | 0.055        | 0.165        | CD40 down-regulated genes                                                                                              | <b>B Lymphoid</b>    |
| FLECHNER_KIDNEY_TRANSPLANT_REJECTION_PBL_UP        | 16                   | 0.009        | 0.076        | Upreg in PBLs of patients who rejected a kidney TX relative to patients with a well functioning kidney TX              | <b>Lymphoid</b>      |
| IL2RBPATHWAY                                       | 10                   | 0.016        | 0.082        |                                                                                                                        | <b>Lymphoid</b>      |
| FLECHNER_KIDNEY_TRANSPLANT_REJECTION_UP            | 31                   | 0.016        | 0.107        | Upreg in rejection transplanted kidney biopsies relative to well functioning transplanted kidney biopsies              | <b>Lymphoid</b>      |
| IL2PATHWAY                                         | 11                   | 0.042        | 0.127        |                                                                                                                        | <b>Lymphoid</b>      |
| HSA04612_ANTIGEN_PROCESSING_AND_PRESENTATION       | 12                   | 0.051        | 0.134        |                                                                                                                        | <b>Lymphoid</b>      |
| FLECHNER_KIDNEY_TRANSPLANT_WELL_UP                 | 105                  | 0.004        | 0.191        | Upreg in well functioning transplanted kidneys from stable, immunosuppressed recipients relative to normal kidneys     | <b>Lymphoid</b>      |
| LINDSTEDT_DEND_8H_VS_48H_DN                        | 15                   | 0.009        | 0.078        | Genes up-reg in DC stimulated for 48 h vs to DC stimulated for 8 h                                                     | <b>Lymphoid (DC)</b> |
| LINDSTEDT_DEND_UP                                  | 17                   | 0.048        | 0.135        | Genes up-regulated in DC stimulated for 8 and 48 h                                                                     | <b>Lymphoid (DC)</b> |
| LINDSTEDT_DEND_8H_VS_48H_UP                        | 15                   | 0.049        | 0.142        | Genes up-reg in DC stimulated for 8h vs to DC stimulated for 48h                                                       | <b>Lymphoid (DC)</b> |
| HSA04650_NATURAL_KILLER_CELL_MEDIATED_CYTOTOXICITY | 15                   | 0.019        | 0.117        | Genes involved in natural killer cell mediated cytotoxicity                                                            | <b>NK Lymphoid</b>   |
| LEE_TCELLS2_UP                                     | 209                  | 0.000        | 0.030        | Transcripts enriched in more mature cells (SP4, CB4, and AB4)                                                          | <b>T Lymphoid</b>    |
| LEE_TCELLS3_UP                                     | 28                   | 0.005        | 0.050        | Transcripts enriched in both ITTP and DP (less mature)                                                                 | <b>T Lymphoid</b>    |
| GOLDRATH_CELLCYCLE                                 | 11                   | 0.005        | 0.052        | Cell cycle genes induced during antigen activation of CD8+ T cells                                                     | <b>T Lymphoid</b>    |
| LEE_TCELLS4_UP                                     | 14                   | 0.018        | 0.070        | Transcripts enriched in more mature cells (SP4, CB4, and AB4)                                                          | <b>T Lymphoid</b>    |
| HSA04660_T_CELL_RECEPTOR_SIGNALING_PATHWAY         | 19                   | 0.024        | 0.117        | Genes involved in T cell receptor signaling pathway                                                                    | <b>T Lymphoid</b>    |
| HADDAD_CD45CD7_PLUS_VS_MINUS_UP                    | 13                   | 0.040        | 0.153        | Genes enriched in CD45RAhiCD7hi vs CD45RAintCD7- HPCs                                                                  | <b>T Lymphoid</b>    |
| HADDAD_HSC_CD7_UP                                  | 13                   | 0.047        | 0.159        | Upreg in hHSCs of the line CD45RA(hi)CD7+, biased toward developing into T or NK cells, vs CD45RA(int) CD7-            | <b>T Lymphoid</b>    |
| LEE_TCELLS1_UP                                     | 42                   | 0.027        | 0.159        | Transcripts enriched in more mature cells (SP4, CB4, and AB4) vs less                                                  | <b>T Lymphoid</b>    |

Table S4. GSEA Report

## gsea\_report\_for\_Cont

| NAME                                           | Core enrich.<br>SIZE | NOM<br>p-val | FDR<br>q-val | DESCRIPTION                                                                                                                         | FUNCTIONAL<br>GROUP |
|------------------------------------------------|----------------------|--------------|--------------|-------------------------------------------------------------------------------------------------------------------------------------|---------------------|
| LEE_TCELLS8_UP                                 | 42                   | 0.015        | 0.168        | mature (ITTP, DP)                                                                                                                   | T Lymphoid          |
| LEE_TCELLS10_UP                                | 42                   | 0.027        | 0.172        | Enriched in naive CD4 T cells                                                                                                       |                     |
| FICARA_LT_PBX1WT                               | 34                   | 0.000        | 0.001        | Down-regulated in Pbx1-null LT-HSCs                                                                                                 | HSC                 |
| HEMATOP_STEM_ALL_UP                            | 9                    | 0.000        | 0.010        | Up-regulated in CD34+/CD38-/Lin- cells, compared to CD34+/[CD38/Lin++                                                               | HSC                 |
| HSC_LTHSC_ADULT                                | 56                   | 0.000        | 0.011        | Up-reg in mouse HSC from adult bone marrow (LT-HSC Shared + Adult)                                                                  | HSC                 |
| HSC_LTHSC_FETAL                                | 48                   | 0.000        | 0.012        | Up-regulated in mouse HSC from fetal liver (LT-HSC Shared)                                                                          | HSC                 |
| HSC_LTHSC_SHARED                               | 47                   | 0.000        | 0.012        | Up-reg in mouse HSC from adult BM and FL (Cluster i, LT-HSC Shared)                                                                 | HSC                 |
| PARK_MSCS_BOTH                                 | 20                   | 0.002        | 0.015        | Genes commonly expressed in both HSCs and MPPs                                                                                      | HSC                 |
| HSC_HSCANDPROGENITORS_SHARED                   | 104                  | 0.000        | 0.032        | Up-reg in mouse HSC and progenitors from both adult BM and fetal liver                                                              | HSC                 |
| HSC_HSCANDPROGENITORS_FETAL                    | 104                  | 0.000        | 0.035        | Up-reg in mouse hematopoietic stem cells and progenitors from fetal liver                                                           | HSC                 |
| HSC_HSCANDPROGENITORS_ADULT                    | 104                  | 0.000        | 0.038        | Up-reg in mouse hematopoietic stem cells and progenitors from adult bone                                                            | HSC                 |
| HSC_HSC_SHARED                                 | 39                   | 0.000        | 0.042        | Up-reg in mouse HSCs from both adult BM and fetal liver                                                                             | HSC                 |
| PARK_MSCS_LIN2                                 | 14                   | 0.009        | 0.048        | Genes analyzed after negative selection of the cDNA library generated from Lin2/loSca-11Thy-11loc-kit1 cells ("self-renewal genes") | HSC                 |
| HSC_HSC_ADULT                                  | 46                   | 0.000        | 0.050        | Up-regulated in mouse hematopoietic stem cells from adult bone marrow                                                               | HSC                 |
| HSC_STHSC_FETAL                                | 8                    | 0.015        | 0.069        | Up-reg in mouse short-term functional HSCs from fetal liver                                                                         | HSC                 |
| HSC_STHSC_SHARED                               | 8                    | 0.011        | 0.070        | Up-reg in mouse ST functional HSCs from both adult BM and fetal liver                                                               | ST-HSC              |
| HSC_HSC_FETAL                                  | 39                   | 0.002        | 0.077        | Up-regulated in mouse hematopoietic stem cells from fetal liver                                                                     | HSC                 |
| HSC_STHSC_ADULT                                | 9                    | 0.018        | 0.088        | Up-reg in mouse short-term functional HSCs from adult bone marrow                                                                   | ST-HSC              |
| FETAL_LIVER_ENRICHED_<br>TRANSCRIPTION_FACTORS | 26                   | 0.005        | 0.098        |                                                                                                                                     | HSC                 |
| BOQUEST_CD31PLUS_VS_CD31MINUS_<br>DN           | 25                   | 0.009        | 0.116        | Overexpressed in CD31- vs CD31+ cells (transcripts associated with cell cycle quiescence and stemness)                              | HSC                 |
| HUMAN_CD34_ENRICHED_<br>TRANSCRIPTION_FACTORS  | 45                   | 0.017        | 0.164        |                                                                                                                                     | HSC/ST-HSC          |
| STEMCELL_HEMATOPOIETIC_UP                      | 265                  | 0.000        | 0.170        | Enriched in mouse HSCs, vs differentiated brain and bone marrow cells                                                               | HSC                 |
| HOX_GENES                                      | 10                   | 0.000        | 0.042        | HOX genes related to hematopoiesis                                                                                                  | Hox                 |
| TAKEDA_NUP8_HOXA9_3D_UP                        | 34                   | 0.000        | 0.001        | Up-regulated in CD34+ cells 3d after transduction with NUP98-HOXA9                                                                  | Cancer              |
| TAKEDA_NUP8_HOXA9_8D_UP                        | 21                   | 0.000        | 0.001        | Up-regulated in CD34+ cells 8d after transduction with NUP98-HOXA9                                                                  | Cancer              |
| POMEROY_DESMOPLASIC_VS_CLASSIC_<br>MD_UP       | 6                    | 0.000        | 0.003        | Genes expressed in desmoplastic medulloblastomas                                                                                    | Cancer              |
| BASSO_GERMINAL_CENTER_CD40_UP                  | 24                   | 0.000        | 0.003        | CD40 up-regulated genes in human transformed GC B cells                                                                             | Cancer              |
| CHIARETTI_T_ALL                                | 61                   | 0.000        | 0.003        | Genes overexpressed in leukemia cells                                                                                               | Cancer              |
| CHIARETTI_T_ALL_DIFF                           | 66                   | 0.000        | 0.009        | Genes expressed in T-cell acute lymphocytic leukemia                                                                                | Cancer              |

Table S4. GSEA Report

## gsea\_report\_for\_Cont

| NAME                                    | Core enrich.<br>SIZE | NOM<br>p-val | FDR<br>q-val | DESCRIPTION                                                                                                                 | FUNCTIONAL<br>GROUP |
|-----------------------------------------|----------------------|--------------|--------------|-----------------------------------------------------------------------------------------------------------------------------|---------------------|
| HCC_SURVIVAL_GOOD_VS_POOR_DN            | 44                   | 0.000        | 0.013        | Genes highly expressed in hepatocellular carcinoma with poor survival                                                       | Cancer              |
| FSH_OVARY_MCV152_UP                     | 12                   | 0.000        | 0.013        | Up-regin ovarian epithelial cells following FSH (follicle-stimulating hormone)                                              | Cancer              |
| BRG1_ALAB_UP                            | 9                    | 0.000        | 0.018        | Up-reg with expression of BRG1 in breast cancer cells with inactive BRG1                                                    | Cancer              |
| CROMER_HYPOPHARYNGEAL_MET_VS_<br>NON_UP | 27                   | 0.000        | 0.018        | Genes increased in metastatic hypopharyngeal cancer tumours                                                                 | Cancer              |
| HSA05220_CHRONIC_MYELOID_LEUKEMIA       | 27                   | 0.000        | 0.022        | Genes involved in chronic myeloid leukemia                                                                                  | Cancer              |
| ROSS_FAB_M7                             | 16                   | 0.004        | 0.036        | Genes upregulated in AML samples of the FAB class M7                                                                        | Cancer              |
| BRENTANI_SIGNALING                      | 36                   | 0.000        | 0.041        | Cancer related genes involved in the cell signaling                                                                         | Cancer              |
| BREASTCA_TWO_CLASSES                    | 39                   | 0.000        | 0.044        | Gene set that can be used to differentiate BRCA1-linked and BRCA2-linked breast cancers                                     | Cancer              |
| CHAUHAN_2ME2                            | 22                   | 0.003        | 0.044        | Genes influenced by 2ME2, a metabolite that has antitumor activity, in multiple myeloma cells                               | Cancer              |
| P21_P53_ANY_DN                          | 20                   | 0.005        | 0.046        | Down-regulated following ectopic expression of p21 (CDKN1A) in OvCa cells, p53-dependent                                    | Cancer              |
| GLEEVECPATHWAY                          | 8                    | 0.002        | 0.050        | Gleevec specifically targets the abnormal bcr-abl protein, an apoptosis inhibitor present in CML                            | Cancer              |
| RAS_ONCOGENIC_SIGNATURE                 | 51                   | 0.003        | 0.068        | Genes selected to discriminate cells expressing activated H-Ras from control cells (epithelial cells)                       | Cancer              |
| BRENTANI_DEATH                          | 12                   | 0.005        | 0.069        | Cancer related genes involved in cell death                                                                                 | Cancer              |
| CHIARETTI_ZAP70_DIFF                    | 9                    | 0.010        | 0.070        | Differentially expressed genes between high/low ZAP70 cases with T-ALL                                                      | Cancer              |
| IFNALPHA_HCC_UP                         | 10                   | 0.017        | 0.072        | Upreg by interferon alpha treatment in Hep3B hepatocellular carcinoma                                                       | Cancer              |
| BRG1_H1299_UP                           | 12                   | 0.007        | 0.072        | Up-reg by expression of BRG1 (SMARCA4) in lung cancer cells with mutant, inactive BRG1                                      | Cancer              |
| FLOTHO_CASP8AP2_MRD_DIFF                | 20                   | 0.009        | 0.082        | Genes significantly associated with MRD (minimal residual disease) in ALL                                                   | Cancer              |
| P21_P53_MIDDLE_DN                       | 9                    | 0.025        | 0.088        | Down-reg following ectopic expression of p21 (CDKN1A) in OvCa cells, p53-dependent                                          | Cancer              |
| ZHAN_MM_CD138_MF_VS_REST                | 6                    | 0.029        | 0.095        | 50 top ranked SAM-defined over-expressed genes in each subgroup_MF (multiple myeloma)                                       | Cancer              |
| YAGI_AML_PROG_FAB                       | 37                   | 0.003        | 0.095        | FAB type-specific probe sets (AML)                                                                                          | Cancer              |
| ZHAN_MM_CD138_HP_VS_REST                | 16                   | 0.033        | 0.098        | 50 top ranked SAM-defined over-expressed genes in each subgroup_HP (multiple myeloma)                                       | Cancer              |
| HSA05210_COLORECTAL_CANCER              | 26                   | 0.007        | 0.098        |                                                                                                                             | Cancer              |
| BECKER_TAMOXIFEN_RESISTANT_UP           | 9                    | 0.040        | 0.102        | Genes up-reg in a tamoxifen-resistant mammary carcinoma compared with a tamoxifen-sensitive mammary carcinoma               | Cancer              |
| BASSO_HCL_DIFF                          | 14                   | 0.017        | 0.116        | HCL (Hairy cell leukemia)-specific genes. HCL is a chronic B cell malignancy characterized by infiltration of BM and spleen | Cancer              |
| HSA05219_BLADDER_CANCER                 | 13                   | 0.029        | 0.117        | Genes involved in bladder cancer                                                                                            | Cancer              |
| KUMAR_HOXA_DIFF                         | 53                   | 0.000        | 0.122        | Genes that were significantly different between wild-type, preleukemic,                                                     | Cancer              |

Table S4. GSEA Report

**gsea\_report\_for\_Cont**

| NAME                                      | Core enrich. SIZE | NOM p-val | FDR q-val | DESCRIPTION                                                                                                                           | FUNCTIONAL GROUP              |
|-------------------------------------------|-------------------|-----------|-----------|---------------------------------------------------------------------------------------------------------------------------------------|-------------------------------|
| BRENTANI_TRANSCRIPTION_FACTORS            | 10                | 0.033     | 0.130     | and leukemic mice                                                                                                                     | <b>Cancer</b>                 |
| RADMACHER_AMLNORMALKARYTYPE_SIG           | 16                | 0.048     | 0.159     | Cancer related genes that are also transcription factors<br>Bullinger Validation Signature (Patients with AML and normal karyotype)   | <b>Cancer</b>                 |
| RAY_P210_DIFF                             | 15                | 0.049     | 0.160     | Classification of p210BCR-ABL (CML) differentially regulated genes                                                                    | <b>Cancer</b>                 |
| KRETZSCHMAR_IL6_DIFF                      | 30                | 0.011     | 0.167     | Probe sets that report an expression change in response to IL-6 addition to INA-6 cells (human myeloma cell line)                     | <b>Cancer</b>                 |
| BROCKE_IL6                                | 30                | 0.022     | 0.172     | Genes whose expression was modulated at least 1.5-fold in multiple myeloma INA-6 cells on addition of interleukin-6                   | <b>Cancer</b>                 |
| ET743_SARCOMA_24HRS_DN                    | 35                | 0.035     | 0.174     | Down-reg following treatment with Et-743 (anticancer agent) in sarcoma cell lines                                                     | <b>Cancer</b>                 |
| CORDERO_KRAS_KD_VS_CONTROL_UP             | 8                 | 0.050     | 0.175     | Genes upregulated in kras knockdown vs control in a human cell line                                                                   | <b>Cancer</b>                 |
| ALCALAY_AML_NPMC_UP                       | 28                | 0.040     | 0.179     | Increased expression in NPMc+ leukemias (nucleophosmin+ AML)                                                                          | <b>Cancer</b>                 |
| SHEPARD_CRASH_AND_BURN_MUT_VS_WT_DN       | 36                | 0.036     | 0.187     | Upreg in zebra fish wt compared to the crash&burn mutant (cell proliferation mutant with increased cancer susceptibility)             | <b>Cancer</b>                 |
| WANG_HOXA9_VS_MEIS1_DN                    | 14                | 0.000     | 0.000     | Increased expression in Hoxa9+Meis1-immortalized progenitors vs Hoxa9 alone                                                           | <b>Transformation (Meis1)</b> |
| ARGIROPOULUS_MEIS1_UP                     | 11                | 0.000     | 0         | Up-regulated in pre-leukemic progenitors overexpressing Meis-1                                                                        | <b>Transformation (Meis1)</b> |
| TAKEDA_NUP8_HOXA9_10D_UP                  | 32                | 0.000     | 0.013     | Up-regulated in CD34+ cells 10d after transduction with NUP98-HOXA9                                                                   | <b>Transformation</b>         |
| TAKEDA_NUP8_HOXA9_6H_UP                   | 17                | 0.002     | 0.018     | Up-regulated in CD34+ cells 6h after transduction with NUP98-HOXA9                                                                    | <b>Transformation</b>         |
| HTERT_UP                                  | 15                | 0.027     | 0.122     | Upreg in hTERT-immortalized fibroblasts vs. non-immortalized controls                                                                 | <b>Transformation</b>         |
| TAKEDA_NUP8_HOXA9_16D_UP                  | 23                | 0.027     | 0.129     | Effect of NUP98-HOXA9 on gene transcription at 16d after transduction UP                                                              | <b>Transformation</b>         |
| INTEGRIN_MEDIATED_CELL_ADHESION_KEGG      | 26                | 0.000     | 0.014     |                                                                                                                                       | <b>Cell adhesion</b>          |
| PASSERINI_TRANSCRIPTION                   | 13                | 0.000     | 0.019     | Cellular adhesion genes differentially expressed in EC of aortas from different flow areas                                            | <b>Cell adhesion</b>          |
| HSA04510_FOCAL_ADHESION                   | 38                | 0.000     | 0.021     | Genes involved in focal adhesion                                                                                                      | <b>Cell adhesion</b>          |
| HSA04540_GAP_JUNCTION                     | 28                | 0.000     | 0.028     | Genes involved in gap junction                                                                                                        | <b>Cell adhesion</b>          |
| RHOPATHWAY                                | 7                 | 0.000     | 0.032     | RhoA is a G protein whose active form stabilizes actin structures such as focal adhesions.                                            | <b>Cell adhesion</b>          |
| PASSERINI_PROLIFERATION                   | 15                | 0.002     | 0.032     | Genes associated with cellular adhesion in EC                                                                                         | <b>Cell adhesion</b>          |
| ECMPATHWAY                                | 6                 | 0.000     | 0.040     | ECM induces integrin-mediated phosphorylation in epithelial cells, leading to PI3 and MAP kinase activation and actin reorganization. | <b>Cell adhesion</b>          |
| CELL_ADHESION_RECEPTOR_ACTIVITY           | 5                 | 0.018     | 0.044     |                                                                                                                                       | <b>Cell adhesion</b>          |
| HSA04810_REGULATION_OF_ACTIN_CYTOSKELETON | 47                | 0.000     | 0.051     | Genes involved in regulation of actin cytoskeleton                                                                                    | <b>Cell adhesion</b>          |

Table S4. GSEA Report

## gsea\_report\_for\_Cont

| NAME                                                    | Core enrich.<br>SIZE | NOM<br>p-val | FDR<br>q-val | DESCRIPTION                                                                                                                 | FUNCTIONAL<br>GROUP        |
|---------------------------------------------------------|----------------------|--------------|--------------|-----------------------------------------------------------------------------------------------------------------------------|----------------------------|
| CELL_ADHESION                                           | 22                   | 0.003        | 0.053        |                                                                                                                             | Cell adhesion              |
| INTEGRINPATHWAY                                         | 8                    | 0.009        | 0.072        |                                                                                                                             | Cell adhesion              |
| METPATHWAY                                              | 14                   | 0.019        | 0.077        | The hepatocyte growth factor receptor c-Met stimulates proliferation and alters cell motility and adhesion                  | Cell adhesion              |
| HSA04520_ADHERENS_JUNCTION                              | 18                   | 0.009        | 0.082        |                                                                                                                             | Cell adhesion              |
| HSA04512_ECM_RECEPTOR_INTERACTIO                        | 14                   | 0.009        | 0.090        | Genes involved in ECM-receptor interaction                                                                                  | Cell adhesion              |
| BRENTANI_CELL_ADHESION                                  | 8                    | 0.015        | 0.094        | Cancer related genes involved in cell adhesion and metalloproteinases                                                       | Cell adhesion              |
| MCALPAINPATHWAY                                         | 8                    | 0.033        | 0.095        | In integrin-mediated cell migration, calpains digest links between the actin cytoskeleton and focal adhesion proteins.      | Cell migration             |
| PASSERINI_SIGNAL                                        | 46                   | 0.000        | 0.097        | Genes associated with adhesion differentially expressed in EC of aortas from disturbed flow vs undisturbed laminar flow     | Cell adhesion              |
| ST_INTEGRIN_SIGNALING_PATHWAY                           | 13                   | 0.024        | 0.116        |                                                                                                                             | Cell adhesion              |
| SIG_REGULATION_OF_THE_ACTIN_CYTOSKELETON_BY_RHO_GTPASES | 6                    | 0.032        | 0.119        | Genes related to regulation of the actin cytoskeleton                                                                       | Cell adhesion/cytoskeleton |
| PASSERINI_ADHESION                                      | 6                    | 0.050        | 0.141        | Genes associated with adhesion differentially expressed in EC from regions of disturbed flow vs regions of undisturbed flow | Cell adhesion/cytoskeleton |
| ROTH_HTERT_DIFF                                         | 10                   | 0.000        | 0.011        | Genes involved in DNA repair and cell-cycle control in hTERT-transduced T cells                                             | DNA repair                 |
| ATMPATHWAY                                              | 7                    | 0.000        | 0.020        | ATM responds to radiation-induced DNA damage by blocking cell-cycle and activating DNA repair                               | DNA repair                 |
| STRESS_GENOTOXIC_SPECIFIC_DN                            | 12                   | 0.002        | 0.031        | Genes down-reg following genotoxic stress (B-lymphoblastoid cell line)                                                      | DNA repair                 |
| UVC_TTD_ALL_DN                                          | 100                  | 0.000        | 0.038        | Down-regulated following treatment of XPB/TTD fibroblasts (defective in DNA repair) with UVC                                | DNA repair                 |
| CHEMICALPATHWAY                                         | 7                    | 0.012        | 0.040        | DNA damage promotes Bid cleavage, mitochondrial cyt c release and caspase activation                                        | DNA repair                 |
| CMV-UV_HCMV_6HRS_DN                                     | 22                   | 0.000        | 0.044        | Down-regulated in fibroblasts at 6 hours following infection with UV-inactivated human CMV                                  | DNA repair                 |
| UVC_TTD_4HR_DN                                          | 77                   | 0.000        | 0.050        | Downreg at 4h upon treatment of XPB/TTD fibroblasts with 3 J/m <sup>2</sup> UVC                                             | DNA repair                 |
| UVB_SCC_DN                                              | 29                   | 0.002        | 0.052        | Downregulated by UV-B light in squamous cell carcinoma cells                                                                | DNA repair                 |
| OXSTRESS_RPE_HNETBH_DN                                  | 14                   | 0.004        | 0.052        | Downregulated by HNE and t-BH in retinal pigment epithelium cells                                                           | DNA repair                 |
| UVB_NHEK1_DN                                            | 72                   | 0.000        | 0.068        | Downregulated by UV-B light in normal human epidermal keratinocytes                                                         | DNA repair                 |
| BLEO_HUMAN_LYMPH_HIGH_24HRS_UP                          | 22                   | 0.000        | 0.072        | Up-reg following treatment of human lymphocytes (TK6) with bleomycin (DNA-damaging agent)                                   | DNA repair                 |
| JISON_SICKLE_CELL                                       | 10                   | 0.016        | 0.073        | Genes differentially expressed in blood mononuclear cells of clinically stable sickle-cell patients                         | DNA repair                 |
| AS3_FIBRO_DN                                            | 8                    | 0.027        | 0.088        | Downreg by sodium arsenite (known to induce oxidative damage chromosome aberrations)                                        | DNA repair                 |

Table S4. GSEA Report

**gsea\_report\_for\_Cont**

| <b>NAME</b>                           | <b>Core enrich. SIZE</b> | <b>NOM p-val</b> | <b>FDR q-val</b> | <b>DESCRIPTION</b>                                                                                                      | <b>FUNCTIONAL GROUP</b>         |
|---------------------------------------|--------------------------|------------------|------------------|-------------------------------------------------------------------------------------------------------------------------|---------------------------------|
| UVC_HIGH_ALL_DN                       | 71                       | 0.000            | 0.103            | Down-regulated at any timepoint following treatment of WS1 human skin fibroblasts with UVC at a high dose               | <b>DNA repair</b>               |
| FMLPPATHWAY                           | 16                       | 0.031            | 0.110            | The fMLP receptor is a G-protein coupled receptor in neutrophils activates NADPH oxidase                                | <b>DNA repair</b>               |
| OXSTRESS_RPETWO_DN                    | 22                       | 0.011            | 0.115            | Downreg by two of H2O2, HNE and t-BH in retinal pigment epithelium cells                                                | <b>DNA repair</b>               |
| UVC_XPCS_ALL_DN                       | 105                      | 0.000            | 0.116            | Downreg at any timepoint upon treatment of XPB/CS fibroblasts with 3 J/m <sup>2</sup> UV                                | <b>DNA repair</b>               |
| CIS_XPC_UP                            | 21                       | 0.005            | 0.140            | Increased in XPC (a DNA damage recognition protein)-defective fibroblasts vs normal, following treatment with cisplatin | <b>DNA repair</b>               |
| CELL_CYCLE_CHECKPOINT                 | 5                        | 0.046            | 0.146            |                                                                                                                         | <b>DNA repair</b>               |
| PROLIFERATION_GENES                   | 57                       | 0.000            | 0.037            | Proliferation related genes                                                                                             | <b>Proliferation</b>            |
| SHEPARD_NEG_REG_OF_CELL_PROLIFERATION | 16                       | 0.000            | 0.044            | Negative regulators of cell proliferation in zebra fish                                                                 | <b>Neg reg of proliferation</b> |
| CELL_PROLIFERATION                    | 34                       | 0.002            | 0.077            |                                                                                                                         | <b>Proliferation</b>            |
| SHEPARD_CELL_PROLIFERATION            | 34                       | 0.002            | 0.089            | Cell proliferation genes determined in zebra fish                                                                       | <b>Proliferation</b>            |
| PEART_HISTONE_UP                      | 15                       | 0.012            | 0.092            | Cell-proliferation-related genes upregulated by SAHA and depsipeptide (histone deacetylase inhibitors)                  | <b>Proliferation</b>            |
| CELL_CYCLE_ARREST                     | 6                        | 0.047            | 0.116            |                                                                                                                         | <b>Neg reg of proliferation</b> |
| APOPTOSIS_GENMAPP                     | 17                       | 0.036            | 0.126            |                                                                                                                         | <b>Apoptosis</b>                |
| APOPTOSIS                             | 12                       | 0.042            | 0.160            |                                                                                                                         | <b>Apoptosis</b>                |
| ERK5PATHWAY                           | 5                        | 0.050            | 0.103            | Erk5 induces transcription of anti-apoptotic factors                                                                    | <b>Erk</b>                      |
| TGF_BETA_SIGNALING_PATHWAY            | 18                       | 0.002            | 0.017            |                                                                                                                         | <b>Tgfb</b>                     |
| HSA04350_TGF_BETA_SIGNALING_PATHWAY   | 24                       | 0.015            | 0.113            |                                                                                                                         | <b>Tgfb</b>                     |
| WNT_SIGNALING                         | 20                       | 0.022            | 0.103            |                                                                                                                         | <b>Wnt</b>                      |
| HSA04310_WNT_SIGNALING_PATHWAY        | 32                       | 0.032            | 0.191            |                                                                                                                         | <b>Wnt</b>                      |
| IFNA_HCMV_6HRS_UP                     | 14                       | 0.033            | 0.115            | Up-reg in fibroblasts at 6 hours following treatment with interferon-alpha                                              | <b>Ifna</b>                     |
| RADAEVA_IFNA_UP                       | 10                       | 0.032            | 0.116            | Genes up-regulated by interferon-alpha in primary hepatocyte                                                            | <b>Ifna</b>                     |
| IFN_ALPHA_UP                          | 10                       | 0.048            | 0.142            | Upreg 2-fold in HT1080 cells (human fibrosarcoma cell line) 6h upon treatment with interferon alpha                     | <b>Ifna</b>                     |
| DER_IFNA_UP                           | 13                       | 0.052            | 0.166            | Genes up-regulated by interferon-alpha in HT1080 (fibrosarcoma)                                                         | <b>Ifna</b>                     |
| HSA04630_JAK_STAT_SIGNALING_PATHWAY   | 33                       | 0.000            | 0.012            |                                                                                                                         | <b>Jack/Stat</b>                |
| MAPK_CASCADE                          | 9                        | 0.007            | 0.040            |                                                                                                                         | <b>Mapk</b>                     |

Table S4. GSEA Report

**gsea\_report\_for\_Cont**

| <b>NAME</b>          | <b>Core enrich.<br/>SIZE</b> | <b>NOM<br/>p-val</b> | <b>FDR<br/>q-val</b> | <b>DESCRIPTION</b>                                                                                                 | <b>FUNCTIONAL<br/>GROUP</b> |
|----------------------|------------------------------|----------------------|----------------------|--------------------------------------------------------------------------------------------------------------------|-----------------------------|
| P38MAPKPATHWAY       | 9                            | 0.028                | 0.115                | The Rho GTPases activate the p38 MAPKs under environmental stress or in the presence of pro-inflammatory cytokines | <b>Mapk</b>                 |
| MEF2DPATHWAY         | 5                            | 0.050                | 0.115                | Mef2 promote calcium-induced apoptosis in T cells and are regulated by MAP kinases and histone deacetylases        | <b>Mapk</b>                 |
| NTHIPATHWAY          | 8                            | 0.020                | 0.076                | Hemophilus influenzae infections activate NF-kB inducing the inflammatory response.                                | <b>NF-kB</b>                |
| NFATPATHWAY          | 9                            | 0.029                | 0.122                | Cardiac hypertrophy is induced by NF-ATc4 and GATA4, which are stimulated through calcineurin activated by CaMK    | <b>NFAT</b>                 |
| IRITANI_ADPROX_LYMPH | 29                           | 0.000                | 0.014                | Genes repressed by Mad1 (80% of which are induced by Myc)                                                          | <b>Myc</b>                  |
| YU_CMYC_UP           | 14                           | 0.003                | 0.055                | Myc-activated genes (during B-lymphomagenesis)                                                                     | <b>Myc</b>                  |



Table S4. GSEA Report

## gsea\_report\_for\_Mut

| NAME                                        | Core enrich.<br>SIZE | NOM<br>p-val | FDR<br>q-val | DESCRIPTION                                                                                                                           | FUNCTIONAL<br>GROUP           |
|---------------------------------------------|----------------------|--------------|--------------|---------------------------------------------------------------------------------------------------------------------------------------|-------------------------------|
| <b>Report for CMP - Phenotype:Mut</b>       |                      |              |              |                                                                                                                                       |                               |
| WANG_MLL_CBP_VS_GMP_UP                      | 20                   | 0.000        | 0.020        | MLL-CBP alters the genetic programs of GMP The top 50 genes most closely associated with MLL-CBP expression UP-regulated              | <b>Cancer/GMP phenptype</b>   |
| LEE_DENA_DN                                 | 11                   | 0.041        | 0.224        | Genes down-regulated in hepatoma induced by diethylnitrosamine                                                                        | <b>Cancer</b>                 |
| IDX_TSA_UP_CLUSTER6                         | 59                   | 0.000        | 0.012        | Up-reg during differentiation of 3T3-L1 fibroblasts into adipocytes with IDX, vs. fibroblasts treated to prevent differentiation      | <b>Differentiation</b>        |
| LIAN_MYELOID_DIFF_GRANULE                   | 10                   | 0.007        | 0.073        | Granule constituents expressed during mouse promyelocytic cell line cell differentiation                                              | <b>Differentiation</b>        |
| LIAN_MYELOID_DIFF_RECEPTORS                 | 14                   | 0.026        | 0.137        | Receptors expressed during myeloid differentiation process                                                                            | <b>Differentiation</b>        |
| FLAGELLAR_ASSEMBLY                          | 8                    | 0.049        | 0.178        |                                                                                                                                       | <b>Differentiation</b>        |
| TYPE_III_SECRETION_SYSTEM                   | 8                    | 0.038        | 0.186        |                                                                                                                                       | <b>Differentiation</b>        |
| GERY_CEBP_TARGETS                           | 18                   | 0.016        | 0.206        | Complete list of differentially regulated C/EBP-target genes                                                                          | <b>Differentiation</b>        |
| HOUSTIS_ROS                                 | 11                   | 0.014        | 0.080        | Genes known to modulate ROS or whose expression changes in response to ROS                                                            | <b>DNA repair</b>             |
| UVB_NHEK3_C7                                | 11                   | 0.025        | 0.169        | Regulated by UV-B light in normal human epidermal keratinocytes                                                                       | <b>DNA repair</b>             |
| BHATTACHARYA_ESC_UP                         | 12                   | 0.002        | 0.071        | Genes upregulated in undifferentiated human embryonic stem cells                                                                      | <b>ESC</b>                    |
| HSC_LATEPROGENITORS_SHARED                  | 100                  | 0.000        | 0.071        | Upreg in mouse hematopoietic late progenitors from both adult BM and FL                                                               | <b>Late progenitors</b>       |
| HSC_LATEPROGENITORS_FETAL                   | 100                  | 0.000        | 0.072        | Up-regulated in mouse hematopoietic late progenitors from fetal liver                                                                 | <b>Late progenitors</b>       |
| HSC_LATEPROGENITORS_ADULT                   | 104                  | 0.000        | 0.074        | Up-reg in mouse hematopoietic late progenitors from adult bone marrow                                                                 | <b>Late progenitors</b>       |
| HSC_INTERMEDIATEPROGENITORS_ADULT           | 45                   | 0.000        | 0.075        | Up-reg in mouse hematopoietic intermediate progenitors from adult BM                                                                  | <b>Late progenitors</b>       |
| HSC_INTERMEDIATEPROGENITORS_SHARED          | 41                   | 0.000        | 0.076        | Up-reg in mouse hematopoietic intermediate progenitors from both adult BM and fetal liver                                             | <b>Late progenitors</b>       |
| HSC_INTERMEDIATEPROGENITORS_FETAL           | 38                   | 0.000        | 0.092        | Up-reg in mouse hematopoietic intermediate progenitors from fetal liver                                                               | <b>Late progenitors</b>       |
| HSC_MATURE_ADULT                            | 60                   | 0.000        | 0.211        | Upreg in mouse mature blood cells from adult BM, compared to progenitors                                                              | <b>Late progenitors</b>       |
| WANG_HOXA9_VS_MEIS1_UP                      | 14                   | 0.000        | 0.000        | Genomic signature of progenitors immortalized by Hoxa9 versus Hoxa9 plus Meis1 Increased expression in Hoxa9-immortalized progenitors | <b>Transformation (Meis1)</b> |
| ARGIROPOULUS_MEIS1_DOWN                     | 24                   | 0.000        | 0.000        | Down-regulated in pre-leukemic progenitors overexpressing Meis-1                                                                      | <b>Transformation (Meis1)</b> |
| HSA00600_SPHINGOLIPID_METABOLISM            | 11                   | 0.000        | 0.000        |                                                                                                                                       | <b>Metabolism</b>             |
| GLUTATHIONE_METABOLISM                      | 10                   | 0.000        | 0.007        |                                                                                                                                       | <b>Metabolism</b>             |
| GLUCONEOGENESIS                             | 13                   | 0.000        | 0.011        |                                                                                                                                       | <b>Metabolism</b>             |
| GLYCOLYSIS                                  | 13                   | 0.000        | 0.015        |                                                                                                                                       | <b>Metabolism</b>             |
| HSA00010_GLYCOLYSIS_AND_GLU<br>CONEOGENESIS | 14                   | 0.002        | 0.019        |                                                                                                                                       | <b>Metabolism</b>             |

Table S4. GSEA Report

**gsea\_report\_for\_Mut**

| <b>NAME</b>                                            | <b>Core enrich.<br/>SIZE</b> | <b>NOM<br/>p-val</b> | <b>FDR<br/>q-val</b> | <b>DESCRIPTION</b>                            | <b>FUNCTIONAL<br/>GROUP</b> |
|--------------------------------------------------------|------------------------------|----------------------|----------------------|-----------------------------------------------|-----------------------------|
| HSA00340_HISTIDINE_METABOLISM                          | 15                           | 0.000                | 0.019                |                                               | <b>Metabolism</b>           |
| ELECTRON_TRANSPORTER_ACTIVITY                          | 25                           | 0.000                | 0.031                |                                               | <b>Metabolism</b>           |
| PYRUVATE_METABOLISM                                    | 11                           | 0.000                | 0.031                |                                               | <b>Metabolism</b>           |
| HSA00450_SELENOAMINO_ACID_<br>METABOLISM               | 12                           | 0.009                | 0.036                |                                               | <b>Metabolism</b>           |
| HSA00561_GLYCEROLIPID_METABOLISM                       | 13                           | 0.000                | 0.047                |                                               | <b>Metabolism</b>           |
| HSA00480_GLUTATHIONE_METABOLISM                        | 9                            | 0.006                | 0.064                |                                               | <b>Metabolism</b>           |
| HSA00030_PENTOSE_PHOSPHATE_PATHW                       | 8                            | 0.009                | 0.068                |                                               | <b>Metabolism</b>           |
| HSA00150_ANDROGEN_AND_ESTROGEN<br>_METABOLISM          | 9                            | 0.006                | 0.070                |                                               | <b>Metabolism</b>           |
| HSA00590_ARACHIDONIC_ACID_<br>METABOLISM               | 6                            | 0.014                | 0.070                |                                               | <b>Metabolism</b>           |
| HSA00620_PYRUVATE_METABOLISM                           | 10                           | 0.004                | 0.071                |                                               | <b>Metabolism</b>           |
| PENTOSE_PHOSPHATE_PATHWAY                              | 8                            | 0.014                | 0.075                |                                               | <b>Metabolism</b>           |
| GLYCOLYSIS_AND_GLUONEOGENESIS                          | 9                            | 0.007                | 0.076                |                                               | <b>Metabolism</b>           |
| GLYCEROLIPID_METABOLISM                                | 7                            | 0.015                | 0.077                |                                               | <b>Metabolism</b>           |
| HSA00970_AMINOACYL_TRNA_<br>BIOSYNTHESIS               | 10                           | 0.018                | 0.125                |                                               | <b>Metabolism</b>           |
| HSA00220_UREA_CYCLE_AND_<br>METABOLISM_OF_AMINO_GROUPS | 9                            | 0.030                | 0.159                |                                               | <b>Metabolism</b>           |
| HSA00260_GLYCINE_SERINE_AND_<br>THREONINE_METABOLISM   | 8                            | 0.034                | 0.166                |                                               | <b>Metabolism</b>           |
| HSA00252_ALANINE_AND_ASPARTATE_<br>METABOLISM          | 11                           | 0.037                | 0.168                |                                               | <b>Metabolism</b>           |
| ATP_SYNTHESIS                                          | 8                            | 0.035                | 0.168                |                                               | <b>Metabolism</b>           |
| GALACTOSE_METABOLISM                                   | 8                            | 0.050                | 0.175                |                                               | <b>Metabolism</b>           |
| GLYCINE_SERINE_AND_THREONINE_<br>METABOLISM            | 8                            | 0.046                | 0.187                |                                               | <b>Metabolism</b>           |
| SIG_INSULIN_RECEPTOR_PATHWAY_IN_<br>CARDIAC_MYOCYTES   | 5                            | 0.040                | 0.224                | Genes related to the insulin receptor pathway | <b>Metabolism</b>           |
| PROPANOATE_METABOLISM                                  | 8                            | 0.054                | 0.226                |                                               | <b>Metabolism</b>           |
| HSA00380_TRYPTOPHAN_METABOLISM                         | 11                           | 0.037                | 0.230                |                                               | <b>Metabolism</b>           |
| MITOCHONDRIA                                           | 120                          | 0.000                | 0.072                | Mitochondrial genes                           | <b>Mitochondria</b>         |
| HUMAN_MITODB_6_2002                                    | 115                          | 0.000                | 0.078                | Mitochondrial genes                           | <b>Mitochondria</b>         |
